# Supplementary material for: The Effectiveness of Methadone Maintenance Therapy (MMT) on Drug Tolerance, Mediated by Receptor Signaling, Signal Transduction and Intracellular Transport
Source: Research Square preprint supplement (doi:10.21203/rs.3.rs-1562550/v1), 2022-05-12
Supplement: Supplementary file 1 [file 4a75aa08aab80b1d609064c0.xlsx]

## Sheet: Expanded gene sets input.
gene name
NEFL
IL4
GNB5
DRD2
ADRA2A
DDAH1
TRPC1
PCBP3
SYN2
GNG7
TACR1
ADCY3
TPM3
ITIH4
TH
EPHB2
GNG4
ERAL1
COMT
ALDOC
UCHL1
HSPA8
IL2
NDUFA5
LRRFIP1
ALDH6A1
HSPA2
PPP2R5B
PNOC
GLUL
CYP1A1
PLCB2
WDR1
ADIPOQ
NR4A3
NR4A1
MAOB
MECP2
CAMK2B
TPI1
PRDX2
PGAM1
ABAT
TUBB3
DNM1
DRD4
KMT2A
OPRD1
PPP3R1
PFKP
ATP6V1A
RAB22A
VDAC1
OPRL1
KIF5A
GSTM3
SLC6A4
NTF3
GNAQ
PLD2
LPP
GFAP
NRG1
CAMK2A
PPP2R2A
PDHB
CSTB
PKM
NDUFV2
OPRK1
CRYM
LDHA
NDUFS2
PRDX6
GNG5
GLO1
PRKCG
GNGT1
ACO2
CS
ERP29
PHGDH
PTPRF
ANXA3
SLC11A2
ALDH5A1
ITPR2
GSTO1
VEGFA
CALB2
STMN1
ITPR3
MAOA
PGK1
RAB5A
PRKCB
ABCB1
ATP1A1
PRL
CYP19A1
SNAP25
IRF7
UBE2L6
GNB2
ATP5G1
LDHB
TF
PRKAR1A
RAB1A
BDNF
HSPA9
PARK7
PEBP1
GRIA2
KIF5C
CKB
SDHA
GOT1
PGM1
VDAC2
ACTR2
CRMP1
GRIN2A
OPRM1
DRD3
GRIP1
DNM3
GNAO1
NGF
DRD1
PRKCA
GRIN2B
PDHA1
MAP2K1
TPM1
GNG12
COX5B
ALDOA
ENO2
SLC9A3R1
GRK2
TNF
ENO1
GPI
STIP1
HSPD1
SH3GL2
KIF5B
ATP6V1H
DLAT
GLUD1
PHB
TUBA4A
TKT
STXBP1
ATP5A1
TFRC
UQCRC1
ARNTL
IL1B
QKI
CLTC
ATP6V1B2
PDGFRB
ENG
IL6
P4HB
CDK5
GPX1
GNG11
CCT5
HSP90AB1
EEF1A1
GAPDH
ACTB
GSTP1
CTSD
RB1
FOS
IGF1
PPP3CA
GNB1
GMFB
ATP5B
EGF
GDI1
SNCB
CAPNS1
NAPA
GNAI1
FSCN1
PDIA3
MAPK1
TUBA1A
CCT2
YWHAE
JUN
HIF1A
ANXA5
DLD
SOD1
PPP2R1A
FLNA
AKT1
CALM1
HNRNPA1
YWHAZ
EGFR
YWHAQ
ADAM17
MDH1
ATF2
STX1A
TUBB2A
IDH3G
DNM2
HSP90AA1
ATP5C1
NME1
MDH2
RPS6KB2
CAPZB
ATP5G3
OGDH
CCT4
PFKM
CCT7
HSPA5
SLC17A6
NAPB
PACSIN1
PPP1R1B
ZIC2
GSTO2
CNDP2
ATP1A3
GNG3
DPYSL5
LAP3
HNRNPH2
GRIA3
CALB1
EEF1B2
EEF1G
PPIA
CCT3
GRIA1
SUCLG1
GNG13
SNPH
HTR2A
ACTG1
PRDX5
CC2D1A
NME2
GRIA4
DRP2
GSTM1
GNG10
GDA
PPP2R3A
TP73
IDH3A
UBE2N
PLG
FZD4
RABGEF1
PLCB1
IL15
GNB4
DPYSL2
SLC35E1
ICAM1
DTX3L
TMOD2
NSF
CLOCK
ATXN1
NFKB1
ITPR1
DLG4
NDUFA10
ELK1
ARF1
SNCA
ARRB2
APP
REST
YWHAB
GNB3
ENO3
TCP1
TCEB3
GNG8
PDCD5
EGR4
SOD2
HK1
SIRT2
FABP7
EEA1
USP18
CKMT1B
DDAH2
NCS1
GRK4
YME1L1
EEF2
ARRB1
GRIN1
AKAP2
TUBA3C
GNG2
WLS
TAS1R1
CCKBR
ZNF721
IL13
SLC6A3
CYSLTR2
ZNF611
DRD5
PRR11
NPY4R
NPAS4
GNGT2
DTNBP1
CALM2
METTL21A
PLCXD3
CKMT1A
