# Supplementary material for: The Effectiveness of Methadone Maintenance Therapy (MMT) on Drug Tolerance, Mediated by Receptor Signaling, Signal Transduction and Intracellular Transport
Source: Research Square preprint supplement (doi:10.21203/rs.3.rs-1562550/v1), 2022-05-12
Supplement: Supplementary file 2 [file f9b111693caa97d9570b181d.xlsx]

## Sheet: Centiscape
SUID	annotation name	annotations	Betweenness unDir	Bridging unDir	Centroid unDir	Closeness unDir	Degree unDir	Eccentricity unDir	EigenVector unDir	Ensembl Gene ID	Ensembl Protein ID	Entrez Gene ID	gene name	log score	MCODE_Cluster	MCODE_Node_Status	MCODE_Score	name	node type	query term	Radiality unDir	RefSeq mRNA ID	RefSeq Protein ID	score	selected	shared name	Stress unDir	Synonym	Uniprot ID
88	axon|neuron part|cytoskeleton-dependent intracellular transport|microtubule-based transport|microtubule-based movement|neuron projection|axon cargo transport	GO:0030424|GO:0097458|GO:0030705|GO:0010970|GO:0007018|GO:0043005|GO:0008088	202.035	2.38914	-84	0.00166667	81	0.333333	0.0469999	ENSG00000277586	ENSP00000483690	4747	NEFL	-0.20326	Cluster 3	Clustered	9.83215	H__sapiens__1_-759252	query	NEFL	2.18182	NM_006158	NP_006149	0.816066	FALSE	H__sapiens__1_-759252	3634	PPP1R110	P07196
89	positive regulation of DNA metabolic process|regulation of myeloid leukocyte differentiation|regulation of immune effector process|cytokine receptor binding|positive regulation of T cell proliferation|growth factor activity|T cell activation|myeloid leukocyte differentiation|leukocyte mediated immunity|positive regulation of lymphocyte proliferation|alcohol metabolic process|leukocyte differentia…	GO:0051054|GO:0002761|GO:0002697|GO:0005126|GO:0042102|GO:0008083|GO:0042110|GO:0002573|GO:0002443|GO:0050671|GO:0006066|GO:0002521|GO:0070851|GO:0032946|GO:0001819	147.23	4.05548	-108	0.00160256	45	0.333333	0.0272496	ENSG00000113520	ENSP00000480581	3565	IL4	-0.17157	Cluster 9	Clustered	3.09447	H__sapiens__1_-705174	query	IL4	2.10909	NM_172348	NP_758858	0.842341	FALSE	H__sapiens__1_-705174	2176	MGC79402	P05112
91	negative regulation of cation channel activity|regulation of calcium ion transport|calcium ion transport|regulation of calcium ion transmembrane transporter activity|regulation of rhodopsin mediated signaling pathway|GTPase activity|regulation of cation channel activity|regulation of ion transmembrane transport|cellular response to radiation|regulation of ion transmembrane transporter activity|ce…	GO:2001258|GO:0051924|GO:0006816|GO:1901019|GO:0022400|GO:0003924|GO:2001257|GO:0034765|GO:0071478|GO:0032412|GO:0071482|GO:0010959|GO:0009314|GO:0032409|GO:1901385|GO:0051051|GO:0051087|GO:0070838|GO:0072511|GO:0008277|GO:0034762|GO:1901020|GO:0016056|GO:0022898|GO:0043269|GO:0071214|GO:0032410|GO:0032413|GO:0009416	259.837	2.04936	-69	0.0017094	106	0.333333	0.0590064	ENSG00000069966	ENSP00000454185	10681	GNB5	-0.205266	Cluster 1	Clustered	22.3915	H__sapiens__1_-702065	query	GNB5	2.22727	NM_016194	NP_057278	0.814431	FALSE	H__sapiens__1_-702065	4402	GB5	O14775
92	cellular metal ion homeostasis|regulation of purine nucleotide biosynthetic process|negative regulation of protein transport|visual learning|negative regulation of cAMP metabolic process|regulation of calcium ion transmembrane transporter activity|drug binding|regulation of adenylate cyclase activity|icosanoid transport|regulation of ion transmembrane transport|muscle system process|long-chain fa…	GO:0006875|GO:1900371|GO:0051224|GO:0008542|GO:0030815|GO:1901019|GO:0008144|GO:0045761|GO:0071715|GO:0034765|GO:0003012|GO:0015909|GO:0001505|GO:0050709|GO:0032412|GO:0072507|GO:0008015|GO:0032922|GO:0045471|GO:0055065|GO:0030594|GO:0010959|GO:0009306|GO:0032409|GO:0051302|GO:0009712|GO:1901385|GO:0090068|GO:0030424|GO:0006869|GO:1901571|GO:0007611|GO:0015849|GO:0030803|GO:0045744|GO:0030808|GO:…	368.495	3.57615	-78	0.0016835	82	0.5	0.0459175	ENSG00000149295	ENSP00000442172	1813	DRD2	-0.185822	Cluster 1	Clustered	22.7877	H__sapiens__1_-710187	query	DRD2	2.2	NM_016574	NP_057658	0.830422	FALSE	H__sapiens__1_-710187	6054		P14416
94	regulation of purine nucleotide biosynthetic process|positive regulation of epidermal growth factor receptor signaling pathway|membrane protein proteolysis|negative regulation of cAMP metabolic process|regulation of calcium ion transmembrane transporter activity|regulation of protein catabolic process|adrenergic receptor binding|regulation of protein tyrosine kinase activity|regulation of adenyla…	GO:1900371|GO:0045742|GO:0033619|GO:0030815|GO:1901019|GO:0042176|GO:0031690|GO:0061097|GO:0045761|GO:0034765|GO:0050731|GO:0032412|GO:0050995|GO:0007176|GO:0010959|GO:0032409|GO:0043406|GO:2000147|GO:0017157|GO:1901186|GO:0030803|GO:0045744|GO:0030808|GO:0043410|GO:0015850|GO:0030168|GO:0034762|GO:0030814|GO:0050433|GO:1900372|GO:0009187|GO:0090276|GO:0006509|GO:0000187|GO:0010817|GO:0006816|GO:…	338.076	3.67794	-78	0.0016835	81	0.5	0.0441212	ENSG00000150594	ENSP00000280155	150	ADRA2A	-0.207068	Cluster 1	Clustered	20	H__sapiens__1_-710307	query	ADRA2A	2.2	NM_000681	NP_000672	0.812964	FALSE	H__sapiens__1_-710307	4480	ADRAR	P08913
95	carboxylic acid catabolic process|regulation of blood pressure|glutamine family amino acid metabolic process|regulation of systemic arterial blood pressure|circulatory system process|alpha-amino acid catabolic process|nitric oxide biosynthetic process|nitric oxide metabolic process|second-messenger-mediated signaling|alpha-amino acid metabolic process|small molecule catabolic process|blood circul…	GO:0046395|GO:0008217|GO:0009064|GO:0003073|GO:0003013|GO:1901606|GO:0006809|GO:0046209|GO:0019932|GO:1901605|GO:0044282|GO:0008015|GO:0045429|GO:0006575|GO:0016054|GO:0009065|GO:0009063|GO:0045428	332.834	3.79595	-75	0.00169205	78	0.333333	0.0516555	ENSG00000153904	ENSP00000488725	23576	DDAH1	-0.16841	Cluster 6	Clustered	5.99529	H__sapiens__1_-710690	query	DDAH1	2.20909	NM_012137	NP_036269	0.845008	FALSE	H__sapiens__1_-710690	4884	DDAH	O94760
97	cellular metal ion homeostasis|divalent inorganic cation transmembrane transporter activity|regulation of ion homeostasis|channel activity|regulation of sequestering of calcium ion|calcium ion transmembrane transporter activity|regulation of calcium ion transport|calcium ion transport into cytosol|calcium ion transport|substrate-specific channel activity|positive regulation of intracellular trans…	GO:0006875|GO:0072509|GO:2000021|GO:0015267|GO:0051282|GO:0015085|GO:0051924|GO:0060402|GO:0006816|GO:0022838|GO:0032388|GO:0032844|GO:0043270|GO:0055074|GO:0032386|GO:0072507|GO:0010522|GO:0010035|GO:0046873|GO:0055065|GO:0010959|GO:0006873|GO:0051209|GO:0005216|GO:0070838|GO:0072511|GO:0007204|GO:0006874|GO:0051281|GO:0022803|GO:0032846|GO:0051279|GO:0051480|GO:0022890|GO:0072503|GO:0043269|GO:…	77.0127	3.19717	-110	0.00159744	44	0.333333	0.0310156	ENSG00000144935	ENSP00000481537	7220	TRPC1	-0.207219	Cluster 6	Clustered	7.13235	H__sapiens__1_-709636	query	TRPC1	2.10303	NM_003304	NP_003295	0.812841	FALSE	H__sapiens__1_-709636	1304	HTRP-1	P48995
99			532.166	4.54605	-64	0.00172414	87	0.333333	0.0564079	ENSG00000183570	ENSP00000448986	54039	PCBP3	-0.209229	Cluster 7	Clustered	5.15985	H__sapiens__1_-716525	query	PCBP3	2.24242	NM_020528	NP_065389	0.81121	FALSE	H__sapiens__1_-716525	7256		P57721
100			31.8867	2.09909	-124	0.00156006	37	0.333333	0.024679	ENSG00000157152	ENSP00000484916	6854	SYN2	-0.146154	Cluster 3	Clustered	10.6765	H__sapiens__1_-711064	query	SYN2	2.05758	NM_133625	NP_598328	0.864025	FALSE	H__sapiens__1_-711064	566	SYNIIb
102	response to glucagon|cellular response to peptide|response to peptide|cellular response to peptide hormone stimulus|energy reserve metabolic process|response to peptide hormone|energy derivation by oxidation of organic compounds|regulation of G-protein coupled receptor protein signaling pathway|cellular response to glucagon stimulus	GO:0033762|GO:1901653|GO:1901652|GO:0071375|GO:0006112|GO:0043434|GO:0015980|GO:0008277|GO:0071377	274.342	2.42898	-80	0.00167785	93	0.333333	0.0455094	ENSG00000176533	ENSP00000468650	2788	GNG7	-0.167964	Cluster 1	Clustered	22.3915	H__sapiens__1_-715105	query	GNG7	2.19394	NM_052847	NP_443079	0.845384	FALSE	H__sapiens__1_-715105	4192	FLJ00058	O60262
104	inflammatory response|behavior|single-organism behavior|G-protein coupled receptor activity|peptide receptor activity|neurotransmitter receptor activity|G-protein coupled peptide receptor activity|phospholipase C-activating G-protein coupled receptor signaling pathway	GO:0006954|GO:0007610|GO:0044708|GO:0004930|GO:0001653|GO:0030594|GO:0008528|GO:0007200	166.338	4.50964	-105	0.00161031	47	0.333333	0.0300156	ENSG00000115353	ENSP00000386448	6869	TACR1	-0.174617	Cluster 8	Clustered	4.1371	H__sapiens__1_-705396	query	TACR1	2.11818	NM_015727	NP_056542	0.839778	FALSE	H__sapiens__1_-705396	2718	TAC1R	P25103
106	regulation of phospholipase C activity|cellular response to fibroblast growth factor stimulus|adenylate cyclase-activating G-protein coupled receptor signaling pathway|positive regulation of lipase activity|epidermal growth factor receptor signaling pathway|positive regulation of phospholipase C activity|energy reserve metabolic process|fibroblast growth factor receptor signaling pathway|response…	GO:1900274|GO:0044344|GO:0007189|GO:0060193|GO:0007173|GO:0010863|GO:0006112|GO:0008543|GO:0071774|GO:0007187|GO:0033762|GO:0010517|GO:1901653|GO:0032147|GO:1901652|GO:0071375|GO:0007193|GO:0007188|GO:0060191|GO:0043434|GO:0071377|GO:0010518|GO:0007202|GO:0038179|GO:0015980|GO:0038127|GO:0048011	37.2661	4.13042	-123	0.00156495	27	0.333333	0.0211842	ENSG00000138031	ENSP00000476143	109	ADCY3	-0.186884		Unclustered	3.09881	H__sapiens__1_-708583	query	ADCY3	2.06364	NM_004036	NP_004027	0.82954	FALSE	H__sapiens__1_-708583	600	AC3	O60266
108	muscle system process	GO:0003012	257.746	4.39365	-89	0.00165289	64	0.333333	0.0475269	ENSG00000143549	ENSP00000480520	7170	TPM3	-0.196817	Cluster 3	Clustered	9.65242	H__sapiens__1_-709418	query	TPM3	2.16667	NM_153649	NP_705935	0.821341	FALSE	H__sapiens__1_-709418	3996	NEM1	P06753
110	negative regulation of peptidase activity|inflammatory response|enzyme inhibitor activity|regulation of endopeptidase activity|acute-phase response|regulation of peptidase activity|negative regulation of endopeptidase activity|blood microparticle	GO:0010466|GO:0006954|GO:0004857|GO:0052548|GO:0006953|GO:0052547|GO:0010951|GO:0072562	70.9191	4.58359	-123	0.00156495	31	0.333333	0.0169892	ENSG00000055955	ENSP00000417824	3700	ITIH4	-0.196829		Unclustered	3.61538	H__sapiens__1_-701730	query	ITIH4	2.06364	NM_002218	NP_002209	0.821331	FALSE	H__sapiens__1_-701730	950	ITIHL1	Q14624
112	sensory perception|behavior|response to oxygen levels|neuronal cell body|response to hypoxia|locomotory behavior|cell body|dopamine metabolic process|neuron projection|neuron part|regulation of heart contraction|response to decreased oxygen levels|response to ethanol|eye photoreceptor cell differentiation|organic hydroxy compound biosynthetic process|vesicle membrane|catechol-containing compound …	GO:0007600|GO:0007610|GO:0070482|GO:0043025|GO:0001666|GO:0007626|GO:0044297|GO:0042417|GO:0043005|GO:0097458|GO:0008016|GO:0036293|GO:0045471|GO:0001754|GO:1901617|GO:0012506|GO:0009712|GO:0060047|GO:0050890|GO:0006584|GO:0044708|GO:0003015|GO:0007611|GO:0030659|GO:0044057|GO:0003013|GO:0007612|GO:1901605|GO:0018958|GO:0097305|GO:0007270|GO:0001963	38.9599	4.00992	-131	0.0015456	27	0.333333	0.0174902	ENSG00000180176	ENSP00000403546	7054	TH	-0.200895		Unclustered	2.2549	H__sapiens__1_-715820	query	TH	2.03939	NM_199293	NP_954987	0.817998	FALSE	H__sapiens__1_-715820	652	DYT5b	P07101
114	axon|peptidyl-tyrosine modification|forebrain development|dendrite development|peptidyl-tyrosine phosphorylation|dendritic spine organization|positive regulation of cellular component biogenesis|neuron projection|regulation of synapse structure and activity|neuron part|regulation of nervous system development|synapse organization|dendritic spine morphogenesis|dendritic spine development|synapse a…	GO:0030424|GO:0018212|GO:0030900|GO:0016358|GO:0018108|GO:0097061|GO:0044089|GO:0043005|GO:0050803|GO:0097458|GO:0051960|GO:0050808|GO:0060997|GO:0060996|GO:0007416|GO:0001525|GO:0030425|GO:0007420	131.377	3.95318	-102	0.00161551	50	0.333333	0.034345	ENSG00000133216	ENSP00000444174	2048	EPHB2	-0.201003	Cluster 8	Clustered	4.02381	H__sapiens__1_-707720	query	EPHB2	2.12424	NM_017449	NP_059145	0.81791	FALSE	H__sapiens__1_-707720	2098	Tyro5	P29323
116	response to glucagon|cellular response to peptide|response to peptide|cellular response to peptide hormone stimulus|regulation of growth|energy reserve metabolic process|response to peptide hormone|energy derivation by oxidation of organic compounds|regulation of G-protein coupled receptor protein signaling pathway|cellular response to glucagon stimulus	GO:0033762|GO:1901653|GO:1901652|GO:0071375|GO:0040008|GO:0006112|GO:0043434|GO:0015980|GO:0008277|GO:0071377	218.947	2.28614	-86	0.00166113	83	0.333333	0.0381049	ENSG00000282972	ENSP00000489454	2786	GNG4	-0.207053	Cluster 1	Clustered	22.3915	H__sapiens__1_-713307	query	GNG4	2.17576	NM_004485	NP_004476	0.812977	FALSE	H__sapiens__1_-713307	2854		P50150
118	mitochondrial matrix	GO:0005759	20.9702	2.47585	-141	0.00151057	27	0.333333	0.0231978	ENSG00000132591	ENSP00000467860	26284	ERAL1	-0.216383	Cluster 3	Clustered	9.53333	H__sapiens__1_-707603	query	ERAL1	1.99394	NM_005702	NP_005693	0.805427	FALSE	H__sapiens__1_-707603	490	HERA-B	O75616
119	neurotransmitter metabolic process|cellular response to xenobiotic stimulus|regulation of neurotransmitter levels|xenobiotic metabolic process|response to xenobiotic stimulus|neurotransmitter biosynthetic process	GO:0042133|GO:0071466|GO:0001505|GO:0006805|GO:0009410|GO:0042136	22.8414	2.19734	-132	0.00153374	30	0.333333	0.0265891	ENSG00000093010	ENSP00000416778	1312	COMT	-0.184178	Cluster 5	Clustered	8.67984	H__sapiens__1_-702970	query	COMT	2.02424	NM_007310	NP_009294	0.831788	FALSE	H__sapiens__1_-702970	548		P21964
121	epithelial cell differentiation|monosaccharide biosynthetic process|hexose metabolic process|glucose metabolic process|glucose catabolic process|carbohydrate catabolic process|hexose catabolic process|glycolysis|monosaccharide catabolic process|single-organism carbohydrate catabolic process|gluconeogenesis|carbohydrate biosynthetic process|monosaccharide metabolic process|hexose biosynthetic proc…	GO:0030855|GO:0046364|GO:0019318|GO:0006006|GO:0006007|GO:0016052|GO:0019320|GO:0006096|GO:0046365|GO:0044724|GO:0006094|GO:0016051|GO:0005996|GO:0019319	378.103	4.1007	-74	0.00169492	83	0.333333	0.0565873	ENSG00000109107	ENSP00000465623	230	ALDOC	-0.213481	Cluster 5	Clustered	7.51686	H__sapiens__1_-704614	query	ALDOC	2.21212	NM_005165	NP_005156	0.807768	FALSE	H__sapiens__1_-704614	6036		P09972
123	negative regulation of MAPK cascade|negative regulation of protein serine/threonine kinase activity|negative regulation of phosphorylation|adrenergic receptor binding|negative regulation of phosphate metabolic process|negative regulation of protein kinase activity|negative regulation of protein phosphorylation|regulation of protein serine/threonine kinase activity|negative regulation of MAP kinas…	GO:0043409|GO:0071901|GO:0042326|GO:0031690|GO:0045936|GO:0006469|GO:0001933|GO:0071900|GO:0043407|GO:0033673|GO:1902532|GO:0043405|GO:0051348|GO:0010563|GO:0001664	250.199	3.16787	-72	0.00170068	83	0.5	0.0604181	ENSG00000154277	ENSP00000426895	7345	UCHL1	-0.216659	Cluster 6	Clustered	6.73803	H__sapiens__1_-710747	query	UCHL1	2.21818	NM_004181	NP_004172	0.805204	FALSE	H__sapiens__1_-710747	4228	Uch-L1	P09936
125	coated vesicle|ribonucleoside monophosphate metabolic process|regulation of neurotransmitter levels|purine nucleoside monophosphate catabolic process|nucleoside monophosphate catabolic process|purine nucleoside monophosphate metabolic process|vesicle membrane|ATP catabolic process|purine ribonucleoside monophosphate catabolic process|antigen binding|coated vesicle membrane|response to topological…	GO:0030135|GO:0009161|GO:0001505|GO:0009128|GO:0009125|GO:0009126|GO:0012506|GO:0006200|GO:0009169|GO:0003823|GO:0030662|GO:0035966|GO:0046034|GO:0016887|GO:0006457|GO:0030136|GO:0023026|GO:0009167|GO:0030665|GO:0006836|GO:0030659|GO:0023023|GO:0023061|GO:0009158|GO:0009123|GO:0006892|GO:0048193|GO:0007269|GO:0006986|GO:0072562	267.046	1.80962	-68	0.00171233	117	0.333333	0.0701256	ENSG00000109971	ENSP00000437189	3312	HSPA8	-0.219565	Cluster 2	Clustered	17.6078	H__sapiens__1_-704704	query	HSPA8	2.2303	NM_153201	NP_694881	0.802868	FALSE	H__sapiens__1_-704704	4898	HSPA10	P11142
127	peptidyl-tyrosine modification|positive regulation of inflammatory response|kinase regulator activity|positive regulation of response to external stimulus|cytokine receptor binding|positive regulation of defense response|positive regulation of T cell proliferation|growth factor activity|T cell activation|regulation of inflammatory response|cell-type specific apoptotic process|positive regulation …	GO:0018212|GO:0050729|GO:0019207|GO:0032103|GO:0005126|GO:0031349|GO:0042102|GO:0008083|GO:0042110|GO:0050727|GO:0097285|GO:0050731|GO:0002521|GO:0070851|GO:0040008|GO:0032946|GO:0001819|GO:0046425|GO:0018108|GO:0071887|GO:0007259|GO:0050730|GO:0006954|GO:0050671|GO:0005125|GO:0045927	138.271	4.0707	-100	0.00162338	49	0.333333	0.0327001	ENSG00000109471	ENSP00000226730	3558	IL2	-0.221255	Cluster 8	Clustered	3.78409	H__sapiens__1_-704649	query	IL2	2.13333	NM_000586	NP_000577	0.801512	FALSE	H__sapiens__1_-704649	2346	TCGF	P60568
129	electron transport chain|oxidative phosphorylation|mitochondrial respiratory chain|oxidoreductase complex|respiratory chain|mitochondrial membrane part|respiratory electron transport chain|energy derivation by oxidation of organic compounds|cellular respiration|mitochondrial membrane|organelle inner membrane|mitochondrial inner membrane	GO:0022900|GO:0006119|GO:0005746|GO:1990204|GO:0070469|GO:0044455|GO:0022904|GO:0015980|GO:0045333|GO:0031966|GO:0019866|GO:0005743	97.8817	2.59654	-100	0.00162338	58	0.333333	0.0392059	ENSG00000128609	ENSP00000484180	4698	NDUFA5	-0.222959	Cluster 5	Clustered	8.30435	H__sapiens__1_-707034	query	NDUFA5	2.13333	NM_005000	NP_004991	0.800148	FALSE	H__sapiens__1_-707034	1710	UQOR13	Q16718
130	double-stranded RNA binding|positive regulation of cytokine production	GO:0003725|GO:0001819	266.917	4.65605	-88	0.00165563	62	0.333333	0.0452861	ENSG00000124831	ENSP00000409431	9208	LRRFIP1	-0.210698	Cluster 6	Clustered	5.89756	H__sapiens__1_-706579	query	LRRFIP1	2.1697	NM_004735	NP_004726	0.810019	FALSE	H__sapiens__1_-706579	5144	HUFI-1	Q32MZ4
132	carboxylic acid catabolic process|small molecule catabolic process|oxidoreductase activity, acting on the aldehyde or oxo group of donors|cofactor binding|mitochondrial matrix|organic acid catabolic process|alpha-amino acid metabolic process|cellular amino acid catabolic process	GO:0046395|GO:0044282|GO:0016903|GO:0048037|GO:0005759|GO:0016054|GO:1901605|GO:0009063	36.9809	2.88024	-131	0.0015456	32	0.333333	0.0221962	ENSG00000119711	ENSP00000452081	4329	ALDH6A1	-0.224416	Cluster 6	Clustered	5.89011	H__sapiens__1_-705933	query	ALDH6A1	2.03939	NM_005589	NP_005580	0.798983	FALSE	H__sapiens__1_-705933	550	MMSDH	Q02252
133	response to topologically incorrect protein|ion channel complex|transmembrane transporter complex|response to unfolded protein|unfolded protein binding|blood microparticle	GO:0035966|GO:0034702|GO:1902495|GO:0006986|GO:0051082|GO:0072562	139.321	4.17745	-103	0.0016129	48	0.333333	0.0337941	ENSG00000126803	ENSP00000378199	3306	HSPA2	-0.191022	Cluster 5	Clustered	7.64706	H__sapiens__1_-706842	query	HSPA2	2.12121	NM_021979	NP_068814	0.826114	FALSE	H__sapiens__1_-706842	2108		P54652
135	response to topologically incorrect protein|response to unfolded protein	GO:0035966|GO:0006986	244.168	3.66247	-80	0.00167785	73	0.5	0.0509262	ENSG00000068971	ENSP00000437088	5526	PPP2R5B	-0.224776	Cluster 6	Clustered	6.35893	H__sapiens__1_-702035	query	PPP2R5B	2.19394	NM_006244	NP_006235	0.798695	FALSE	H__sapiens__1_-702035	4088	PR61B	Q15173
136	sensory perception	GO:0007600	152.338	3.30978	-94	0.00163934	59	0.333333	0.0350002	ENSG00000168081	ENSP00000430145	5368	PNOC	-0.211757	Cluster 1	Clustered	20	H__sapiens__1_-713278	query	PNOC	2.15152	NM_006228	NP_006219	0.809161	FALSE	H__sapiens__1_-713278	2234	PPNOC	Q13519
138	carboxylic acid catabolic process|dicarboxylic acid catabolic process|neurotransmitter uptake|glutamine family amino acid metabolic process|neurotransmitter transport|dicarboxylic acid metabolic process|alpha-amino acid catabolic process|glutamate metabolic process|alpha-amino acid metabolic process|cellular amino acid biosynthetic process|regulation of neurotransmitter levels|small molecule cata…	GO:0046395|GO:0043649|GO:0001504|GO:0009064|GO:0006836|GO:0043648|GO:1901606|GO:0006536|GO:1901605|GO:0008652|GO:0001505|GO:0044282|GO:1901607|GO:0016054|GO:0009065|GO:0009063	152.828	3.76577	-94	0.00163934	57	0.333333	0.0418953	ENSG00000135821	ENSP00000398320	2752	GLUL	-0.226492	Cluster 6	Clustered	6.69565	H__sapiens__1_-708138	query	GLUL	2.15152	NM_002065	NP_002056	0.797326	FALSE	H__sapiens__1_-708138	2496	GLNS	P15104
140	cellular response to xenobiotic stimulus|alcohol metabolic process|xenobiotic metabolic process|response to xenobiotic stimulus|vitamin D metabolic process|fat-soluble vitamin metabolic process	GO:0071466|GO:0006066|GO:0006805|GO:0009410|GO:0042359|GO:0006775	53.8412	5.03114	-122	0.00156495	27	0.333333	0.0181728	ENSG00000140465	ENSP00000482863	1543	CYP1A1	-0.22765		Unclustered	1.90476	H__sapiens__1_-708965	query	CYP1A1	2.06364	NM_001319217	NP_001306146	0.796403	FALSE	H__sapiens__1_-708965	780	P450DX	P04798
142	positive regulation of phospholipase activity|alcohol metabolic process|activation of phospholipase C activity|regulation of phospholipase activity|positive regulation of lipase activity|regulation of lipase activity|positive regulation of phospholipase C activity|phospholipase C activity|regulation of phospholipase C activity|phospholipase activity|lipase activity	GO:0010518|GO:0006066|GO:0007202|GO:0010517|GO:0060193|GO:0060191|GO:0010863|GO:0004629|GO:1900274|GO:0004620|GO:0016298	127.279	5.16645	-121	0.00156495	35	0.333333	0.0201231	ENSG00000137841	ENSP00000454025	5330	PLCB2	-0.230596		Unclustered	2.30769	H__sapiens__1_-708546	query	PLCB2	2.06364	NM_004573	NP_004564	0.79406	FALSE	H__sapiens__1_-708546	1938	FLJ38135	Q00722
144	sensory perception|platelet degranulation|exocytosis|platelet activation	GO:0007600|GO:0002576|GO:0006887|GO:0030168	545.644	2.96537	-41	0.00179533	124	0.5	0.0870078	ENSG00000071127	ENSP00000427687	9948	WDR1	-0.232116	Cluster 5	Clustered	8.45431	H__sapiens__1_-702122	query	WDR1	2.31212	NM_017491	NP_059830	0.792854	FALSE	H__sapiens__1_-702122	9260		O75083
146	positive regulation of protein serine/threonine kinase activity|negative regulation of protein serine/threonine kinase activity|hexose metabolic process|regulation of blood pressure|negative regulation of protein transport|regulation of fatty acid metabolic process|regulation of cell adhesion|negative regulation of ERK1 and ERK2 cascade|response to drug|negative regulation of multicellular organi…	GO:0071902|GO:0071901|GO:0019318|GO:0008217|GO:0051224|GO:0019217|GO:0030155|GO:0070373|GO:0042493|GO:0051241|GO:0008015|GO:0006109|GO:0002521|GO:0033673|GO:0044262|GO:0043405|GO:0051348|GO:0005996|GO:0010563|GO:0016054|GO:0014910|GO:0033028|GO:0043409|GO:0046364|GO:0010906|GO:0002761|GO:0033157|GO:1901653|GO:0032637|GO:0031406|GO:0006869|GO:0071375|GO:0051098|GO:0045834|GO:0030100|GO:0044057|GO:…	91.1528	4.58391	-115	0.00158479	36	0.333333	0.0216964	ENSG00000181092	ENSP00000389814	9370	ADIPOQ	-0.234761	Cluster 8	Clustered	4.25731	H__sapiens__1_-716002	query	ADIPOQ	2.08788	NM_004797	NP_004788	0.79076	FALSE	H__sapiens__1_-716002	1176	GBP28	Q15848
147	intracellular receptor signaling pathway	GO:0030522	142.038	3.30527	-100	0.00162338	54	0.333333	0.0353449	ENSG00000119508	ENSP00000482027	8013	NR4A3	-0.193112	Cluster 9	Seed	3.63531	H__sapiens__1_-705894	query	NR4A3	2.13333	NM_173200	NP_775292	0.82439	FALSE	H__sapiens__1_-705894	1970	MINOR	Q92570
149	positive regulation of epithelial cell proliferation|immune response-regulating cell surface receptor signaling pathway|positive regulation of endothelial cell proliferation|regulation of epithelial cell proliferation|phosphatidylinositol-mediated signaling|epithelial cell proliferation|cellular response to fibroblast growth factor stimulus|neurotrophin signaling pathway|intracellular receptor si…	GO:0050679|GO:0002768|GO:0001938|GO:0050678|GO:0048015|GO:0050673|GO:0044344|GO:0038179|GO:0030522|GO:0007173|GO:0001936|GO:0038095|GO:0001525|GO:0008543|GO:0071774|GO:0038127|GO:0048011|GO:0048017|GO:0038093|GO:0001935	85.8936	3.08383	-110	0.00159744	47	0.333333	0.0293917	ENSG00000123358	ENSP00000457070	3164	NR4A1	-0.232808	Cluster 7	Clustered	4.95074	H__sapiens__1_-706358	query	NR4A1	2.10303	NM_173157	NP_775180	0.792305	FALSE	H__sapiens__1_-706358	1398	NUR77	P22736
151	cellular response to xenobiotic stimulus|xenobiotic metabolic process|response to xenobiotic stimulus|forebrain development|diencephalon development|oxidoreductase activity, acting on the CH-NH2 group of donors|substantia nigra development|subthalamus development|brain development|mitochondrial membrane	GO:0071466|GO:0006805|GO:0009410|GO:0030900|GO:0021536|GO:0016638|GO:0021762|GO:0021539|GO:0007420|GO:0031966	216.523	3.65291	-89	0.00165289	65	0.333333	0.0429102	ENSG00000069535	ENSP00000367309	4129	MAOB	-0.235901	Cluster 8	Clustered	3.79762	H__sapiens__1_-702054	query	MAOB	2.16667	NM_000898	NP_000889	0.789859	FALSE	H__sapiens__1_-702054	3112		P27338
152			17.4936	3.42648	-135	0.00153139	20	0.333333	0.0157484	ENSG00000169057	ENSP00000489847	4204	MECP2	-0.206733		Unclustered	3.35294	H__sapiens__1_-713505	query	MECP2	2.02121	NM_004992	NP_004983	0.813237	FALSE	H__sapiens__1_-713505	270	RTT	P51608
154	regulation of calcium ion transport|calcium ion transport|dendrite development|regulation of long-term neuronal synaptic plasticity|dendritic spine organization|regulation of synapse structure and activity|muscle system process|endocytic vesicle|developmental maturation|dendritic spine morphogenesis|dendritic spine development|regulation of synaptic transmission|vesicle membrane|regulation of met…	GO:0051924|GO:0006816|GO:0016358|GO:0048169|GO:0097061|GO:0050803|GO:0003012|GO:0030139|GO:0021700|GO:0060997|GO:0060996|GO:0050804|GO:0012506|GO:0010959|GO:0070838|GO:0048167|GO:0072511|GO:0090257|GO:0071346|GO:0030659|GO:0044057|GO:0010975|GO:0030666|GO:0050767|GO:0043500|GO:0051960|GO:0034341|GO:0050808|GO:0043269|GO:0048168	340.261	2.07855	-57	0.0017452	120	0.5	0.0691077	ENSG00000058404	ENSP00000428912	816	CAMK2B	-0.236212	Cluster 4	Clustered	12.1154	H__sapiens__1_-701762	query	CAMK2B	2.26364	NM_172084	NP_742081	0.789613	FALSE	H__sapiens__1_-701762	6140	CAMKB	Q13554
156	monosaccharide biosynthetic process|hexose metabolic process|glucose metabolic process|glucose catabolic process|carbohydrate catabolic process|hexose catabolic process|isomerase activity|glycolysis|monosaccharide catabolic process|single-organism carbohydrate catabolic process|gluconeogenesis|carbohydrate biosynthetic process|monosaccharide metabolic process|hexose biosynthetic process	GO:0046364|GO:0019318|GO:0006006|GO:0006007|GO:0016052|GO:0019320|GO:0016853|GO:0006096|GO:0046365|GO:0044724|GO:0006094|GO:0016051|GO:0005996|GO:0019319	227.422	1.62371	-61	0.0017331	113	0.333333	0.0744401	ENSG00000111669	ENSP00000484435	7167	TPI1	-0.237193	Cluster 1	Clustered	18.8018	H__sapiens__1_-704904	query	TPI1	2.25152	NM_001258026	NP_001244955	0.788839	FALSE	H__sapiens__1_-704904	5200		P60174
157	response to reactive oxygen species|antioxidant activity|removal of superoxide radicals|reactive oxygen species metabolic process|response to oxidative stress|response to superoxide|hydrogen peroxide metabolic process|response to hydrogen peroxide|cellular response to reactive oxygen species|cellular response to hydrogen peroxide|cellular response to superoxide|response to inorganic substance|sup…	GO:0000302|GO:0016209|GO:0019430|GO:0072593|GO:0006979|GO:0000303|GO:0042743|GO:0042542|GO:0034614|GO:0070301|GO:0071451|GO:0010035|GO:0006801|GO:0004601|GO:0042744|GO:0034599|GO:0016684	263.962	3.40333	-86	0.00166113	76	0.333333	0.0528788	ENSG00000167815	ENSP00000334063	7001	PRDX2	-0.212079	Cluster 4	Clustered	12.111	H__sapiens__1_-713206	query	PRDX2	2.17576	NM_005809	NP_005800	0.808901	FALSE	H__sapiens__1_-713206	4298	TSA	P32119
159	monosaccharide biosynthetic process|hexose metabolic process|glucose metabolic process|glucose catabolic process|regulation of cellular carbohydrate metabolic process|regulation of glucose metabolic process|protein kinase binding|regulation of coenzyme metabolic process|carbohydrate catabolic process|hexose catabolic process|isomerase activity|glycolysis|monosaccharide catabolic process|NADP meta…	GO:0046364|GO:0019318|GO:0006006|GO:0006007|GO:0010675|GO:0010906|GO:0019901|GO:0051196|GO:0016052|GO:0019320|GO:0016853|GO:0006096|GO:0046365|GO:0006739|GO:0044724|GO:0006109|GO:0006094|GO:0044275|GO:0044262|GO:0016051|GO:0043603|GO:0005996|GO:0051193|GO:0019319	282.649	3.1732	-71	0.00170358	84	0.333333	0.0646477	ENSG00000171314	ENSP00000359991	5223	PGAM1	-0.219519	Cluster 4	Clustered	12.3529	H__sapiens__1_-714033	query	PGAM1	2.22121	NM_002629	NP_002620	0.802905	FALSE	H__sapiens__1_-714033	5538	PGAMA	P18669
161	neurotransmitter metabolic process|behavior|carboxylic acid catabolic process|transferase activity, transferring nitrogenous groups|response to organic cyclic compound|single-organism behavior|cofactor binding|neurotransmitter transport|mitochondrial matrix|signal release|adult behavior|regulation of neurotransmitter levels|small molecule catabolic process|response to ammonium ion|response to alk…	GO:0042133|GO:0007610|GO:0046395|GO:0016769|GO:0014070|GO:0044708|GO:0048037|GO:0006836|GO:0005759|GO:0023061|GO:0030534|GO:0001505|GO:0044282|GO:0060359|GO:0043279|GO:0007269|GO:0016054|GO:0009063	354.16	3.06021	-63	0.00172712	96	0.5	0.0651535	ENSG00000183044	ENSP00000456392	18	ABAT	-0.237675	Cluster 6	Clustered	5.90973	H__sapiens__1_-716400	query	ABAT	2.24545	NM_020686	NP_065737	0.788459	FALSE	H__sapiens__1_-716400	5532	GABAT	P80404
164	'de novo' protein folding|protein folding|microtubule|'de novo' posttranslational protein folding	GO:0006458|GO:0006457|GO:0005874|GO:0051084	289.076	3.22902	-71	0.00170358	86	0.333333	0.0639408	ENSG00000258947	ENSP00000485859	10381	TUBB3	-0.241847	Cluster 3	Clustered	10.5603	H__sapiens__1_-747857	query	TUBB3	2.22121	NM_006086	NP_006077	0.785177	FALSE	H__sapiens__1_-747857	5002	FEOM3	Q13509
166	receptor-mediated endocytosis	GO:0006898	195.181	2.04498	-85	0.00166389	87	0.333333	0.0471328	ENSG00000106976	ENSP00000490555	1759	DNM1	-0.241942	Cluster 5	Clustered	9.0081	H__sapiens__1_-704355	query	DNM1	2.17879	NM_004408	NP_004399	0.785102	FALSE	H__sapiens__1_-704355	3054	DNM	Q05193
167	cellular metal ion homeostasis|regulation of purine nucleotide biosynthetic process|negative regulation of protein transport|negative regulation of cAMP metabolic process|regulation of calcium ion transmembrane transporter activity|drug binding|regulation of adenylate cyclase activity|icosanoid transport|regulation of ion transmembrane transport|long-chain fatty acid transport|regulation of neuro…	GO:0006875|GO:1900371|GO:0051224|GO:0030815|GO:1901019|GO:0008144|GO:0045761|GO:0071715|GO:0034765|GO:0015909|GO:0001505|GO:0050709|GO:0032412|GO:0072507|GO:0045471|GO:0055065|GO:0030594|GO:0010959|GO:0009306|GO:0032409|GO:0009712|GO:1901385|GO:0043406|GO:0006869|GO:1901571|GO:0015849|GO:0030803|GO:0030808|GO:0043410|GO:0015850|GO:0034762|GO:0072503|GO:0018958|GO:0097305|GO:0015872|GO:0030814|GO:…	144.493	2.7295	-88	0.00165289	65	0.333333	0.04195	ENSG00000276825	ENSP00000478431	1815	DRD4	-0.208749	Cluster 1	Clustered	22.5413	H__sapiens__1_-702056	query	DRD4	2.16667	NM_000797	NP_000788	0.811599	FALSE	H__sapiens__1_-702056	2494		P21917
169	cellular response to drug|transcription regulatory region DNA binding|regulatory region DNA binding|covalent chromatin modification|positive regulation of transporter activity|response to drug|histone modification|regulatory region nucleic acid binding|regulation of transporter activity	GO:0035690|GO:0044212|GO:0000975|GO:0016569|GO:0032411|GO:0042493|GO:0016570|GO:0001067|GO:0032409	234.613	5.33406	-97	0.00163132	52	0.333333	0.033643	ENSG00000118058	ENSP00000436786	4297	KMT2A	-0.242269	Cluster 6	Clustered	6.35294	H__sapiens__1_-705758	query	KMT2A	2.14242	NM_005933	NP_005924	0.784845	FALSE	H__sapiens__1_-705758	3282	TRX1	Q03164
171	G-protein coupled receptor signaling pathway, coupled to cyclic nucleotide second messenger|protein import into nucleus|nuclear import|protein targeting to nucleus|nucleocytoplasmic transport|protein import into nucleus, translocation|protein localization to nucleus|G-protein coupled peptide receptor activity|protein import|G-protein coupled receptor activity|single-organism nuclear import|peptid…	GO:0007187|GO:0006606|GO:0051170|GO:0044744|GO:0006913|GO:0000060|GO:0034504|GO:0008528|GO:0017038|GO:0004930|GO:1902593|GO:0001653|GO:0051169|GO:0007200	472.409	3.4959	-66	0.00171821	97	0.333333	0.0562323	ENSG00000116329	ENSP00000477970	4985	OPRD1	-0.243738	Cluster 1	Clustered	21.5938	H__sapiens__1_-705547	query	OPRD1	2.23636	NM_000911	NP_000902	0.783693	FALSE	H__sapiens__1_-705547	6502		P41143
173	mitochondrial membrane organization|regulation of protein insertion into mitochondrial membrane involved in apoptotic signaling pathway|protein insertion into mitochondrial membrane involved in apoptotic signaling pathway|protein insertion into mitochondrial membrane|regulation of mitochondrial membrane permeability|establishment of protein localization to mitochondrion|positive regulation of mit…	GO:0007006|GO:1900739|GO:0001844|GO:0051204|GO:0046902|GO:0072655|GO:1902110|GO:1902108|GO:0008637|GO:0032386|GO:0038095|GO:0008287|GO:0010821|GO:0010822|GO:0097193|GO:0002768|GO:0005516|GO:0035794|GO:0007005|GO:0097345|GO:1902686|GO:0090150|GO:0070201|GO:1901028|GO:1900740|GO:2001233|GO:0010638|GO:0038093|GO:0051205	262.418	3.11921	-78	0.0016835	82	0.333333	0.0524553	ENSG00000221823	ENSP00000387216	5534	PPP3R1	-0.229156	Cluster 6	Clustered	5.86286	H__sapiens__1_-725293	query	PPP3R1	2.2	NM_000945	NP_000936	0.795204	FALSE	H__sapiens__1_-725293	3946	CNB1	P63098
175	carbohydrate kinase activity|glycolysis|hexose metabolic process|glucose metabolic process|glucose catabolic process|monosaccharide catabolic process|single-organism carbohydrate catabolic process|carbohydrate catabolic process|cellular carbohydrate metabolic process|hexose catabolic process|monosaccharide metabolic process|carbohydrate phosphorylation	GO:0019200|GO:0006096|GO:0019318|GO:0006006|GO:0006007|GO:0046365|GO:0044724|GO:0016052|GO:0044262|GO:0019320|GO:0005996|GO:0046835	328.519	3.05343	-62	0.0017301	97	0.5	0.0682747	ENSG00000067057	ENSP00000477128	5214	PFKP	-0.244495	Cluster 5	Clustered	8.59165	H__sapiens__1_-701969	query	PFKP	2.24848	NM_002627	NP_002618	0.7831	FALSE	H__sapiens__1_-701969	5340	PFKF	Q01813
179	cellular metal ion homeostasis|lysosomal membrane|ferric iron transport|transferrin transport|cellular response to peptide|response to peptide|cellular response to peptide hormone stimulus|cellular response to insulin stimulus|transition metal ion homeostasis|response to peptide hormone|iron ion homeostasis|cellular iron ion homeostasis|vacuolar membrane|proton-transporting two-sector ATPase comp…	GO:0006875|GO:0005765|GO:0015682|GO:0033572|GO:1901653|GO:1901652|GO:0071375|GO:0032869|GO:0055076|GO:0043434|GO:0055072|GO:0006879|GO:0005774|GO:0016469|GO:0055065|GO:0000041|GO:0032868|GO:0030003|GO:0072512|GO:0006826|GO:0044437|GO:0008286|GO:0006873|GO:0046916	316.52	3.01622	-74	0.00169492	93	0.5	0.0576514	ENSG00000114573	ENSP00000420146	523	ATP6V1A	-0.244527	Cluster 3	Clustered	10.229	H__sapiens__1_-705286	query	ATP6V1A1	2.21212	NM_001690	NP_001681	0.783075	FALSE	H__sapiens__1_-705286	5482	Vma1	P38606
180	guanyl ribonucleotide binding|endocytic vesicle|guanyl nucleotide binding|GTPase activity|early endosome	GO:0032561|GO:0030139|GO:0019001|GO:0003924|GO:0005769	19.7833	2.97018	-139	0.00151515	22	0.333333	0.0144903	ENSG00000124209	ENSP00000244040	57403	RAB22A	-0.168052		Unclustered	2.02632	H__sapiens__1_-706466	query	RAB22A	2	NM_020673	NP_065724	0.84531	FALSE	H__sapiens__1_-706466	312		Q9UL26
184	epithelial cell differentiation|gated channel activity|ion channel activity|channel activity|nucleoid|passive transmembrane transporter activity|substrate-specific channel activity|mitochondrial matrix|mitochondrial nucleoid	GO:0030855|GO:0022836|GO:0005216|GO:0015267|GO:0009295|GO:0022803|GO:0022838|GO:0005759|GO:0042645	308.453	1.85208	-52	0.00176056	126	0.333333	0.0851733	ENSG00000213585	ENSP00000390129	7416	VDAC1	-0.236889	Cluster 2	Clustered	18.1111	H__sapiens__1_-723620	query	VDAC1	2.27879	NM_003374	NP_003365	0.789079	FALSE	H__sapiens__1_-723620	6824	PORIN	P21796
186	cellular metal ion homeostasis|G-protein coupled receptor signaling pathway, coupled to cyclic nucleotide second messenger|sensory perception|positive regulation of cytosolic calcium ion concentration|adenylate cyclase-inhibiting G-protein coupled receptor signaling pathway|cellular calcium ion homeostasis|adenylate cyclase-modulating G-protein coupled receptor signaling pathway|cytosolic calcium…	GO:0006875|GO:0007187|GO:0007600|GO:0007204|GO:0007193|GO:0006874|GO:0007188|GO:0051480|GO:0008528|GO:0019233|GO:0072503|GO:0055074|GO:0072507|GO:0004930|GO:0001653|GO:0055065|GO:0030003|GO:0006873	156.503	2.96598	-94	0.00163666	62	0.333333	0.0353461	ENSG00000277044	ENSP00000487083	4987	OPRL1	-0.245817	Cluster 1	Clustered	22.7877	H__sapiens__1_-706649	query	OPRL1	2.14848	NM_182647	NP_872588	0.782065	FALSE	H__sapiens__1_-706649	2372	ORL1	P41146
188	antigen processing and presentation of exogenous peptide antigen via MHC class II|microtubule-based movement	GO:0019886|GO:0007018	189.212	2.42281	-89	0.00165289	74	0.333333	0.0389365	ENSG00000155980	ENSP00000408979	3798	KIF5A	-0.246059	Cluster 5	Clustered	8.36782	H__sapiens__1_-710924	query	KIF5A	2.16667	NM_004984	NP_004975	0.781876	FALSE	H__sapiens__1_-710924	2952	SPG10	Q12840
190	epithelial cell differentiation|response to lipid|cellular response to xenobiotic stimulus|xenobiotic metabolic process|carboxylic acid binding|response to organic cyclic compound|glutathione derivative biosynthetic process|peptide metabolic process|endothelial cell development|amino acid binding|transferase activity, transferring alkyl or aryl (other than methyl) groups|response to steroid hormo…	GO:0030855|GO:0033993|GO:0071466|GO:0006805|GO:0031406|GO:0014070|GO:1901687|GO:0006518|GO:0001885|GO:0016597|GO:0016765|GO:0048545|GO:0009410|GO:0043177|GO:0002064|GO:0006575|GO:0004364|GO:0043603|GO:0006749|GO:1901685	77.2632	2.97825	-116	0.00158228	41	0.333333	0.0276222	ENSG00000134202	ENSP00000444978	2947	GSTM3	-0.247071		Unclustered	3.23441	H__sapiens__1_-707838	query	GSTM3	2.08485	NM_000849	NP_000840	0.781085	FALSE	H__sapiens__1_-707838	1188	GST5	P21266
192	behavior|active transmembrane transporter activity|forebrain development|neurotransmitter uptake|neurotransmitter transport|inorganic cation transmembrane transporter activity|monoamine transport|negative regulation of multicellular organismal process|regulation of neurotransmitter levels|metal ion transmembrane transporter activity|multi-organism behavior|regulation of growth|diencephalon develo…	GO:0007610|GO:0022804|GO:0030900|GO:0001504|GO:0006836|GO:0022890|GO:0015844|GO:0051241|GO:0001505|GO:0046873|GO:0051705|GO:0040008|GO:0021536|GO:0007420	114.813	4.23137	-108	0.00160256	41	0.5	0.0241789	ENSG00000108576	ENSP00000463172	6532	SLC6A4	-0.248985	Cluster 9	Clustered	2.99275	H__sapiens__1_-704531	query	SLC6A4	2.10909	NM_001045	NP_001036	0.779591	FALSE	H__sapiens__1_-704531	1758	SERT1	P31645
193	positive regulation of protein serine/threonine kinase activity|positive regulation of cell migration|peptidyl-tyrosine modification|behavior|activation of MAPK activity|negative regulation of phosphorylation|receptor metabolic process|positive regulation of response to external stimulus|peptidyl-serine modification|growth factor activity|regulation of receptor internalization|regulation of pepti…	GO:0071902|GO:0030335|GO:0018212|GO:0007610|GO:0000187|GO:0042326|GO:0043112|GO:0032103|GO:0018209|GO:0008083|GO:0002090|GO:0033135|GO:0045807|GO:0050731|GO:0006898|GO:0051272|GO:0033138|GO:0043405|GO:0010563|GO:0043406|GO:0060627|GO:2000147|GO:0031623|GO:0032147|GO:0018108|GO:0030100|GO:0018105|GO:0050730|GO:0043410|GO:0045936|GO:0048260|GO:0001933|GO:0048259|GO:0071900|GO:0002092|GO:0040017|GO:…	314.573	5.80523	-95	0.00163666	53	0.333333	0.030804	ENSG00000185652	ENSP00000397297	4908	NTF3	-0.200535	Cluster 9	Clustered	3.44381	H__sapiens__1_-717049	query	NTF3	2.14848	NM_002527	NP_002518	0.818293	FALSE	H__sapiens__1_-717049	4320	NGF2	P20783
195	lysosomal membrane|nuclear import|negative regulation of phosphorylation|extrinsic component of membrane|protein localization to nucleus|regulation of phospholipase C activity|regulation of protein import into nucleus|adenylate cyclase-activating G-protein coupled receptor signaling pathway|positive regulation of lipase activity|regulation of intracellular transport|negative regulation of kinase …	GO:0005765|GO:0051170|GO:0042326|GO:0019898|GO:0034504|GO:1900274|GO:0042306|GO:0007189|GO:0060193|GO:0032386|GO:0033673|GO:1902593|GO:0010863|GO:0044437|GO:0051348|GO:0010563|GO:0007187|GO:0031647|GO:0051223|GO:0007215|GO:1900180|GO:0006606|GO:0046822|GO:0033157|GO:0010517|GO:0007212|GO:0006913|GO:0007188|GO:0031683|GO:0031234|GO:0060191|GO:0030168|GO:0045936|GO:0019897|GO:0006469|GO:0010518|GO:…	651.75	2.74367	-41	0.00179533	137	0.5	0.0783267	ENSG00000156052	ENSP00000391501	2776	GNAQ	-0.252976	Cluster 1	Clustered	21.9203	H__sapiens__1_-710934	query	GNAQ	2.31212	NM_002072	NP_002063	0.776486	FALSE	H__sapiens__1_-710934	9766	GAQ	P50148
200	immune response-activating cell surface receptor signaling pathway|immune response-regulating cell surface receptor signaling pathway involved in phagocytosis|immune response-regulating cell surface receptor signaling pathway|Fc-gamma receptor signaling pathway involved in phagocytosis|phagocytosis|Fc-gamma receptor signaling pathway|Fc receptor mediated stimulatory signaling pathway|Fc receptor …	GO:0002429|GO:0002433|GO:0002768|GO:0038096|GO:0006909|GO:0038094|GO:0002431|GO:0038093	314.246	3.48037	-77	0.00168634	83	0.333333	0.0515233	ENSG00000129219	ENSP00000461459	5338	PLD2	-0.255026	Cluster 7	Clustered	5.48309	H__sapiens__1_-707103	query	PLD2	2.20303	NM_002663	NP_002654	0.774896	FALSE	H__sapiens__1_-707103	5198		O14939
201			254.199	4.53571	-91	0.00164745	60	0.333333	0.0384601	ENSG00000145012	ENSP00000482617	4026	LPP	-0.234824	Cluster 8	Clustered	4.34409	H__sapiens__1_-709640	query	LPP	2.16061	NM_005578	NP_005569	0.79071	FALSE	H__sapiens__1_-709640	3760		Q93052
203			236.19	3.07323	-84	0.00166389	76	0.333333	0.0455742	ENSG00000131095	ENSP00000468500	2670	GFAP	-0.255147	Cluster 3	Clustered	10.3125	H__sapiens__1_-707385	query	GFAP	2.17879	NM_002055	NP_002046	0.774803	FALSE	H__sapiens__1_-707385	3604	FLJ45472	P14136
204	protein kinase regulator activity|kinase regulator activity|striated muscle tissue development|muscle cell differentiation|cardiac muscle tissue development|regulation of cell adhesion|growth factor activity|regulation of protein tyrosine kinase activity|muscle tissue development|negative regulation of signal transduction in absence of ligand|positive regulation of peptidyl-tyrosine phosphorylati…	GO:0019887|GO:0019207|GO:0014706|GO:0042692|GO:0048738|GO:0030155|GO:0008083|GO:0061097|GO:0060537|GO:1901099|GO:0050731|GO:0030546|GO:0040008|GO:0016324|GO:0051146|GO:0048589|GO:0008543|GO:0098590|GO:0032147|GO:0051098|GO:0045445|GO:0048015|GO:2001234|GO:0038179|GO:2001233|GO:0038127|GO:2001239|GO:2001236|GO:0030545|GO:0048011|GO:0033002|GO:0030855|GO:0018212|GO:2001237|GO:0051048|GO:0061098|GO:…	407.808	3.87132	-66	0.00171821	88	0.5	0.0595939	ENSG00000157168	ENSP00000486375	3084	NRG1	-0.183732	Cluster 6	Clustered	6.11111	H__sapiens__1_-711065	query	NRG1	2.23636	NM_013964	NP_039258	0.832159	FALSE	H__sapiens__1_-711065	6560	NRG1-IT2	Q02297
206	positive regulation of sequence-specific DNA binding transcription factor activity|response to interferon-gamma|endocytic vesicle|cellular response to interferon-gamma|cytoplasmic vesicle membrane|vesicle membrane|endocytic vesicle membrane	GO:0051091|GO:0034341|GO:0030139|GO:0071346|GO:0030659|GO:0012506|GO:0030666	421.25	1.98582	-58	0.00174216	133	0.5	0.0646767	ENSG00000070808	ENSP00000427580	815	CAMK2A	-0.255199	Cluster 3	Clustered	9.31412	H__sapiens__1_-702109	query	CAMK2A	2.26061	NM_171825	NP_741960	0.774763	FALSE	H__sapiens__1_-702109	6208	KIAA0968	Q9UQM7
210	protein phosphatase regulator activity|G2/M transition of mitotic cell cycle|protein phosphatase type 2A regulator activity|protein dephosphorylation|cell cycle G2/M phase transition|protein phosphatase type 2A complex|protein serine/threonine phosphatase complex|phosphatase regulator activity	GO:0019888|GO:0000086|GO:0008601|GO:0006470|GO:0044839|GO:0000159|GO:0008287|GO:0019208	214.624	2.96231	-81	0.00167504	81	0.333333	0.054437	ENSG00000221914	ENSP00000486025	5520	PPP2R2A	-0.255438	Cluster 6	Clustered	6.67442	H__sapiens__1_-725328	query	PPP2R2A	2.19091	NM_002717	NP_002708	0.774577	FALSE	H__sapiens__1_-725328	3792	PR55A	P63151
212	acetyl-CoA biosynthetic process|regulation of coenzyme metabolic process|regulation of acyl-CoA biosynthetic process|oxidoreductase activity, acting on the aldehyde or oxo group of donors|acyl-CoA biosynthetic process|acetyl-CoA biosynthetic process from pyruvate|regulation of fatty acid metabolic process|oxidoreductase complex|mitochondrial matrix|cellular respiration|pyruvate metabolic process|…	GO:0006085|GO:0051196|GO:0050812|GO:0016903|GO:0071616|GO:0006086|GO:0019217|GO:1990204|GO:0005759|GO:0045333|GO:0006090|GO:0006099|GO:0010510|GO:0035384|GO:0006084|GO:0015980|GO:0019216|GO:0051193|GO:0009060	392.583	3.09072	-59	0.00173913	106	0.333333	0.074812	ENSG00000168291	ENSP00000419580	5162	PDHB	-0.255904	Cluster 2	Clustered	14.7142	H__sapiens__1_-713324	query	PDHB	2.25758	NM_001315536	NP_001302465	0.774216	FALSE	H__sapiens__1_-713324	6764		P11177
214	negative regulation of peptidase activity|enzyme inhibitor activity|regulation of endopeptidase activity|regulation of peptidase activity|negative regulation of endopeptidase activity	GO:0010466|GO:0004857|GO:0052548|GO:0052547|GO:0010951	116.477	3.745	-97	0.00163132	51	0.333333	0.0422155	ENSG00000160213	ENSP00000291568	1476	CSTB	-0.256241	Cluster 3	Clustered	10.641	H__sapiens__1_-711445	query	CSTB	2.14242	NM_000100	NP_000091	0.773956	FALSE	H__sapiens__1_-711445	2022	STFB	P04080
219	glycolysis|hexose metabolic process|glucose metabolic process|glucose catabolic process|monosaccharide catabolic process|MHC class II protein complex binding|single-organism carbohydrate catabolic process|carbohydrate catabolic process|hexose catabolic process|monosaccharide metabolic process|MHC protein complex binding|antigen binding	GO:0006096|GO:0019318|GO:0006006|GO:0006007|GO:0046365|GO:0023026|GO:0044724|GO:0016052|GO:0019320|GO:0005996|GO:0023023|GO:0003823	302.608	1.9425	-58	0.00174216	120	0.333333	0.0772084	ENSG00000067225	ENSP00000457830	5315	PKM	-0.249579	Cluster 4	Clustered	13.0038	H__sapiens__1_-701981	query	PKM2	2.26061	NM_182471	NP_872271	0.779129	FALSE	H__sapiens__1_-701981	6130	THBP1	P14618
221	electron transport chain|oxidative phosphorylation|striated muscle tissue development|cardiac muscle tissue development|oxidoreductase complex|respiratory chain|muscle tissue development|respiratory electron transport chain|cellular respiration|organelle inner membrane|mitochondrial respiratory chain|mitochondrial membrane part|energy derivation by oxidation of organic compounds|mitochondrial mem…	GO:0022900|GO:0006119|GO:0014706|GO:0048738|GO:1990204|GO:0070469|GO:0060537|GO:0022904|GO:0045333|GO:0019866|GO:0005746|GO:0044455|GO:0015980|GO:0031966|GO:0005743	253.108	2.45505	-79	0.00168067	90	0.333333	0.0543478	ENSG00000178127	ENSP00000464504	4729	NDUFV2	-0.256983	Cluster 4	Clustered	13.878	H__sapiens__1_-715440	query	NDUFV2	2.19697	NM_021074	NP_066552	0.773382	FALSE	H__sapiens__1_-715440	3812	CI-24k	P19404
223	G-protein coupled receptor signaling pathway, coupled to cyclic nucleotide second messenger|sensory perception|behavior|adenylate cyclase-inhibiting G-protein coupled receptor signaling pathway|adenylate cyclase-modulating G-protein coupled receptor signaling pathway|locomotory behavior|response to virus|regulation of system process|G-protein coupled peptide receptor activity|sensory perception o…	GO:0007187|GO:0007600|GO:0007610|GO:0007193|GO:0007188|GO:0007626|GO:0009615|GO:0044057|GO:0008528|GO:0019233|GO:0004930|GO:0001653|GO:0007200	374.451	3.07529	-66	0.00171821	96	0.333333	0.0557344	ENSG00000082556	ENSP00000483000	4986	OPRK1	-0.257076	Cluster 1	Clustered	23	H__sapiens__1_-702550	query	OPRK1	2.23636	NM_001318497	NP_001305426	0.77331	FALSE	H__sapiens__1_-702550	5374	OPRK	P41145
226	sensory perception|carboxylic acid transport|hormone transport|regulation of hormone levels|organic acid transport|cofactor binding	GO:0007600|GO:0046942|GO:0009914|GO:0010817|GO:0015849|GO:0048037	192.682	4.1736	-93	0.00164204	59	0.333333	0.0397892	ENSG00000103316	ENSP00000461904	1428	CRYM	-0.25141	Cluster 7	Clustered	5.19496	H__sapiens__1_-703778	query	CRYM	2.15455	NM_001888	NP_001879	0.777704	FALSE	H__sapiens__1_-703778	2730	DFNA40	Q14894
228	hexose metabolic process|glucose metabolic process|glucose catabolic process|carbohydrate catabolic process|forebrain development|hexose catabolic process|subthalamus development|pyruvate metabolic process|glycolysis|monosaccharide catabolic process|single-organism carbohydrate catabolic process|diencephalon development|substantia nigra development|monosaccharide metabolic process|brain developme…	GO:0019318|GO:0006006|GO:0006007|GO:0016052|GO:0030900|GO:0019320|GO:0021539|GO:0006090|GO:0006096|GO:0046365|GO:0044724|GO:0021536|GO:0021762|GO:0005996|GO:0007420	248.212	1.89238	-58	0.00174216	111	0.333333	0.076943	ENSG00000134333	ENSP00000486249	3939	LDHA	-0.258073	Cluster 2	Clustered	17.7455	H__sapiens__1_-707874	query	LDHA	2.26061	NM_005566	NP_005557	0.772539	FALSE	H__sapiens__1_-707874	5214		P00338
231	electron transport chain|oxidative phosphorylation|response to oxidative stress|oxidoreductase complex|respiratory chain|respiratory electron transport chain|cellular respiration|organelle inner membrane|mitochondrial respiratory chain|mitochondrial membrane part|energy derivation by oxidation of organic compounds|mitochondrial membrane|mitochondrial inner membrane	GO:0022900|GO:0006119|GO:0006979|GO:1990204|GO:0070469|GO:0022904|GO:0045333|GO:0019866|GO:0005746|GO:0044455|GO:0015980|GO:0031966|GO:0005743	270.719	1.73373	-66	0.00171821	117	0.333333	0.0711106	ENSG00000158864	ENSP00000376018	4720	NDUFS2	-0.246391	Cluster 2	Clustered	18.0925	H__sapiens__1_-711273	query	NDUFS2	2.23636	NM_004550	NP_004541	0.781617	FALSE	H__sapiens__1_-711273	5118	CI-49	O75306
233	antioxidant activity|response to oxidative stress|phospholipase activity|lipase activity	GO:0016209|GO:0006979|GO:0004620|GO:0016298	408.26	3.29596	-65	0.00172117	99	0.333333	0.0660824	ENSG00000117592	ENSP00000342026	9588	PRDX6	-0.258746	Cluster 4	Clustered	12.4857	H__sapiens__1_-705716	query	PRDX6	2.23939	NM_004905	NP_004896	0.772019	FALSE	H__sapiens__1_-705716	5926	NSGPx	P30041
234	response to glucagon|cellular response to peptide|response to peptide|cellular response to peptide hormone stimulus|extrinsic component of cytoplasmic side of plasma membrane|extrinsic component of membrane|response to peptide hormone|GTPase activity|PDZ domain binding|cellular response to glucagon stimulus|extrinsic component of plasma membrane|heterotrimeric G-protein complex|energy reserve met…	GO:0033762|GO:1901653|GO:1901652|GO:0071375|GO:0031234|GO:0019898|GO:0043434|GO:0003924|GO:0030165|GO:0071377|GO:0019897|GO:0005834|GO:0006112|GO:0015980	273.013	2.50232	-73	0.00169779	97	0.333333	0.0575754	ENSG00000174021	ENSP00000359679	2787	GNG5	-0.222539	Cluster 1	Clustered	22.3915	H__sapiens__1_-714636	query	GNG5	2.21515	NM_005274	NP_005265	0.800484	FALSE	H__sapiens__1_-714636	4230		P63218
236	leukocyte differentiation|myeloid leukocyte differentiation	GO:0002521|GO:0002573	169.099	3.00358	-91	0.00164474	69	0.333333	0.0541363	ENSG00000124767	ENSP00000362463	2739	GLO1	-0.258041	Cluster 2	Clustered	16.0027	H__sapiens__1_-706562	query	GLO1	2.15758	NM_006708	NP_006699	0.772563	FALSE	H__sapiens__1_-706562	2984	GLOD1	Q04760
238	positive regulation of DNA metabolic process|regulation of neuron death|regulation of protein catabolic process|regulation of phospholipase C activity|neuron projection|perinuclear region of cytoplasm|neuron part|cellular response to fibroblast growth factor stimulus|regulation of cellular response to stress|cell-type specific apoptotic process|positive regulation of lipase activity|epidermal gro…	GO:0051054|GO:1901214|GO:0042176|GO:1900274|GO:0043005|GO:0048471|GO:0097458|GO:0044344|GO:0080135|GO:0097285|GO:0060193|GO:0007173|GO:1901215|GO:0060359|GO:0010863|GO:0043279|GO:0009895|GO:0008543|GO:0071774|GO:0051402|GO:0010517|GO:0043524|GO:0014070|GO:0060191|GO:0042177|GO:0030168|GO:0010518|GO:0007202|GO:0038179|GO:0070997|GO:0043523|GO:0038127|GO:0030425|GO:0048011	383.818	3.4646	-71	0.00170358	92	0.333333	0.054473	ENSG00000126583	ENSP00000471544	5582	PRKCG	-0.259406	Cluster 3	Clustered	10.1622	H__sapiens__1_-706820	query	PRKCG	2.22121	NM_002739	NP_002730	0.77151	FALSE	H__sapiens__1_-706820	5860	SCA14	P05129
241	neuron part|rhodopsin mediated signaling pathway|cellular response to radiation|cellular response to abiotic stimulus|cellular response to light stimulus|cell projection membrane|response to light stimulus|regulation of rhodopsin mediated signaling pathway|GTPase activity|plasma membrane region|response to radiation|regulation of G-protein coupled receptor protein signaling pathway	GO:0097458|GO:0016056|GO:0071478|GO:0071214|GO:0071482|GO:0031253|GO:0009416|GO:0022400|GO:0003924|GO:0098590|GO:0009314|GO:0008277	76.9801	1.32151	-98	0.00162866	70	0.333333	0.0345088	ENSG00000127928	ENSP00000401781	2792	GNGT1	-0.260013	Cluster 1	Clustered	22.3915	H__sapiens__1_-706947	query	GNGT1	2.13939	NM_021955	NP_068774	0.771042	FALSE	H__sapiens__1_-706947	1332	GNG1	P63211
243	tricarboxylic acid metabolic process|mitochondrial matrix|energy derivation by oxidation of organic compounds|cellular respiration|tricarboxylic acid cycle|aerobic respiration	GO:0072350|GO:0005759|GO:0015980|GO:0045333|GO:0006099|GO:0009060	242.042	1.59158	-59	0.00173913	119	0.333333	0.0787657	ENSG00000100412	ENSP00000379769	50	ACO2	-0.263623	Cluster 2	Seed	18.3462	H__sapiens__1_-703279	query	ACO2	2.25758	NM_001098	NP_001089	0.768263	FALSE	H__sapiens__1_-703279	5406	ACONM	Q99798
245	mitochondrial matrix|energy derivation by oxidation of organic compounds|cellular respiration|tricarboxylic acid cycle|aerobic respiration	GO:0005759|GO:0015980|GO:0045333|GO:0006099|GO:0009060	157.814	2.47535	-78	0.0016835	76	0.333333	0.0624559	ENSG00000062485	ENSP00000450403	1431	CS	-0.19195	Cluster 2	Clustered	16.2167	H__sapiens__1_-701817	query	CS	2.2	NM_004077	NP_004068	0.825348	FALSE	H__sapiens__1_-701817	3342		O75390
247	protein folding|isomerase activity	GO:0006457|GO:0016853	229.111	3.49508	-85	0.00166389	70	0.333333	0.0473177	ENSG00000089248	ENSP00000449018	10961	ERP29	-0.260922	Cluster 3	Clustered	11.2302	H__sapiens__1_-702808	query	ERP29	2.17879	NM_006817	NP_006808	0.770341	FALSE	H__sapiens__1_-702808	3600	PDIA9	P30040
249	cellular amino acid biosynthetic process|alpha-amino acid biosynthetic process|brain development|alpha-amino acid metabolic process	GO:0008652|GO:1901607|GO:0007420|GO:1901605	299.137	3.89684	-73	0.00169779	78	0.5	0.0543668	ENSG00000092621	ENSP00000358417	26227	PHGDH	-0.263989	Cluster 8	Clustered	4.10163	H__sapiens__1_-702955	query	PHGDH	2.21515	NM_006623	NP_006614	0.767982	FALSE	H__sapiens__1_-702955	4490	SERA	O43175
250	protein dephosphorylation	GO:0006470	179.905	3.1336	-83	0.00166945	69	0.333333	0.050435	ENSG00000142949	ENSP00000483557	5792	PTPRF	-0.225305	Cluster 8	Clustered	4.60073	H__sapiens__1_-709291	query	PTPRF	2.18485	NM_130440	NP_569707	0.798272	FALSE	H__sapiens__1_-709291	3400	LAR	P10586
252	positive regulation of cell migration|positive regulation of cell motility|positive regulation of epithelial cell migration|cytoplasmic vesicle membrane|exocytosis|endocytic vesicle membrane|secretory granule|phagocytosis|leukocyte mediated immunity|positive regulation of sequence-specific DNA binding transcription factor activity|positive regulation of cellular component movement|endocytic vesic…	GO:0030335|GO:2000147|GO:0010634|GO:0030659|GO:0006887|GO:0030666|GO:0030141|GO:0006909|GO:0002443|GO:0051091|GO:0051272|GO:0030139|GO:0045766|GO:0001525|GO:0040017|GO:0012506|GO:0002446	453.627	4.70664	-69	0.0017094	80	0.5	0.052143	ENSG00000138772	ENSP00000426591	306	ANXA3	-0.264182	Cluster 7	Clustered	5.14031	H__sapiens__1_-708731	query	ANXA3	2.22727	NM_005139	NP_005130	0.767834	FALSE	H__sapiens__1_-708731	6196	ANX3	P12429
254	cellular metal ion homeostasis|lysosomal membrane|divalent inorganic cation transmembrane transporter activity|active transmembrane transporter activity|response to oxygen levels|response to hypoxia|regulation of cysteine-type endopeptidase activity involved in apoptotic process|response to oxidative stress|transition metal ion homeostasis|iron ion homeostasis|perinuclear region of cytoplasm|cell…	GO:0006875|GO:0005765|GO:0072509|GO:0022804|GO:0070482|GO:0001666|GO:0043281|GO:0006979|GO:0055076|GO:0055072|GO:0048471|GO:0006879|GO:0036293|GO:0010035|GO:0046873|GO:0052547|GO:0016324|GO:0055065|GO:0000041|GO:0045177|GO:0006826|GO:0034599|GO:0044437|GO:0006873|GO:0098590|GO:0046916|GO:2000116|GO:0070838|GO:0072511|GO:0022890|GO:0048871|GO:0005774|GO:0052548|GO:0030003|GO:0005769	81.8536	4.31163	-111	0.0015949	39	0.333333	0.0292102	ENSG00000110911	ENSP00000450389	4891	SLC11A2	-0.233685		Unclustered	3.54462	H__sapiens__1_-704806	query	SLC11A2	2.1	NM_001174130	NP_001167601	0.791611	FALSE	H__sapiens__1_-704806	1300	NRAMP2	P49281
256	hexose metabolic process|glucose metabolic process|peptide metabolic process|respiratory electron transport chain|regulation of neurotransmitter levels|cellular amide metabolic process|monosaccharide metabolic process|organic acid catabolic process|cellular amino acid catabolic process|neurotransmitter metabolic process|carboxylic acid catabolic process|electron transport chain|oxidoreductase act…	GO:0019318|GO:0006006|GO:0006518|GO:0022904|GO:0001505|GO:0043603|GO:0005996|GO:0016054|GO:0009063|GO:0042133|GO:0046395|GO:0022900|GO:0016903|GO:0009064|GO:0006836|GO:0005759|GO:0043648|GO:0045333|GO:0006536|GO:1901605|GO:0023061|GO:0044282|GO:0006575|GO:0007269|GO:0015980|GO:0006749	198.645	4.5914	-98	0.00162866	53	0.333333	0.0344522	ENSG00000112294	ENSP00000417687	7915	ALDH5A1	-0.265415	Cluster 8	Clustered	3.86932	H__sapiens__1_-705019	query	ALDH5A1	2.13939	NM_170740	NP_733936	0.766887	FALSE	H__sapiens__1_-705019	2528	SSDH	P51649
257	divalent inorganic cation transmembrane transporter activity|peptide hormone secretion|response to hypoxia|regulation of phospholipase C activity|positive regulation of lipase activity|response to decreased oxygen levels|metal ion transmembrane transporter activity|energy reserve metabolic process|fibroblast growth factor receptor signaling pathway|Fc-gamma receptor signaling pathway|regulation o…	GO:0072509|GO:0030072|GO:0001666|GO:1900274|GO:0060193|GO:0036293|GO:0046873|GO:0006112|GO:0008543|GO:0038094|GO:0090087|GO:0030168|GO:0023061|GO:0038179|GO:0038127|GO:0048011|GO:0090276|GO:0002429|GO:0002433|GO:0070482|GO:0050796|GO:0015085|GO:0010817|GO:0002790|GO:0015833|GO:0044344|GO:0046883|GO:0007173|GO:0038095|GO:0046879|GO:0010863|GO:0071774|GO:0030073|GO:0031094|GO:0010517|GO:0002768|GO:…	232.365	4.68569	-101	0.00162075	53	0.333333	0.031578	ENSG00000123104	ENSP00000440548	3709	ITPR2	-0.218993	Cluster 8	Clustered	3.91444	H__sapiens__1_-706326	query	ITPR2	2.1303	NM_002223	NP_002214	0.803327	FALSE	H__sapiens__1_-706326	3244	IP3R2	Q14571
262	cellular metal ion homeostasis|regulation of sequestering of calcium ion|regulation of calcium ion transmembrane transporter activity|regulation of cation channel activity|regulation of ion transmembrane transport|muscle system process|transferase activity, transferring alkyl or aryl (other than methyl) groups|calcium ion homeostasis|regulation of ion transmembrane transporter activity|divalent i…	GO:0006875|GO:0051282|GO:1901019|GO:2001257|GO:0034765|GO:0003012|GO:0016765|GO:0055074|GO:0032412|GO:0072507|GO:0010522|GO:0055065|GO:0004364|GO:0010959|GO:0005996|GO:0051209|GO:0032409|GO:0071466|GO:0016209|GO:0072511|GO:0006805|GO:0003015|GO:0090257|GO:0051480|GO:0044057|GO:0034762|GO:0072503|GO:1901020|GO:0009410|GO:0060401|GO:0032411|GO:0030003|GO:2000021|GO:2001258|GO:0051924|GO:0060402|GO:…	182.605	3.54619	-96	0.00163399	61	0.333333	0.0405395	ENSG00000148834	ENSP00000441488	9446	GSTO1	-0.266871	Cluster 6	Clustered	6.66667	H__sapiens__1_-710135	query	GSTO1	2.14545	NM_004832	NP_004823	0.765772	FALSE	H__sapiens__1_-710135	2578	GSTTLp28	P78417
264	regulation of histone modification|striated muscle tissue development|muscle cell differentiation|cardiac muscle tissue development|regulation of cell adhesion|peptidyl-serine modification|epithelial cell proliferation|positive regulation of peptidyl-tyrosine phosphorylation|receptor activator activity|blood circulation|growth factor receptor binding|histone deacetylation|striated muscle cell dif…	GO:0031056|GO:0014706|GO:0042692|GO:0048738|GO:0030155|GO:0018209|GO:0050673|GO:0050731|GO:0030546|GO:0008015|GO:0070851|GO:0016575|GO:0051146|GO:0048589|GO:0043406|GO:0001935|GO:2000147|GO:0031623|GO:0030100|GO:0018105|GO:0043410|GO:0002573|GO:0048871|GO:0050767|GO:0030141|GO:0030168|GO:0051091|GO:0001936|GO:0048259|GO:0002687|GO:0002092|GO:0030947|GO:0030545|GO:0030855|GO:0043112|GO:0043281|GO:…	391.014	3.83204	-62	0.0017301	91	0.5	0.0652995	ENSG00000112715	ENSP00000484284	7422	VEGFA	-0.267225	Cluster 6	Clustered	7.14724	H__sapiens__1_-705084	query	VEGFA	2.24848	NM_003376	NP_003367	0.765501	FALSE	H__sapiens__1_-705084	6440	VPF	P15692
265			256.814	4.18048	-87	0.00165837	65	0.333333	0.0413087	ENSG00000282830	ENSP00000489458	794	CALB2	-0.218863	Cluster 7	Clustered	5.16923	H__sapiens__1_-714228	query	CALB2	2.17273	NM_007088	NP_009019	0.803432	FALSE	H__sapiens__1_-714228	4046	CAL2	P22676
267	response to virus	GO:0009615	114.94	3.87439	-104	0.0016129	49	0.333333	0.0343012	ENSG00000117632	ENSP00000410452	3925	STMN1	-0.267339		Unclustered	3.67563	H__sapiens__1_-705729	query	STMN1	2.12121	NM_203401	NP_981946	0.765413	FALSE	H__sapiens__1_-705729	2050	PR22	P16949
268	cellular metal ion homeostasis|divalent inorganic cation transmembrane transporter activity|gated channel activity|neuronal cell body|peptide hormone secretion|substrate-specific channel activity|cell body|regulation of phospholipase C activity|ligand-gated ion channel activity|positive regulation of lipase activity|calcium ion homeostasis|divalent inorganic cation homeostasis|response to inorgan…	GO:0006875|GO:0072509|GO:0022836|GO:0043025|GO:0030072|GO:0022838|GO:0044297|GO:1900274|GO:0015276|GO:0060193|GO:0055074|GO:0072507|GO:0010035|GO:0046873|GO:0055065|GO:0006112|GO:0008543|GO:0038094|GO:0005216|GO:0090087|GO:0072511|GO:0022834|GO:0051480|GO:0030168|GO:0072503|GO:0023061|GO:0038179|GO:0060401|GO:0030003|GO:0038127|GO:0048011|GO:0090276|GO:0002429|GO:0015267|GO:0002433|GO:0050796|GO:…	107.152	3.3557	-115	0.00158479	46	0.333333	0.0266327	ENSG00000096433	ENSP00000475177	3710	ITPR3	-0.230263		Unclustered	3.61846	H__sapiens__1_-703042	query	ITPR3	2.08788	NM_002224	NP_002215	0.794325	FALSE	H__sapiens__1_-703042	1598	IP3R3	Q14573
270	signal release|neurotransmitter metabolic process|cellular response to xenobiotic stimulus|behavior|regulation of neurotransmitter levels|xenobiotic metabolic process|response to xenobiotic stimulus|neurotransmitter secretion|neurotransmitter transport|oxidoreductase activity, acting on the CH-NH2 group of donors|neurotransmitter biosynthetic process|mitochondrial membrane	GO:0023061|GO:0042133|GO:0071466|GO:0007610|GO:0001505|GO:0006805|GO:0009410|GO:0007269|GO:0006836|GO:0016638|GO:0042136|GO:0031966	125.448	3.16754	-102	0.00161812	54	0.333333	0.0345518	ENSG00000189221	ENSP00000440846	4128	MAOA	-0.267496		Unclustered	3.33659	H__sapiens__1_-717935	query	MAOA	2.12727	NM_001270458	NP_001257387	0.765293	FALSE	H__sapiens__1_-717935	1910		P21397
272	epithelial cell differentiation|monosaccharide biosynthetic process|hexose metabolic process|glucose metabolic process|glucose catabolic process|carbohydrate catabolic process|hexose catabolic process|glycolysis|monosaccharide catabolic process|single-organism carbohydrate catabolic process|gluconeogenesis|carbohydrate biosynthetic process|monosaccharide metabolic process|hexose biosynthetic proc…	GO:0030855|GO:0046364|GO:0019318|GO:0006006|GO:0006007|GO:0016052|GO:0019320|GO:0006096|GO:0046365|GO:0044724|GO:0006094|GO:0016051|GO:0005996|GO:0019319	176.818	1.41199	-75	0.00169205	112	0.333333	0.0645177	ENSG00000102144	ENSP00000362413	5230	PGK1	-0.267664	Cluster 2	Clustered	14.7517	H__sapiens__1_-703614	query	PGK1	2.20909	NM_000291	NP_000282	0.765165	FALSE	H__sapiens__1_-703614	3434		P00558
275	regulation of vesicle-mediated transport|receptor internalization|guanyl ribonucleotide binding|regulation of exocytosis|receptor-mediated endocytosis|receptor metabolic process|positive regulation of secretion|guanyl nucleotide binding|exocytosis|GTPase activity|early endosome|GTP binding	GO:0060627|GO:0031623|GO:0032561|GO:0017157|GO:0006898|GO:0043112|GO:0051047|GO:0019001|GO:0006887|GO:0003924|GO:0005769|GO:0005525	123.173	2.80441	-98	0.00162602	56	0.333333	0.035128	ENSG00000144566	ENSP00000411941	5868	RAB5A	-0.26793	Cluster 6	Clustered	6.66667	H__sapiens__1_-709575	query	RAB5A	2.13636	NM_004162	NP_004153	0.764961	FALSE	H__sapiens__1_-709575	1952	RAB5	P20339
279	immune response-activating cell surface receptor signaling pathway|protein kinase binding|cellular response to peptide|immune response-regulating cell surface receptor signaling pathway|response to peptide|cellular response to peptide hormone stimulus|cellular response to insulin stimulus|histone phosphorylation|response to peptide hormone|histone modification|platelet activation|positive regulat…	GO:0002429|GO:0019901|GO:1901653|GO:0002768|GO:1901652|GO:0071375|GO:0032869|GO:0016572|GO:0043434|GO:0016570|GO:0030168|GO:0051091|GO:0030949|GO:0043122|GO:0048010|GO:0030947|GO:0016569|GO:0045766|GO:0001525|GO:0032868|GO:0008286|GO:0050681|GO:0090287|GO:0051051	312.158	2.71107	-73	0.00169779	95	0.5	0.0526648	ENSG00000166501	ENSP00000459227	5579	PRKCB	-0.268028	Cluster 6	Clustered	5.84512	H__sapiens__1_-712871	query	PRKCB	2.21515	NM_212535	NP_997700	0.764887	FALSE	H__sapiens__1_-712871	4704	PRKCB2	P05771
280	primary active transmembrane transporter activity|ATPase activity|active transmembrane transporter activity|response to drug|ATPase activity, coupled to transmembrane movement of substances|P-P-bond-hydrolysis-driven transmembrane transporter activity|G2/M transition of mitotic cell cycle|cell cycle G2/M phase transition|ATPase activity, coupled to movement of substances|apical plasma membrane|hy…	GO:0015399|GO:0016887|GO:0022804|GO:0042493|GO:0042626|GO:0015405|GO:0000086|GO:0044839|GO:0043492|GO:0016324|GO:0016820|GO:0045177|GO:0098590	165.288	3.93576	-95	0.00163666	56	0.333333	0.0374462	ENSG00000085563	ENSP00000478255	5243	ABCB1	-0.251008	Cluster 8	Clustered	4.18846	H__sapiens__1_-702639	query	ABCB1	2.14848	NM_000927	NP_000918	0.778016	FALSE	H__sapiens__1_-702639	2542	PGY1	P08183
282	chaperone binding|primary active transmembrane transporter activity|ATPase activity|active transmembrane transporter activity|ATPase activity, coupled to transmembrane movement of ions|inorganic cation transmembrane transporter activity|regulation of sodium ion transport|ATPase activity, coupled to transmembrane movement of substances|monovalent inorganic cation transport|P-P-bond-hydrolysis-driv…	GO:0051087|GO:0015399|GO:0016887|GO:0022804|GO:0042625|GO:0022890|GO:0002028|GO:0042626|GO:0015672|GO:0015405|GO:0019829|GO:0043269|GO:0043492|GO:0046873|GO:0016820|GO:0010959	339.185	3.0419	-64	0.00172414	96	0.5	0.0662352	ENSG00000163399	ENSP00000445306	476	ATP1A1	-0.272291	Cluster 5	Clustered	8.27102	H__sapiens__1_-711993	query	ATP1A1	2.24242	NM_001160234	NP_001153706	0.761633	FALSE	H__sapiens__1_-711993	5826		P05023
284	cellular response to peptide|response to peptide|cellular response to peptide hormone stimulus|cytokine receptor binding|regulation of growth|multicellular organism growth|JAK-STAT cascade|response to peptide hormone|regulation of multicellular organism growth|regulation of JAK-STAT cascade	GO:1901653|GO:1901652|GO:0071375|GO:0005126|GO:0040008|GO:0035264|GO:0007259|GO:0043434|GO:0040014|GO:0046425	644.8	4.53277	-59	0.00173913	94	0.333333	0.0593404	ENSG00000172179	ENSP00000480195	5617	PRL	-0.274955	Cluster 8	Clustered	4.58551	H__sapiens__1_-714242	query	PRL	2.25758	NM_001163558	NP_001157030	0.759606	FALSE	H__sapiens__1_-714242	9384		P01236
287	cellular response to xenobiotic stimulus|alcohol metabolic process|xenobiotic metabolic process|response to xenobiotic stimulus|regulation of hormone levels	GO:0071466|GO:0006066|GO:0006805|GO:0009410|GO:0010817	309.437	3.68622	-73	0.00169779	79	0.333333	0.05405	ENSG00000137869	ENSP00000479587	1588	CYP19A1	-0.205152	Cluster 8	Clustered	4.37916	H__sapiens__1_-708553	query	CYP19A1	2.21515	NM_031226	NP_112503	0.814524	FALSE	H__sapiens__1_-708553	4798	P-450AROM	P11511
289	regulation of peptide hormone secretion|carboxylic acid transport|regulation of insulin secretion|peptide hormone secretion|regulation of hormone levels|synaptic vesicle localization|peptide secretion|establishment of vesicle localization|exocytosis|vesicle localization|synaptic vesicle transport|acid secretion|peptide transport|neuron projection|neuron part|regulation of hormone secretion|regula…	GO:0090276|GO:0046942|GO:0050796|GO:0030072|GO:0010817|GO:0097479|GO:0002790|GO:0051650|GO:0006887|GO:0051648|GO:0048489|GO:0046717|GO:0015833|GO:0043005|GO:0097458|GO:0046883|GO:0001505|GO:0014047|GO:0046879|GO:0006112|GO:0030073|GO:0090087|GO:0051656|GO:0009914|GO:0001504|GO:0015849|GO:0097480|GO:0006836|GO:0042886|GO:0023061|GO:0016079|GO:0007269|GO:0015980|GO:0002791|GO:0051640	666.184	2.27644	-38	0.00180505	153	0.5	0.0821033	ENSG00000132639	ENSP00000400720	6616	SNAP25	-0.275042	Cluster 4	Clustered	13.6189	H__sapiens__1_-707613	query	SNAP25	2.32121	NM_130811	NP_570824	0.75954	FALSE	H__sapiens__1_-707613	11310	SNAP-25	P60880
291	toll-like receptor signaling pathway|positive regulation of defense response|response to virus|toll-like receptor 9 signaling pathway|regulatory region nucleic acid binding|activation of innate immune response|MyD88-independent toll-like receptor signaling pathway|cell-type specific apoptotic process|regulation of myeloid cell apoptotic process|intracellular receptor signaling pathway|pattern rec…	GO:0002224|GO:0031349|GO:0009615|GO:0034162|GO:0001067|GO:0002218|GO:0002756|GO:0097285|GO:0033032|GO:0030522|GO:0002221|GO:0044212|GO:0002521|GO:0035666|GO:0001819|GO:0033028|GO:0045089|GO:0002761|GO:0034142|GO:0071887|GO:0071346|GO:0002755|GO:0002573|GO:0034341|GO:0034138|GO:0045088|GO:0000975|GO:0002758|GO:0001047	84.9931	5.28753	-127	0.00154799	27	0.333333	0.0155813	ENSG00000276561	ENSP00000488666	3665	IRF7	-0.275885		Unclustered	3.2967	H__sapiens__1_-717013	query	IRF7	2.04242	NM_004031	NP_004022	0.7589	FALSE	H__sapiens__1_-717013	1140		Q92985
292	negative regulation of multicellular organismal process	GO:0051241	46.0958	5.25828	-146	0.00148588	19	0.333333	0.0103424	ENSG00000156587	ENSP00000435265	9246	UBE2L6	-0.255057	Cluster 8	Clustered	4	H__sapiens__1_-711001	query	UBE2L6	1.96061	NM_198183	NP_937826	0.774873	FALSE	H__sapiens__1_-711001	574		O14933
294	lysosomal membrane|response to glucagon|cellular response to peptide|response to peptide|cellular response to peptide hormone stimulus|response to peptide hormone|GTPase activity|perinuclear region of cytoplasm|cellular response to glucagon stimulus|vacuolar membrane|energy reserve metabolic process|energy derivation by oxidation of organic compounds|vacuolar part	GO:0005765|GO:0033762|GO:1901653|GO:1901652|GO:0071375|GO:0043434|GO:0003924|GO:0048471|GO:0071377|GO:0005774|GO:0006112|GO:0015980|GO:0044437	616.728	3.29501	-44	0.00178571	125	0.5	0.0795508	ENSG00000172354	ENSP00000413219	2783	GNB2	-0.276939	Cluster 3	Clustered	9.64492	H__sapiens__1_-714291	query	GNB2	2.30303	NM_005273	NP_005264	0.758101	FALSE	H__sapiens__1_-714291	9316		P62879
296	nucleoside triphosphate biosynthetic process|proton-transporting ATP synthase complex|ribonucleoside triphosphate biosynthetic process|purine nucleoside triphosphate biosynthetic process|mitochondrial ATP synthesis coupled proton transport|ribose phosphate biosynthetic process|respiratory electron transport chain|purine nucleoside biosynthetic process|organelle inner membrane|ATP biosynthetic pro…	GO:0009142|GO:0045259|GO:0009201|GO:0009145|GO:0042776|GO:0046390|GO:0022904|GO:0042451|GO:0019866|GO:0006754|GO:0009161|GO:0015985|GO:0009127|GO:0009126|GO:0044455|GO:0015986|GO:0009206|GO:0005743|GO:0046129|GO:0046034|GO:0009152|GO:0022900|GO:0006164|GO:0009156|GO:0009167|GO:1901293|GO:0009165|GO:0006839|GO:0072522|GO:0015992|GO:0006818|GO:0045333|GO:0009124|GO:0015672|GO:0042455|GO:0016469|GO:…	128.799	2.11849	-86	0.00165837	75	0.333333	0.0553116	ENSG00000159199	ENSP00000458423	516	ATP5G1	-0.277044	Cluster 2	Clustered	16.7758	H__sapiens__1_-711308	query	ATP5G1	2.17273	NM_005175	NP_005166	0.758021	FALSE	H__sapiens__1_-711308	2552	ATP5G	P05496
298	pyruvate metabolic process	GO:0006090	473.666	2.34107	-46	0.00177936	133	0.5	0.0816023	ENSG00000111716	ENSP00000442680	3945	LDHB	-0.277899	Cluster 1	Clustered	18.4379	H__sapiens__1_-704919	query	LDHB	2.29697	NM_002300	NP_002291	0.757374	FALSE	H__sapiens__1_-704919	8062		P07195
299	cellular metal ion homeostasis|ferric iron transport|transferrin transport|secretory granule lumen|transition metal ion homeostasis|exocytosis|iron ion homeostasis|perinuclear region of cytoplasm|cellular iron ion homeostasis|vesicle lumen|platelet degranulation|endocytic vesicle|cytoplasmic membrane-bounded vesicle lumen|apical plasma membrane|metal ion homeostasis|transition metal ion transport…	GO:0006875|GO:0015682|GO:0033572|GO:0034774|GO:0055076|GO:0006887|GO:0055072|GO:0048471|GO:0006879|GO:0031983|GO:0002576|GO:0030139|GO:0060205|GO:0016324|GO:0055065|GO:0000041|GO:0045177|GO:0072512|GO:0006826|GO:0006873|GO:0098590|GO:0046916|GO:0048871|GO:0030141|GO:0030168|GO:0005905|GO:0030003|GO:0005769|GO:0072562	217.332	3.94565	-89	0.00165289	62	0.333333	0.0407104	ENSG00000091513	ENSP00000419714	7018	TF	-0.201061	Cluster 7	Clustered	4.87903	H__sapiens__1_-702906	query	TF	2.16667	NM_001063	NP_001054	0.817863	FALSE	H__sapiens__1_-702906	3006	PRO2086	P02787
303	negative regulation of protein serine/threonine kinase activity|protein kinase regulator activity|peptide hormone secretion|kinase regulator activity|regulation of phospholipase C activity|positive regulation of lipase activity|negative regulation of kinase activity|energy reserve metabolic process|fibroblast growth factor receptor signaling pathway|negative regulation of transferase activity|neg…	GO:0071901|GO:0019887|GO:0030072|GO:0019207|GO:1900274|GO:0060193|GO:0033673|GO:0006112|GO:0008543|GO:0051348|GO:0010563|GO:0033762|GO:0090087|GO:1901653|GO:0032147|GO:0071375|GO:0023061|GO:0038179|GO:0001933|GO:0038127|GO:0048011|GO:0090276|GO:0004857|GO:0050796|GO:0042326|GO:0010817|GO:0002790|GO:0015833|GO:0044344|GO:0046883|GO:0007173|GO:0046879|GO:0010863|GO:0071774|GO:0030073|GO:0019901|GO:…	270.259	3.52256	-76	0.00168919	77	0.5	0.0566781	ENSG00000108946	ENSP00000468106	5573	PRKAR1A	-0.278266	Cluster 5	Clustered	7.71429	H__sapiens__1_-704589	query	PRKAR1A	2.20606	NM_212472	NP_997637	0.757095	FALSE	H__sapiens__1_-704589	4844	TSE1	P10644
307	establishment of organelle localization|interleukin-8 production|hormone transport|peptide hormone secretion|regulation of hormone levels|peptide secretion|establishment of vesicle localization|vesicle localization|GTPase activity|peptide transport|amide transport|signal release|cytoskeleton-dependent intracellular transport|Golgi vesicle transport|microtubule-based transport|microtubule-based mo…	GO:0051656|GO:0032637|GO:0009914|GO:0030072|GO:0010817|GO:0002790|GO:0051650|GO:0051648|GO:0003924|GO:0015833|GO:0042886|GO:0023061|GO:0030705|GO:0048193|GO:0010970|GO:0007018|GO:0046879|GO:0009306|GO:0051640	183.324	2.92236	-85	0.00166389	70	0.333333	0.0498853	ENSG00000138069	ENSP00000387286	5861	RAB1A	-0.249028	Cluster 6	Clustered	7.0359	H__sapiens__1_-708591	query	RAB1A	2.17879	NM_015543	NP_056358	0.779558	FALSE	H__sapiens__1_-708591	3110	YPT1	P62820
312	regulation of nervous system development|synapse organization|synapse assembly|positive regulation of cellular component biogenesis|regulation of synapse structure and activity|perinuclear region of cytoplasm	GO:0051960|GO:0050808|GO:0007416|GO:0044089|GO:0050803|GO:0048471	164.017	3.3113	-94	0.00163934	58	0.5	0.0367982	ENSG00000176697	ENSP00000437138	627	BDNF	-0.281466	Cluster 6	Clustered	6.77273	H__sapiens__1_-715133	query	BDNF	2.15152	NM_170735	NP_733931	0.754677	FALSE	H__sapiens__1_-715133	2754		P23560
315	nucleoid|mitochondrial transport|establishment of protein localization to mitochondrion|mitochondrial matrix|mitochondrion organization|mitochondrial nucleoid|unfolded protein binding	GO:0009295|GO:0006839|GO:0072655|GO:0005759|GO:0007005|GO:0042645|GO:0051082	564.91	2.59759	-46	0.00177936	133	0.5	0.080989	ENSG00000113013	ENSP00000429475	3313	HSPA9	-0.282136	Cluster 2	Clustered	17.6909	H__sapiens__1_-705116	query	HSPA9	2.29697	NM_004134	NP_004125	0.754171	FALSE	H__sapiens__1_-705116	8546	PBP74	P38646
319	negative regulation of extrinsic apoptotic signaling pathway|response to oxidative stress|regulation of neuron death|androgen receptor signaling pathway|response to hydrogen peroxide|regulation of inflammatory response|cell-type specific apoptotic process|cellular response to reactive oxygen species|intracellular receptor signaling pathway|negative regulation of neuron death|response to inorganic…	GO:2001237|GO:0006979|GO:1901214|GO:0030521|GO:0042542|GO:0050727|GO:0097285|GO:0034614|GO:0030522|GO:1901215|GO:0010035|GO:0034599|GO:0050681|GO:0016684|GO:0051402|GO:0031647|GO:0000302|GO:0016209|GO:0043524|GO:0051098|GO:0097191|GO:0007005|GO:2001234|GO:0006954|GO:0070301|GO:2001233|GO:0070997|GO:0004601|GO:0010469|GO:0043523|GO:2001236	137.269	2.85198	-96	0.00163132	64	0.333333	0.0508546	ENSG00000116288	ENSP00000466756	11315	PARK7	-0.282146	Cluster 2	Clustered	15.0202	H__sapiens__1_-705545	query	PARK7	2.14242	NM_007262	NP_009193	0.754163	FALSE	H__sapiens__1_-705545	2806	DJ1	Q99497
321	protein kinase binding	GO:0019901	227.042	3.00741	-84	0.00166667	78	0.333333	0.0515239	ENSG00000089220	ENSP00000261313	5037	PEBP1	-0.283244	Cluster 5	Clustered	7.92308	H__sapiens__1_-702805	query	PEBP	2.18182	NM_002567	NP_002558	0.753336	FALSE	H__sapiens__1_-702805	3776	RKIP	P30086
323	gated channel activity|glutamate receptor signaling pathway|ion channel activity|channel activity|ionotropic glutamate receptor activity|extracellular ligand-gated ion channel activity|ion channel complex|ligand-gated channel activity|passive transmembrane transporter activity|substrate-specific channel activity|cytoplasmic vesicle membrane|ionotropic glutamate receptor complex|ligand-gated ion c…	GO:0022836|GO:0007215|GO:0005216|GO:0015267|GO:0004970|GO:0005230|GO:0034702|GO:0022834|GO:0022803|GO:0022838|GO:0030659|GO:0008328|GO:0015276|GO:0030666|GO:0008066|GO:0035235|GO:1902495|GO:0030139|GO:0012506|GO:0043235|GO:0032281	470.281	2.28283	-56	0.00174825	128	0.5	0.0675137	ENSG00000120251	ENSP00000426845	2891	GRIA2	-0.283427	Cluster 3	Clustered	9.43269	H__sapiens__1_-706009	query	GRIA2	2.26667	NM_001083620	NP_001077089	0.753198	FALSE	H__sapiens__1_-706009	8444	GLURB	P42262
324			13.4699	1.47401	-131	0.00153846	29	0.333333	0.0191093	ENSG00000276734	ENSP00000480293	3800	KIF5C	-0.204935		Unclustered	5.92105	H__sapiens__1_-713319	query	KIF5C	2.0303	NM_004522	NP_004513	0.8147	FALSE	H__sapiens__1_-713319	276		O60282
327	forebrain development|cellular modified amino acid metabolic process|diencephalon development|substantia nigra development|subthalamus development|brain development|alpha-amino acid metabolic process	GO:0030900|GO:0006575|GO:0021536|GO:0021762|GO:0021539|GO:0007420|GO:1901605	310.739	4.9184	-84	0.00166667	65	0.333333	0.0489005	ENSG00000166165	ENSP00000451904	1152	CKB	-0.284222	Cluster 7	Clustered	5.66173	H__sapiens__1_-712774	query	CKB	2.18182	NM_001823	NP_001814	0.7526	FALSE	H__sapiens__1_-712774	4692	CKBB	P12277
329	electron transport chain|oxidoreductase complex|dicarboxylic acid metabolic process|respiratory chain|respiratory electron transport chain|cellular respiration|organelle inner membrane|tricarboxylic acid cycle|mitochondrial respiratory chain|mitochondrial membrane part|energy derivation by oxidation of organic compounds|mitochondrial membrane|mitochondrial inner membrane|aerobic respiration	GO:0022900|GO:1990204|GO:0043648|GO:0070469|GO:0022904|GO:0045333|GO:0019866|GO:0006099|GO:0005746|GO:0044455|GO:0015980|GO:0031966|GO:0005743|GO:0009060	148.848	1.83329	-84	0.00166667	86	0.333333	0.0538643	ENSG00000073578	ENSP00000484230	6389	SDHA	-0.285051	Cluster 2	Clustered	16.0711	H__sapiens__1_-702205	query	SDHA	2.18182	NM_004168	NP_004159	0.751976	FALSE	H__sapiens__1_-702205	2814	SDHF	P31040
333	response to lipid|hexose metabolic process|glucose metabolic process|cellular response to insulin stimulus|alpha-amino acid catabolic process|response to steroid hormone|response to corticosteroid|alpha-amino acid biosynthetic process|gluconeogenesis|cellular carbohydrate metabolic process|carbohydrate biosynthetic process|organic hydroxy compound biosynthetic process|monosaccharide metabolic pro…	GO:0033993|GO:0019318|GO:0006006|GO:0032869|GO:1901606|GO:0048545|GO:0031960|GO:1901607|GO:0006094|GO:0044262|GO:0016051|GO:1901617|GO:0005996|GO:0016054|GO:0019319|GO:0009063|GO:0046364|GO:0046395|GO:0016769|GO:1901653|GO:0014070|GO:0009068|GO:1901652|GO:0071375|GO:0043649|GO:0009064|GO:0043648|GO:0043434|GO:0006536|GO:1901605|GO:0006066|GO:0008652|GO:0046165|GO:0044282|GO:0032868|GO:0051384	252.187	2.13703	-71	0.00170358	102	0.333333	0.0642095	ENSG00000120053	ENSP00000359539	2805	GOT1	-0.271321	Cluster 2	Clustered	16.5564	H__sapiens__1_-705984	query	GOT1	2.22121	NM_002079	NP_002070	0.762372	FALSE	H__sapiens__1_-705984	4462	AST1	P17174
335	monosaccharide biosynthetic process|hexose metabolic process|glucose metabolic process|glucose catabolic process|carbohydrate catabolic process|polysaccharide biosynthetic process|hexose catabolic process|isomerase activity|glycolysis|monosaccharide catabolic process|polysaccharide metabolic process|single-organism carbohydrate catabolic process|gluconeogenesis|cellular carbohydrate catabolic pro…	GO:0046364|GO:0019318|GO:0006006|GO:0006007|GO:0016052|GO:0000271|GO:0019320|GO:0016853|GO:0006096|GO:0046365|GO:0005976|GO:0044724|GO:0006094|GO:0044275|GO:0044262|GO:0016051|GO:0006112|GO:0015980|GO:0005996|GO:0019319	214.785	2.37977	-75	0.00168919	88	0.333333	0.0565937	ENSG00000079739	ENSP00000443449	5236	PGM1	-0.285088	Cluster 5	Clustered	8.84553	H__sapiens__1_-702450	query	PGM1	2.20606	NM_002633	NP_002624	0.751948	FALSE	H__sapiens__1_-702450	3804		P36871
341	gated channel activity|ion channel activity|channel activity|nucleoid|passive transmembrane transporter activity|substrate-specific channel activity|mitochondrial matrix|mitochondrial nucleoid	GO:0022836|GO:0005216|GO:0015267|GO:0009295|GO:0022803|GO:0022838|GO:0005759|GO:0042645	332.72	2.21748	-52	0.00176056	119	0.333333	0.0834465	ENSG00000165637	ENSP00000443092	7417	VDAC2	-0.285266	Cluster 2	Clustered	18.062	H__sapiens__1_-712642	query	VDAC2	2.27879	NM_003375	NP_003366	0.751814	FALSE	H__sapiens__1_-712642	6680		P45880
343	immune response-activating cell surface receptor signaling pathway|immune response-regulating cell surface receptor signaling pathway involved in phagocytosis|immune response-regulating cell surface receptor signaling pathway|Fc-gamma receptor signaling pathway involved in phagocytosis|phagocytosis|Fc-gamma receptor signaling pathway|Fc receptor mediated stimulatory signaling pathway|Fc receptor …	GO:0002429|GO:0002433|GO:0002768|GO:0038096|GO:0006909|GO:0038094|GO:0002431|GO:0038093	188.334	2.42485	-79	0.00168067	83	0.333333	0.0559005	ENSG00000138071	ENSP00000490923	10097	ACTR2	-0.282623	Cluster 4	Clustered	12.4026	H__sapiens__1_-708592	query	ACTR2	2.19697	NM_005722	NP_005713	0.753804	FALSE	H__sapiens__1_-708592	3432		P61160
345			228.057	3.14642	-89	0.00165289	71	0.333333	0.0410551	ENSG00000072832	ENSP00000425742	1400	CRMP1	-0.285881	Cluster 5	Clustered	7.91111	H__sapiens__1_-702183	query	DPYSL1	2.16667	NM_001313	NP_001304	0.751352	FALSE	H__sapiens__1_-702183	3428	DPYSL1	Q14194
348	glutamate receptor signaling pathway|behavior|cognition|ionotropic glutamate receptor signaling pathway|single-organism behavior|response to alcohol|ion channel complex|transmembrane transporter complex|learning or memory|response to ethanol|ionotropic glutamate receptor complex|receptor complex	GO:0007215|GO:0007610|GO:0050890|GO:0035235|GO:0044708|GO:0097305|GO:0034702|GO:1902495|GO:0007611|GO:0045471|GO:0008328|GO:0043235	781.265	2.43882	-37	0.00180832	155	0.5	0.0768724	ENSG00000183454	ENSP00000490676	2903	GRIN2A	-0.288093	Cluster 4	Clustered	11.6318	H__sapiens__1_-716498	query	GRIN2A	2.32424	NM_001134408	NP_001127880	0.749692	FALSE	H__sapiens__1_-716498	12532	NMDAR2A	Q12879
349	cellular metal ion homeostasis|gated channel activity|regulation of purine nucleotide biosynthetic process|negative regulation of protein transport|negative regulation of cAMP metabolic process|substrate-specific channel activity|regulation of adenylate cyclase activity|nitric oxide biosynthetic process|nitric oxide metabolic process|regulation of ion transmembrane transport|negative regulation o…	GO:0006875|GO:0022836|GO:1900371|GO:0051224|GO:0030815|GO:0022838|GO:0045761|GO:0006809|GO:0046209|GO:0034765|GO:0050709|GO:0032412|GO:0072507|GO:0045471|GO:0055065|GO:0030594|GO:0009306|GO:0032409|GO:0007215|GO:0005216|GO:0030803|GO:0030808|GO:0051480|GO:0043410|GO:0050767|GO:0034762|GO:0072503|GO:0097305|GO:0030814|GO:0030003|GO:1900372|GO:0009187|GO:0070372|GO:0015085|GO:0006816|GO:0046390|GO:…	181.463	3.2022	-90	0.00165017	66	0.5	0.0396586	ENSG00000112038	ENSP00000431048	4988	OPRM1	-0.113942	Cluster 1	Clustered	22	H__sapiens__1_-704971	query	OPRM1	2.16364	NM_001285526	NP_001272455	0.89231	FALSE	H__sapiens__1_-704971	2798	MOR1	P35372
352	cellular metal ion homeostasis|regulation of purine nucleotide biosynthetic process|negative regulation of protein transport|visual learning|negative regulation of cAMP metabolic process|drug binding|regulation of adenylate cyclase activity|icosanoid transport|long-chain fatty acid transport|regulation of neurotransmitter levels|negative regulation of protein secretion|divalent inorganic cation h…	GO:0006875|GO:1900371|GO:0051224|GO:0008542|GO:0030815|GO:0008144|GO:0045761|GO:0071715|GO:0015909|GO:0001505|GO:0050709|GO:0072507|GO:0008015|GO:0032922|GO:0055065|GO:0030594|GO:0009306|GO:0051302|GO:0009712|GO:0090068|GO:0031623|GO:0006869|GO:1901571|GO:0007611|GO:0015849|GO:0030803|GO:0045744|GO:0030808|GO:0015850|GO:0050767|GO:0043491|GO:0072503|GO:0018958|GO:0015872|GO:0030814|GO:0030003|GO:…	156.844	3.21982	-91	0.00164745	63	0.333333	0.0409716	ENSG00000151577	ENSP00000420662	1814	DRD3	-0.179276	Cluster 1	Clustered	22.7877	H__sapiens__1_-710421	query	DRD3	2.16061	NM_033663	NP_387512	0.835875	FALSE	H__sapiens__1_-710421	2520		P35462
354	neuron part|intracellular receptor signaling pathway|androgen receptor signaling pathway|androgen receptor binding|neuron projection	GO:0097458|GO:0030522|GO:0030521|GO:0050681|GO:0043005	28.2582	2.58183	-139	0.00152672	29	0.333333	0.0177788	ENSG00000155974	ENSP00000446067	23426	GRIP1	-0.187926	Cluster 6	Clustered	6.97436	H__sapiens__1_-710922	query	GRIP1	2.01515	NM_021150	NP_066973	0.828676	FALSE	H__sapiens__1_-710922	460		Q9Y3R0
356	neuron part|synapse organization|dendritic spine|neuron spine|synapse assembly|GTPase activity|postsynaptic density|dendrite|synapse part|synapse|neuron projection|perinuclear region of cytoplasm	GO:0097458|GO:0050808|GO:0043197|GO:0044309|GO:0007416|GO:0003924|GO:0014069|GO:0030425|GO:0044456|GO:0045202|GO:0043005|GO:0048471	223.075	3.71703	-80	0.00167785	70	0.333333	0.051033	ENSG00000197959	ENSP00000486701	26052	DNM3	-0.188373	Cluster 5	Clustered	8.15556	H__sapiens__1_-718616	query	DNM3	2.19394	NM_015569	NP_056384	0.828306	FALSE	H__sapiens__1_-718616	3708	KIAA0820	Q9UQ16
360	G-protein coupled receptor signaling pathway, coupled to cyclic nucleotide second messenger|extrinsic component of plasma membrane|dopamine receptor signaling pathway|adenylate cyclase-modulating G-protein coupled receptor signaling pathway|G-protein beta/gamma-subunit complex binding|extrinsic component of cytoplasmic side of plasma membrane|extrinsic component of membrane|heterotrimeric G-prote…	GO:0007187|GO:0019897|GO:0007212|GO:0007188|GO:0031683|GO:0031234|GO:0019898|GO:0005834|GO:0003924|GO:0003012|GO:0001664	512.94	2.50856	-46	0.00177936	130	0.5	0.073132	ENSG00000087258	ENSP00000477740	2775	GNAO1	-0.222294	Cluster 4	Clustered	12.5521	H__sapiens__1_-702710	query	GNAO1	2.29697	NM_138736	NP_620073	0.80068	FALSE	H__sapiens__1_-702710	8172	G-ALPHA-o	P09471
363	regulation of cysteine-type endopeptidase activity|regulation of phospholipase activity|activation of protein kinase activity|regulation of hormone levels|extrinsic apoptotic signaling pathway|cytokine receptor binding|regulation of cysteine-type endopeptidase activity involved in apoptotic process|regulation of lipase activity|regulation of phospholipase C activity|regulation of neuron projectio…	GO:2000116|GO:0010517|GO:0032147|GO:0010817|GO:0097191|GO:0005126|GO:0043281|GO:0060191|GO:1900274|GO:0010975|GO:0048015|GO:0050767|GO:0010518|GO:0051960|GO:0007202|GO:0038179|GO:0052548|GO:0060193|GO:0007265|GO:0052547|GO:0010863|GO:0048011|GO:0048017	168.789	3.25655	-92	0.00164474	63	0.333333	0.0461508	ENSG00000134259	ENSP00000358525	4803	NGF	-0.24825	Cluster 6	Clustered	6.88049	H__sapiens__1_-707855	query	NGF	2.15758	NM_002506	NP_002497	0.780165	FALSE	H__sapiens__1_-707855	3378	NGFB	P01138
367	cellular metal ion homeostasis|regulation of purine nucleotide biosynthetic process|visual learning|regulation of adenylate cyclase activity|regulation of neurotransmitter levels|response to catecholamine|divalent inorganic cation homeostasis|regulation of calcium ion transport into cytosol|metal ion homeostasis|neurotransmitter receptor activity|regulation of metal ion transport|catechol-contain…	GO:0006875|GO:1900371|GO:0008542|GO:0045761|GO:0001505|GO:0071869|GO:0072507|GO:0010522|GO:0055065|GO:0030594|GO:0010959|GO:0009712|GO:2000147|GO:0007611|GO:0030808|GO:0071868|GO:0051480|GO:0015850|GO:0072503|GO:0050808|GO:0018958|GO:0015872|GO:0030814|GO:0030003|GO:0009187|GO:0060402|GO:0006816|GO:0046390|GO:0008306|GO:0004930|GO:0050804|GO:0009314|GO:0051952|GO:0050890|GO:0009152|GO:0070838|GO:…	374.732	3.42874	-70	0.00170648	90	0.333333	0.0529697	ENSG00000184845	ENSP00000377353	1812	DRD1	-0.255692	Cluster 1	Seed	23	H__sapiens__1_-716840	query	DRD1	2.22424	NM_000794	NP_000785	0.77438	FALSE	H__sapiens__1_-716840	5824		P21728
370	response to lipid|regulation of purine nucleotide biosynthetic process|negative regulation of cAMP metabolic process|regulation of cell adhesion|regulation of phospholipase C activity|regulation of adenylate cyclase activity|epithelial cell proliferation|muscle system process|perinuclear region of cytoplasm|cellular response to light stimulus|fibroblast growth factor receptor signaling pathway|en…	GO:0033993|GO:1900371|GO:0030815|GO:0030155|GO:1900274|GO:0045761|GO:0050673|GO:0003012|GO:0048471|GO:0071482|GO:0008543|GO:0001935|GO:0002761|GO:2000147|GO:0030803|GO:0030808|GO:0044057|GO:0043410|GO:0002573|GO:0030168|GO:0002237|GO:0001936|GO:0030814|GO:1900372|GO:0009187|GO:0090276|GO:0070372|GO:0010817|GO:0046390|GO:0002790|GO:0015833|GO:0044344|GO:0046883|GO:0097285|GO:0070371|GO:0001525|GO:…	424.594	2.58202	-58	0.00174216	118	0.5	0.0661795	ENSG00000154229	ENSP00000462087	5578	PRKCA	-0.262335	Cluster 5	Clustered	7.46851	H__sapiens__1_-710737	query	PRKCA	2.26061	NM_002737	NP_002728	0.769254	FALSE	H__sapiens__1_-710737	6716	PKCA	P17252
372	glutamate receptor signaling pathway|behavior|cognition|carboxylic acid binding|single-organism behavior|ion channel complex|learning or memory|ionotropic glutamate receptor complex|amino acid binding|neuron projection|neuron part|ionotropic glutamate receptor signaling pathway|organic acid binding|response to alcohol|transmembrane transporter complex|response to ethanol|receptor complex	GO:0007215|GO:0007610|GO:0050890|GO:0031406|GO:0044708|GO:0034702|GO:0007611|GO:0008328|GO:0016597|GO:0043005|GO:0097458|GO:0035235|GO:0043177|GO:0097305|GO:1902495|GO:0045471|GO:0043235	687.731	2.33955	-36	0.00181159	156	0.5	0.0853073	ENSG00000273079	ENSP00000489997	2904	GRIN2B	-0.273426	Cluster 5	Clustered	9.1	H__sapiens__1_-755821	query	GRIN2B	2.32727	NM_000834	NP_000825	0.760769	FALSE	H__sapiens__1_-755821	11980	NMDAR2B	Q13224
375	acetyl-CoA biosynthetic process|regulation of coenzyme metabolic process|regulation of acyl-CoA biosynthetic process|oxidoreductase activity, acting on the aldehyde or oxo group of donors|acyl-CoA biosynthetic process|acetyl-CoA biosynthetic process from pyruvate|regulation of fatty acid metabolic process|oxidoreductase complex|mitochondrial matrix|cellular respiration|pyruvate metabolic process|…	GO:0006085|GO:0051196|GO:0050812|GO:0016903|GO:0071616|GO:0006086|GO:0019217|GO:1990204|GO:0005759|GO:0045333|GO:0006090|GO:0006099|GO:0010510|GO:0035384|GO:0006084|GO:0015980|GO:0019216|GO:0051193|GO:0009060	258.884	2.15216	-74	0.00169492	105	0.333333	0.063336	ENSG00000131828	ENSP00000440761	5160	PDHA1	-0.280304	Cluster 2	Clustered	16.1318	H__sapiens__1_-707488	query	PDHA	2.21212	NM_001173456	NP_001166927	0.755554	FALSE	H__sapiens__1_-707488	4240	PDHA	P08559
378	positive regulation of protein serine/threonine kinase activity|toll-like receptor signaling pathway|protein kinase regulator activity|regulation of stress-activated MAPK cascade|kinase regulator activity|positive regulation of defense response|toll-like receptor 5 signaling pathway|activation of innate immune response|pattern recognition receptor signaling pathway|TRIF-dependent toll-like recept…	GO:0071902|GO:0002224|GO:0019887|GO:0032872|GO:0019207|GO:0031349|GO:0034146|GO:0002218|GO:0002221|GO:0035666|GO:0034134|GO:0008543|GO:0043405|GO:0043406|GO:0045089|GO:0038123|GO:1901653|GO:0032147|GO:0071375|GO:0034142|GO:0043410|GO:0038179|GO:0034138|GO:0032868|GO:0008286|GO:0038127|GO:0005769|GO:0048011|GO:0000187|GO:0031098|GO:0032869|GO:0034162|GO:0002756|GO:0044344|GO:0080135|GO:0007173|GO:…	198.965	2.82182	-82	0.00167224	79	0.5	0.0526564	ENSG00000169032	ENSP00000456438	5604	MAP2K1	-0.289616	Cluster 3	Clustered	10.2959	H__sapiens__1_-713500	query	MAP2K1	2.18788	NM_002755	NP_002746	0.748551	FALSE	H__sapiens__1_-713500	3474	PRKMK1	Q02750
380	regulation of blood pressure|striated muscle tissue development|muscle cell differentiation|response to oxidative stress|cardiac muscle tissue development|regulation of cell adhesion|regulation of systemic arterial blood pressure|muscle tissue development|muscle system process|cellular response to reactive oxygen species|regulation of heart contraction|blood circulation|striated muscle cell diffe…	GO:0008217|GO:0014706|GO:0042692|GO:0006979|GO:0048738|GO:0030155|GO:0003073|GO:0060537|GO:0003012|GO:0034614|GO:0008016|GO:0008015|GO:0051146|GO:0034599|GO:0055002|GO:0060047|GO:0000302|GO:0003015|GO:0090257|GO:0045785|GO:0044057|GO:0003013|GO:0031253|GO:0010638|GO:0032587	445.614	3.11326	-54	0.00175439	107	0.5	0.070575	ENSG00000140416	ENSP00000477929	7168	TPM1	-0.29082	Cluster 6	Clustered	6.04842	H__sapiens__1_-708957	query	TPM1	2.27273	NM_001301289	NP_001288218	0.74765	FALSE	H__sapiens__1_-708957	7182	CMH3	P09493
381	response to glucagon|cellular response to peptide|response to peptide|cellular response to peptide hormone stimulus|energy reserve metabolic process|response to peptide hormone|energy derivation by oxidation of organic compounds|PDZ domain binding|cellular response to glucagon stimulus	GO:0033762|GO:1901653|GO:1901652|GO:0071375|GO:0006112|GO:0043434|GO:0015980|GO:0030165|GO:0071377	270.601	2.54736	-72	0.00170068	93	0.5	0.0522917	ENSG00000172380	ENSP00000360021	55970	GNG12	-0.218649	Cluster 1	Clustered	22.3915	H__sapiens__1_-714300	query	GNG12	2.21818	NM_018841	NP_061329	0.803604	FALSE	H__sapiens__1_-714300	4200		Q9UBI6
383	electron transport chain|proton transport|respiratory electron transport chain|energy derivation by oxidation of organic compounds|hydrogen transport|cellular respiration|mitochondrial membrane|organelle inner membrane|mitochondrial inner membrane|monovalent inorganic cation transport|hydrogen ion transmembrane transport	GO:0022900|GO:0015992|GO:0022904|GO:0015980|GO:0006818|GO:0045333|GO:0031966|GO:0019866|GO:0005743|GO:0015672|GO:1902600	204.025	2.57262	-82	0.00166945	83	0.333333	0.0545583	ENSG00000135940	ENSP00000258424	1329	COX5B	-0.290928	Cluster 2	Clustered	16.6235	H__sapiens__1_-708169	query	COX5B	2.18485	NM_001862	NP_001853	0.74757	FALSE	H__sapiens__1_-708169	3360		P10606
385	nucleoside triphosphate biosynthetic process|hexose metabolic process|glucose metabolic process|ribonucleoside triphosphate biosynthetic process|purine nucleoside triphosphate biosynthetic process|secretory granule lumen|ribose phosphate biosynthetic process|exocytosis|purine nucleoside biosynthetic process|muscle system process|platelet alpha granule lumen|ATP biosynthetic process|glycolysis|rib…	GO:0009142|GO:0019318|GO:0006006|GO:0009201|GO:0009145|GO:0034774|GO:0046390|GO:0006887|GO:0042451|GO:0003012|GO:0031093|GO:0006754|GO:0006096|GO:0009161|GO:0046365|GO:0031983|GO:0002576|GO:0009127|GO:0031091|GO:0060205|GO:0006094|GO:0016051|GO:0009126|GO:0046716|GO:0005996|GO:0009206|GO:0019319|GO:0046129|GO:0046034|GO:0046364|GO:0006007|GO:0009152|GO:0006164|GO:0009156|GO:0009167|GO:0016052|GO:…	350.707	2.4829	-61	0.0017331	107	0.333333	0.0728668	ENSG00000149925	ENSP00000490719	226	ALDOA	-0.291941	Cluster 4	Clustered	11.7093	H__sapiens__1_-710262	query	ALDOA	2.25152	NM_184043	NP_908932	0.746813	FALSE	H__sapiens__1_-710262	6982		P04075
386	monosaccharide biosynthetic process|hexose metabolic process|glucose metabolic process|glucose catabolic process|carbohydrate catabolic process|hexose catabolic process|glycolysis|monosaccharide catabolic process|single-organism carbohydrate catabolic process|gluconeogenesis|carbohydrate biosynthetic process|monosaccharide metabolic process|hexose biosynthetic process	GO:0046364|GO:0019318|GO:0006006|GO:0006007|GO:0016052|GO:0019320|GO:0006096|GO:0046365|GO:0044724|GO:0006094|GO:0016051|GO:0005996|GO:0019319	621.25	3.08664	-42	0.00179211	128	0.5	0.0816168	ENSG00000111674	ENSP00000476112	2026	ENO2	-0.289154	Cluster 3	Clustered	10.2256	H__sapiens__1_-704907	query	ENO2	2.30909	NM_001975	NP_001966	0.748897	FALSE	H__sapiens__1_-704907	9774		P09104
388	carboxylic acid transport|monocarboxylic acid transport|regulation of ERK1 and ERK2 cascade|negative regulation of phosphorylation|adrenergic receptor binding|negative regulation of ERK1 and ERK2 cascade|regulation of sodium ion transport|acid secretion|peptide transport|regulation of ion transmembrane transport|regulation of ion transmembrane transporter activity|ERK1 and ERK2 cascade|lipid loca…	GO:0046942|GO:0015718|GO:0070372|GO:0042326|GO:0031690|GO:0070373|GO:0002028|GO:0046717|GO:0015833|GO:0034765|GO:0032412|GO:0070371|GO:0010876|GO:0070851|GO:0010959|GO:0032409|GO:0010563|GO:0043409|GO:0097193|GO:0006869|GO:0015849|GO:0015992|GO:0006818|GO:0048015|GO:0010640|GO:0043491|GO:0030165|GO:0015672|GO:0034762|GO:0042886|GO:0045936|GO:0022898|GO:0043269|GO:2001233|GO:0031253|GO:1902532|GO:…	210.059	3.59605	-88	0.00165563	66	0.333333	0.0466277	ENSG00000109062	ENSP00000464982	9368	SLC9A3R1	-0.292478	Cluster 5	Clustered	7.46976	H__sapiens__1_-704602	query	SLC9A3R1	2.1697	NM_004252	NP_004243	0.746411	FALSE	H__sapiens__1_-704602	3208	NHERF	O14745
390	receptor metabolic process|adrenergic receptor binding|peptidyl-serine modification|regulation of phospholipase C activity|catecholamine secretion|muscle system process|cellular response to fibroblast growth factor stimulus|negative regulation of multicellular organismal process|positive regulation of lipase activity|epidermal growth factor receptor signaling pathway|regulation of heart contracti…	GO:0043112|GO:0031690|GO:0018209|GO:1900274|GO:0050432|GO:0003012|GO:0044344|GO:0051241|GO:0060193|GO:0007173|GO:0008016|GO:0008015|GO:0006898|GO:0010863|GO:0008543|GO:0071774|GO:0051952|GO:0060047|GO:0007213|GO:0010517|GO:0031623|GO:0003015|GO:0090257|GO:0045744|GO:0060191|GO:0044057|GO:0018105|GO:0003013|GO:0015850|GO:0008277|GO:0015844|GO:0010518|GO:0007202|GO:0038179|GO:0051047|GO:0050433|GO:…	357.237	2.64033	-70	0.00170648	103	0.333333	0.0549336	ENSG00000173020	ENSP00000434126	156	GRK2	-0.292606	Cluster 5	Clustered	7.48171	H__sapiens__1_-714436	query	ADRBK1	2.22424	NM_001619	NP_001610	0.746316	FALSE	H__sapiens__1_-714436	5588	BARK1	P25098
394	response to lipid|negative regulation of protein transport|regulation of steroid biosynthetic process|membrane protein proteolysis|regulation of protein catabolic process|regulation of cell adhesion|peptidyl-serine modification|negative regulation of signal transduction in absence of ligand|regulatory region nucleic acid binding|nitric oxide biosynthetic process|nitric oxide metabolic process|res…	GO:0033993|GO:0051224|GO:0050810|GO:0033619|GO:0042176|GO:0030155|GO:0018209|GO:1901099|GO:0001067|GO:0006809|GO:0046209|GO:0048545|GO:0050709|GO:0050995|GO:1901617|GO:0009306|GO:0042368|GO:0043406|GO:0002761|GO:0033157|GO:2000147|GO:0006913|GO:0018105|GO:0043410|GO:0046824|GO:0002573|GO:0048871|GO:0043491|GO:0006954|GO:0002237|GO:0051091|GO:0090316|GO:0032722|GO:0032642|GO:2001233|GO:0002687|GO:…	323.978	4.92673	-84	0.00166667	65	0.333333	0.0404038	ENSG00000232810	ENSP00000410668	7124	TNF	-0.292749	Cluster 7	Clustered	5.5	H__sapiens__1_-720940	query	TNF	2.18182	NM_000594	NP_000585	0.746209	FALSE	H__sapiens__1_-720940	4334	TNFSF2	P01375
396	monosaccharide biosynthetic process|hexose metabolic process|glucose metabolic process|glucose catabolic process|carbohydrate catabolic process|response to virus|hexose catabolic process|glycolysis|monosaccharide catabolic process|single-organism carbohydrate catabolic process|gluconeogenesis|regulation of growth|carbohydrate biosynthetic process|monosaccharide metabolic process|hexose biosynthet…	GO:0046364|GO:0019318|GO:0006006|GO:0006007|GO:0016052|GO:0009615|GO:0019320|GO:0006096|GO:0046365|GO:0044724|GO:0006094|GO:0040008|GO:0016051|GO:0005996|GO:0019319	280.769	1.65453	-58	0.00174216	125	0.333333	0.0763704	ENSG00000074800	ENSP00000468392	2023	ENO1	-0.2942	Cluster 2	Clustered	16.0203	H__sapiens__1_-702252	query	ENO1	2.26061	NM_001428	NP_001419	0.745127	FALSE	H__sapiens__1_-702252	5588	PPH	P06733
403	monosaccharide biosynthetic process|hexose metabolic process|glucose metabolic process|glucose catabolic process|carbohydrate catabolic process|hexose catabolic process|isomerase activity|glycolysis|monosaccharide catabolic process|single-organism carbohydrate catabolic process|gluconeogenesis|carbohydrate biosynthetic process|monosaccharide metabolic process|hexose biosynthetic process	GO:0046364|GO:0019318|GO:0006006|GO:0006007|GO:0016052|GO:0019320|GO:0016853|GO:0006096|GO:0046365|GO:0044724|GO:0006094|GO:0016051|GO:0005996|GO:0019319	208.587	2.03697	-66	0.00171821	97	0.333333	0.068992	ENSG00000282019	ENSP00000488871	2821	GPI	-0.29509	Cluster 4	Clustered	12.6429	H__sapiens__1_-704033	query	GPI	2.23636	NM_001289790	NP_001276719	0.744464	FALSE	H__sapiens__1_-704033	4618	AMF	P06744
409			425.512	2.88713	-48	0.00177305	113	0.5	0.0830317	ENSG00000168439	ENSP00000445957	10963	STIP1	-0.296319	Cluster 2	Clustered	14.9345	H__sapiens__1_-713361	query	STIP1	2.29091	NM_006819	NP_006810	0.74355	FALSE	H__sapiens__1_-713361	7760	STI1	P31948
410	toll-like receptor signaling pathway|coated vesicle|regulation of immune effector process|regulation of cysteine-type endopeptidase activity involved in apoptotic process|positive regulation of defense response|T cell activation|activation of innate immune response|organelle inner membrane|unfolded protein binding|leukocyte mediated immunity|ribonucleoside monophosphate metabolic process|pattern …	GO:0002224|GO:0030135|GO:0002697|GO:0043281|GO:0031349|GO:0042110|GO:0002218|GO:0019866|GO:0051082|GO:0002443|GO:0009161|GO:0002221|GO:0009128|GO:0051131|GO:0009125|GO:0052547|GO:0003725|GO:0009126|GO:0006200|GO:0009169|GO:0001819|GO:0005743|GO:0045089|GO:0035966|GO:0051087|GO:0046034|GO:0031647|GO:2000116|GO:0016887|GO:0006457|GO:0032675|GO:0009167|GO:0032635|GO:0002755|GO:0005759|GO:0032755|GO:…	124.049	1.51939	-81	0.00167504	91	0.333333	0.0591122	ENSG00000144381	ENSP00000414446	3329	HSPD1	-0.268485	Cluster 2	Clustered	16.7301	H__sapiens__1_-709551	query	HSPD1	2.19091	NM_199440	NP_955472	0.764537	FALSE	H__sapiens__1_-709551	2690	SPG13	P10809
413	coated vesicle membrane|regulation of epidermal growth factor receptor signaling pathway|coated vesicle|clathrin-coated vesicle|clathrin-coated vesicle membrane|antigen processing and presentation of exogenous peptide antigen via MHC class II|cytoplasmic vesicle membrane|endocytic vesicle membrane|regulation of ERBB signaling pathway|neurotrophin signaling pathway|epidermal growth factor receptor…	GO:0030662|GO:0042058|GO:0030135|GO:0030136|GO:0030665|GO:0019886|GO:0030659|GO:0030666|GO:1901184|GO:0038179|GO:0007173|GO:0006892|GO:0048193|GO:0030139|GO:0012506|GO:0030669|GO:0038127|GO:0048011	724.516	2.79767	-41	0.00179533	139	0.5	0.0736383	ENSG00000107295	ENSP00000369981	6456	SH3GL2	-0.296393	Cluster 5	Clustered	9.15423	H__sapiens__1_-704387	query	SH3GL2	2.31212	NM_003026	NP_003017	0.743495	FALSE	H__sapiens__1_-704387	10190	SH3P4	Q99962
416	establishment of organelle localization|establishment of vesicle localization|vesicle localization|positive regulation of ion transport|monovalent inorganic cation transport|perinuclear region of cytoplasm|cytoskeleton-dependent intracellular transport|regulation of potassium ion transport|establishment of protein localization to membrane|regulation of establishment of protein localization|positi…	GO:0051656|GO:0051650|GO:0051648|GO:0043270|GO:0015672|GO:0048471|GO:0030705|GO:0043266|GO:0090150|GO:0070201|GO:0043268|GO:0043269|GO:0010970|GO:0007018|GO:0010959|GO:0051640	356.576	3.18385	-72	0.00170068	90	0.5	0.0562801	ENSG00000170759	ENSP00000307078	3799	KIF5B	-0.296901	Cluster 5	Clustered	8.37073	H__sapiens__1_-713894	query	KIF5B	2.21818	NM_004521	NP_004512	0.743117	FALSE	H__sapiens__1_-713894	5544	KNS1	P33176
418	cellular metal ion homeostasis|lysosomal membrane|ferric iron transport|transferrin transport|regulation of immune effector process|response to virus|cellular response to insulin stimulus|transition metal ion homeostasis|iron ion homeostasis|cellular iron ion homeostasis|ribonucleoside monophosphate metabolic process|purine nucleoside monophosphate catabolic process|nucleoside monophosphate catab…	GO:0006875|GO:0005765|GO:0015682|GO:0033572|GO:0002697|GO:0009615|GO:0032869|GO:0055076|GO:0055072|GO:0006879|GO:0009161|GO:0009128|GO:0009125|GO:0055065|GO:0000041|GO:0072512|GO:0009126|GO:0006826|GO:0044437|GO:0006873|GO:0006200|GO:0009169|GO:0046916|GO:0046034|GO:0016887|GO:1901653|GO:1901652|GO:0071375|GO:0009167|GO:0015992|GO:0043434|GO:0006818|GO:0015672|GO:0009158|GO:0005774|GO:0016469|GO:…	178.158	2.90394	-83	0.00166945	74	0.333333	0.0532601	ENSG00000047249	ENSP00000487194	51606	ATP6V1H	-0.21188	Cluster 6	Clustered	7.17829	H__sapiens__1_-701591	query	ATP6V1H	2.18485	NM_213620	NP_998785	0.809062	FALSE	H__sapiens__1_-701591	2966	VMA13	Q9UI12
423	acetyl-CoA biosynthetic process|regulation of coenzyme metabolic process|regulation of acyl-CoA biosynthetic process|acyl-CoA biosynthetic process|acetyl-CoA biosynthetic process from pyruvate|regulation of fatty acid metabolic process|oxidoreductase complex|mitochondrial matrix|pyruvate metabolic process|regulation of acetyl-CoA biosynthetic process from pyruvate|thioester biosynthetic process|a…	GO:0006085|GO:0051196|GO:0050812|GO:0071616|GO:0006086|GO:0019217|GO:1990204|GO:0005759|GO:0006090|GO:0010510|GO:0035384|GO:0006084|GO:0019216|GO:0051193	222.519	2.14417	-65	0.00172117	100	0.333333	0.0710889	ENSG00000150768	ENSP00000435374	1737	DLAT	-0.253952	Cluster 4	Clustered	13.7376	H__sapiens__1_-710328	query	DLAT	2.23939	NM_001931	NP_001922	0.775729	FALSE	H__sapiens__1_-710328	4538	PDC-E2	P10515
425	regulation of peptide hormone secretion|regulation of insulin secretion|guanyl ribonucleotide binding|peptide hormone secretion|regulation of hormone levels|peptide secretion|guanyl nucleotide binding|subthalamus development|alpha-amino acid catabolic process|peptide transport|regulation of hormone secretion|organic acid binding|alpha-amino acid biosynthetic process|hormone secretion|organic acid…	GO:0090276|GO:0050796|GO:0032561|GO:0030072|GO:0010817|GO:0002790|GO:0019001|GO:0021539|GO:1901606|GO:0015833|GO:0046883|GO:0043177|GO:1901607|GO:0046879|GO:0016054|GO:0009065|GO:0009063|GO:0030073|GO:0046395|GO:0090087|GO:0031406|GO:0009914|GO:0043649|GO:0030900|GO:0072350|GO:0009064|GO:0048037|GO:0005759|GO:0043648|GO:0016638|GO:0016597|GO:0006536|GO:1901605|GO:0042886|GO:0023061|GO:0008652|GO:…	261.54	2.63405	-71	0.00170358	90	0.333333	0.0624575	ENSG00000148672	ENSP00000277865	2746	GLUD1	-0.254805	Cluster 4	Clustered	12.973	H__sapiens__1_-710114	query	GLUD1	2.22121	NM_005271	NP_005262	0.775068	FALSE	H__sapiens__1_-710114	4356	GLUD	P00367
429	intracellular receptor signaling pathway|transcription regulatory region DNA binding|regulatory region DNA binding|regulation of growth|covalent chromatin modification|androgen receptor signaling pathway|histone deacetylation|histone modification|regulatory region nucleic acid binding|mitochondrial membrane|organelle inner membrane|mitochondrial inner membrane	GO:0030522|GO:0044212|GO:0000975|GO:0040008|GO:0016569|GO:0030521|GO:0016575|GO:0016570|GO:0001067|GO:0031966|GO:0019866|GO:0005743	364.469	3.26768	-60	0.00173611	99	0.333333	0.0730355	ENSG00000167085	ENSP00000484113	5245	PHB	-0.288398	Cluster 4	Clustered	12.7976	H__sapiens__1_-713013	query	PHB	2.25455	NM_002634	NP_002625	0.749463	FALSE	H__sapiens__1_-713013	6054	PHB1	P35232
431	G2/M transition of mitotic cell cycle|'de novo' protein folding|protein folding|platelet degranulation|cell cycle G2/M phase transition|microtubule|'de novo' posttranslational protein folding|exocytosis|platelet activation	GO:0000086|GO:0006458|GO:0006457|GO:0002576|GO:0044839|GO:0005874|GO:0051084|GO:0006887|GO:0030168	366.763	2.3883	-59	0.00173913	116	0.333333	0.0729528	ENSG00000127824	ENSP00000416992	7277	TUBA4A	-0.297281	Cluster 2	Clustered	15.109	H__sapiens__1_-706936	query	TUBA1	2.25758	NM_006000	NP_005991	0.742835	FALSE	H__sapiens__1_-706936	6050	TUBA1	P68366
433	monosaccharide biosynthetic process|hexose metabolic process|glucose metabolic process|glucose catabolic process|carbohydrate catabolic process|cofactor binding|hexose catabolic process|monosaccharide catabolic process|NADP metabolic process|single-organism carbohydrate catabolic process|carbohydrate biosynthetic process|energy reserve metabolic process|energy derivation by oxidation of organic c…	GO:0046364|GO:0019318|GO:0006006|GO:0006007|GO:0016052|GO:0048037|GO:0019320|GO:0046365|GO:0006739|GO:0044724|GO:0016051|GO:0006112|GO:0015980|GO:0005996	163.296	2.24498	-81	0.00167504	80	0.333333	0.0558186	ENSG00000163931	ENSP00000418340	7086	TKT	-0.268551	Cluster 4	Clustered	13.5121	H__sapiens__1_-712175	query	TKT	2.19091	NM_001258028	NP_001244957	0.764486	FALSE	H__sapiens__1_-712175	2924		P29401
436	regulation of peptide hormone secretion|carboxylic acid transport|regulation of insulin secretion|peptide hormone secretion|regulation of hormone levels|synaptic vesicle localization|regulation of neurotransmitter transport|peptide secretion|establishment of vesicle localization|exocytosis|vesicle localization|synaptic vesicle transport|acid secretion|peptide transport|regulation of hormone secre…	GO:0090276|GO:0046942|GO:0050796|GO:0030072|GO:0010817|GO:0097479|GO:0051588|GO:0002790|GO:0051650|GO:0006887|GO:0051648|GO:0048489|GO:0046717|GO:0015833|GO:0046883|GO:0001505|GO:0002576|GO:0031091|GO:0021700|GO:0014047|GO:0046879|GO:0050804|GO:0006112|GO:0030073|GO:0090087|GO:0051656|GO:0060627|GO:0009914|GO:0017157|GO:0015849|GO:0097480|GO:0048488|GO:0006836|GO:0050805|GO:0030141|GO:0030168|GO:…	351.164	2.01056	-65	0.00172117	121	0.333333	0.0634806	ENSG00000136854	ENSP00000490903	6812	STXBP1	-0.297419	Cluster 2	Clustered	15.3243	H__sapiens__1_-708337	query	STXBP1	2.23939	NM_003165	NP_003156	0.742733	FALSE	H__sapiens__1_-708337	5872	UNC18	P61764
441	nucleoside triphosphate biosynthetic process|active transmembrane transporter activity|purine nucleoside triphosphate biosynthetic process|mitochondrial ATP synthesis coupled proton transport|respiratory electron transport chain|regulation of epithelial cell proliferation|epithelial cell proliferation|purine nucleoside biosynthetic process|organelle inner membrane|energy coupled proton transport,…	GO:0009142|GO:0022804|GO:0009145|GO:0042776|GO:0022904|GO:0050678|GO:0050673|GO:0042451|GO:0019866|GO:0015985|GO:0015986|GO:0005743|GO:0046129|GO:0001935|GO:0015399|GO:0042625|GO:0005759|GO:0015992|GO:0045333|GO:0015672|GO:0015405|GO:0042455|GO:0016469|GO:0001936|GO:0016820|GO:0031966|GO:0009168|GO:0045259|GO:0009201|GO:0046390|GO:0042626|GO:0006754|GO:0009161|GO:0009128|GO:0009127|GO:0043492|GO:…	463.968	1.82993	-45	0.00178253	151	0.333333	0.086852	ENSG00000152234	ENSP00000468618	498	ATP5A1	-0.29775	Cluster 2	Clustered	17.5759	H__sapiens__1_-710507	query	ATP5A1	2.3	NM_004046	NP_004037	0.742487	FALSE	H__sapiens__1_-710507	8098	ORM	P25705
450	cellular metal ion homeostasis|ferric iron transport|transferrin transport|transition metal ion homeostasis|iron ion homeostasis|cellular iron ion homeostasis|coated pit|receptor-mediated endocytosis|double-stranded RNA binding|metal ion homeostasis|transition metal ion transport|cellular cation homeostasis|trivalent inorganic cation transport|iron ion transport|cellular ion homeostasis|cellular …	GO:0006875|GO:0015682|GO:0033572|GO:0055076|GO:0055072|GO:0006879|GO:0005905|GO:0006898|GO:0003725|GO:0055065|GO:0000041|GO:0030003|GO:0072512|GO:0006826|GO:0006873|GO:0046916|GO:0072562	290.281	3.16153	-67	0.00171527	88	0.333333	0.0658371	ENSG00000072274	ENSP00000414015	7037	TFRC	-0.256572	Cluster 5	Clustered	7.92597	H__sapiens__1_-702162	query	TFRC	2.23333	NM_003234	NP_003225	0.773699	FALSE	H__sapiens__1_-702162	5348	TFR1	P02786
456	electron transport chain|oxidative phosphorylation|inorganic cation transmembrane transporter activity|proton transport|respiratory chain|respiratory electron transport chain|hydrogen transport|cellular respiration|organelle inner membrane|monovalent inorganic cation transport|hydrogen ion transmembrane transporter activity|mitochondrial respiratory chain|mitochondrial membrane part|energy deriva…	GO:0022900|GO:0006119|GO:0022890|GO:0015992|GO:0070469|GO:0022904|GO:0006818|GO:0045333|GO:0019866|GO:0015672|GO:0015078|GO:0005746|GO:0044455|GO:0015980|GO:0031966|GO:0005743|GO:0009060|GO:1902600	387.88	2.94488	-58	0.00174216	102	0.333333	0.0728799	ENSG00000010256	ENSP00000393696	7384	UQCRC1	-0.299133	Cluster 2	Clustered	17.9463	H__sapiens__1_-701225	query	UQCRC1	2.26061	NM_003365	NP_003356	0.741461	FALSE	H__sapiens__1_-701225	6878	UQCR1	P31930
458	transcription regulatory region DNA binding|circadian regulation of gene expression|regulatory region DNA binding|rhythmic process|regulatory region nucleic acid binding|core promoter binding	GO:0044212|GO:0032922|GO:0000975|GO:0048511|GO:0001067|GO:0001047	165.205	2.47291	-96	0.00163399	65	0.333333	0.0401578	ENSG00000133794	ENSP00000436721	406	ARNTL	-0.299444		Unclustered	3.5195	H__sapiens__1_-707778	query	ARNTL	2.14545	NM_001297724	NP_001284653	0.741231	FALSE	H__sapiens__1_-707778	2704	PASD3	O00327
460	negative regulation of protein serine/threonine kinase activity|response to lipid|regulation of steroid biosynthetic process|regulation of histone modification|membrane protein proteolysis|regulation of protein catabolic process|regulation of cell adhesion|positive regulation of T cell proliferation|hyaluronan metabolic process|negative regulation of signal transduction in absence of ligand|icosa…	GO:0071901|GO:0033993|GO:0050810|GO:0031056|GO:0033619|GO:0042176|GO:0030155|GO:0042102|GO:0030212|GO:1901099|GO:0071715|GO:0006809|GO:0046209|GO:0003012|GO:0002443|GO:0050995|GO:0033673|GO:0070851|GO:1901617|GO:0051348|GO:0042368|GO:0051302|GO:0043406|GO:0010574|GO:0090068|GO:0033157|GO:1901653|GO:0006869|GO:1901571|GO:0006913|GO:0015849|GO:0044057|GO:0043410|GO:0046824|GO:0048871|GO:0043491|GO:…	93.1606	4.2207	-117	0.00157729	36	0.333333	0.0203602	ENSG00000125538	ENSP00000409680	3553	IL1B	-0.303274	Cluster 9	Clustered	3.17333	H__sapiens__1_-706656	query	IL1B	2.07879	NM_000576	NP_000567	0.738397	FALSE	H__sapiens__1_-706656	1422	IL1F2	P01584
461			334.987	3.60398	-70	0.00170648	82	0.5	0.0554905	ENSG00000112531	ENSP00000443690	9444	QKI	-0.187438	Cluster 6	Clustered	5.95429	H__sapiens__1_-705058	query	QKI	2.22424	NM_206855	NP_996737	0.829081	FALSE	H__sapiens__1_-705058	4884	QK3	Q96PU8
463	coated vesicle|ferric iron transport|transferrin transport|regulation of polysaccharide metabolic process|polysaccharide biosynthetic process|receptor metabolic process|antigen processing and presentation of exogenous peptide antigen via MHC class II|hyaluronan metabolic process|receptor-mediated endocytosis|regulation of carbohydrate metabolic process|endocytic vesicle|double-stranded RNA bindin…	GO:0030135|GO:0015682|GO:0033572|GO:0032881|GO:0000271|GO:0043112|GO:0019886|GO:0030212|GO:0006898|GO:0006109|GO:0030139|GO:0003725|GO:0000041|GO:0016051|GO:0072512|GO:0006826|GO:0012506|GO:0032885|GO:0030662|GO:0031623|GO:0030136|GO:0030665|GO:0030659|GO:0030666|GO:0007067|GO:0030213|GO:0005976|GO:0006892|GO:0048193|GO:0030669|GO:0043255	770.4	3.02291	-30	0.0018315	147	0.5	0.092257	ENSG00000141367	ENSP00000479606	1213	CLTC	-0.306558	Cluster 5	Clustered	8.82668	H__sapiens__1_-709085	query	CLTC	2.34545	NM_004859	NP_004850	0.735976	FALSE	H__sapiens__1_-709085	12870	Hc	Q00610
466	cellular metal ion homeostasis|lysosomal membrane|active transmembrane transporter activity|ferric iron transport|transferrin transport|cellular response to insulin stimulus|transition metal ion homeostasis|ATPase activity, coupled to transmembrane movement of substances|iron ion homeostasis|cellular iron ion homeostasis|ATPase activity, coupled to movement of substances|metal ion homeostasis|tra…	GO:0006875|GO:0005765|GO:0022804|GO:0015682|GO:0033572|GO:0032869|GO:0055076|GO:0042626|GO:0055072|GO:0006879|GO:0043492|GO:0055065|GO:0000041|GO:0072512|GO:0006826|GO:0044437|GO:0006873|GO:0046916|GO:0015399|GO:0016887|GO:1901653|GO:0042625|GO:1901652|GO:0071375|GO:0022890|GO:0015992|GO:0043434|GO:0006818|GO:0015672|GO:0015405|GO:0019829|GO:0005774|GO:0015078|GO:0016820|GO:0032868|GO:0030003|GO:…	376.072	2.44638	-52	0.00176056	119	0.5	0.0792875	ENSG00000147416	ENSP00000430866	526	ATP6V1B2	-0.309311	Cluster 4	Clustered	12.2318	H__sapiens__1_-709961	query	ATP6V1B2	2.27879	NM_001693	NP_001684	0.733953	FALSE	H__sapiens__1_-709961	6746	HO57	P21281
469	positive regulation of protein serine/threonine kinase activity|positive regulation of cell migration|positive regulation of DNA metabolic process|behavior|positive regulation of response to external stimulus|striated muscle tissue development|muscle cell differentiation|cardiac muscle tissue development|regulation of phospholipase C activity|muscle tissue development|regulation of ion transmembr…	GO:0071902|GO:0030335|GO:0051054|GO:0007610|GO:0032103|GO:0014706|GO:0042692|GO:0048738|GO:1900274|GO:0060537|GO:0034765|GO:0060193|GO:0051783|GO:0070851|GO:0016324|GO:0051146|GO:0008543|GO:0043405|GO:0010959|GO:0098590|GO:0051302|GO:0070374|GO:0014910|GO:0043406|GO:0045840|GO:0090068|GO:2000147|GO:0072511|GO:0007346|GO:0045834|GO:0043410|GO:0051785|GO:0048015|GO:0007067|GO:0034762|GO:0038179|GO:…	257.518	4.12902	-94	0.00163934	61	0.333333	0.0351166	ENSG00000113721	ENSP00000430715	5159	PDGFRB	-0.309806	Cluster 8	Clustered	4.50758	H__sapiens__1_-705203	query	PDGFRB	2.15152	NM_002609	NP_002600	0.73359	FALSE	H__sapiens__1_-705203	4106	PDGFR1	P09619
471	epithelial cell differentiation|regulation of blood pressure|response to oxygen levels|negative regulation of phosphorylation|response to hypoxia|cytokine receptor binding|regulation of nitric-oxide synthase activity|regulation of cell adhesion|regulation of systemic arterial blood pressure|muscle tissue development|regulation of epithelial cell proliferation|epithelial cell proliferation|vasculo…	GO:0030855|GO:0008217|GO:0070482|GO:0042326|GO:0001666|GO:0005126|GO:0050999|GO:0030155|GO:0003073|GO:0060537|GO:0050678|GO:0050673|GO:0001570|GO:0001885|GO:0051354|GO:0008015|GO:0036293|GO:0051341|GO:0001525|GO:0010563|GO:0090287|GO:0001935|GO:0032768|GO:0031952|GO:0003013|GO:0045936|GO:0001933|GO:0001936|GO:0002064|GO:0043235	67.2246	3.72183	-116	0.00157978	37	0.333333	0.0233586	ENSG00000106991	ENSP00000479015	2022	ENG	-0.277881		Unclustered	2.66667	H__sapiens__1_-704356	query	ENG	2.08182	NM_001278138	NP_001265067	0.757387	FALSE	H__sapiens__1_-704356	982	ORW1	P17813
473	response to lipid|positive regulation of T cell proliferation|peptidyl-serine modification|leukocyte mediated immunity|response to steroid hormone|positive regulation of peptidyl-tyrosine phosphorylation|growth factor receptor binding|protein secretion|regulation of JAK-STAT cascade|myeloid cell apoptotic process|regulation of vascular endothelial growth factor production|regulation of intracellu…	GO:0033993|GO:0042102|GO:0018209|GO:0002443|GO:0048545|GO:0050731|GO:0070851|GO:0009306|GO:0046425|GO:0033028|GO:0010574|GO:0033157|GO:2000147|GO:0006913|GO:0018105|GO:0043410|GO:0046824|GO:0030168|GO:0006954|GO:0002237|GO:0051091|GO:0090316|GO:0032722|GO:0032642|GO:0002687|GO:0032602|GO:0033002|GO:0051170|GO:0050729|GO:0010817|GO:0006979|GO:0034504|GO:0002790|GO:0042306|GO:0015833|GO:0097285|GO:…	133.624	3.88173	-105	0.00160772	46	0.333333	0.0251712	ENSG00000136244	ENSP00000405150	3569	IL6	-0.311055	Cluster 8	Clustered	4.56	H__sapiens__1_-708233	query	IL6	2.11515	NM_001318095	NP_001305024	0.732674	FALSE	H__sapiens__1_-708233	1808	IL-6	P05231
476	intrinsic apoptotic signaling pathway|response to oxygen levels|response to hypoxia|response to oxidative stress|oxidoreductase complex|intrinsic apoptotic signaling pathway in response to oxidative stress|regulation of cellular response to oxidative stress|alpha-amino acid metabolic process|regulation of cellular response to stress|response to decreased oxygen levels|regulation of apoptotic sign…	GO:0097193|GO:0070482|GO:0001666|GO:0006979|GO:1990204|GO:0008631|GO:1900407|GO:1901605|GO:0080135|GO:0036293|GO:2001233|GO:1902175|GO:0006575|GO:0034599	147.095	1.94298	-80	0.00167785	84	0.333333	0.0592387	ENSG00000185624	ENSP00000461791	5034	P4HB	-0.311587	Cluster 3	Clustered	10.6783	H__sapiens__1_-717038	query	PDIA1	2.19394	NM_000918	NP_000909	0.732284	FALSE	H__sapiens__1_-717038	3112	PROHB	P07237
478	neuronal cell body|synaptic vesicle localization|dendrite development|cell body|regulation of neuron death|establishment of vesicle localization|peptidyl-serine modification|exocytosis|vesicle localization|dendritic spine organization|synaptic vesicle transport|neuron projection|neuron part|cell-type specific apoptotic process|regulation of neurotransmitter levels|receptor activator activity|dend…	GO:0043025|GO:0097479|GO:0016358|GO:0044297|GO:1901214|GO:0051650|GO:0018209|GO:0006887|GO:0051648|GO:0097061|GO:0048489|GO:0043005|GO:0097458|GO:0097285|GO:0001505|GO:0030546|GO:0060997|GO:0060996|GO:0050804|GO:0048589|GO:0014069|GO:0044456|GO:0045202|GO:0030424|GO:0051402|GO:0051656|GO:0048167|GO:0097480|GO:0048488|GO:0006836|GO:0018105|GO:0010975|GO:0050767|GO:0023061|GO:0051960|GO:0016079|GO:…	338.03	2.97905	-67	0.00171527	97	0.333333	0.0649143	ENSG00000164885	ENSP00000419782	1020	CDK5	-0.313362	Cluster 3	Clustered	9.71608	H__sapiens__1_-712462	query	CDK5	2.23333	NM_004935	NP_004926	0.730985	FALSE	H__sapiens__1_-712462	5594	PSSALRE	Q00535
480	negative regulation of peptidase activity|reactive oxygen species metabolic process|negative regulation of extrinsic apoptotic signaling pathway|peptide metabolic process|regulation of cysteine-type endopeptidase activity involved in apoptotic process|response to oxidative stress|regulation of protein catabolic process|response to hydrogen peroxide|regulation of epithelial cell proliferation|epit…	GO:0010466|GO:0072593|GO:2001237|GO:0006518|GO:0043281|GO:0006979|GO:0042176|GO:0042542|GO:0050678|GO:0050673|GO:0034614|GO:0008637|GO:0008015|GO:0010035|GO:0052547|GO:0034599|GO:0043154|GO:0043603|GO:0009314|GO:0010951|GO:0060047|GO:0016684|GO:0010821|GO:0000302|GO:0016209|GO:2000116|GO:0003015|GO:0097191|GO:2000117|GO:0090201|GO:0005759|GO:0042743|GO:0007005|GO:0003013|GO:2001234|GO:0052548|GO:…	172.541	4.02355	-93	0.00164204	57	0.333333	0.0415659	ENSG00000233276	ENSP00000478837	2876	GPX1	-0.315928	Cluster 7	Clustered	5.63563	H__sapiens__1_-733670	query	GPX1	2.15455	NM_201397	NP_958799	0.729112	FALSE	H__sapiens__1_-733670	2644		P07203
481	response to glucagon|cellular response to peptide|response to peptide|cellular response to peptide hormone stimulus|energy reserve metabolic process|response to peptide hormone|GTPase activity|energy derivation by oxidation of organic compounds|cellular response to glucagon stimulus	GO:0033762|GO:1901653|GO:1901652|GO:0071375|GO:0006112|GO:0043434|GO:0003924|GO:0015980|GO:0071377	222.466	2.50467	-84	0.00166667	82	0.333333	0.0410866	ENSG00000127920	ENSP00000248564	2791	GNG11	-0.250408	Cluster 1	Clustered	22.3915	H__sapiens__1_-706945	query	GNG11	2.18182	NM_004126	NP_004117	0.778483	FALSE	H__sapiens__1_-706945	2954	GNGT11	P61952
483	'de novo' protein folding|protein folding|response to virus|microtubule|'de novo' posttranslational protein folding	GO:0006458|GO:0006457|GO:0009615|GO:0005874|GO:0051084	337.356	1.95569	-53	0.00175747	128	0.333333	0.0806328	ENSG00000150753	ENSP00000487128	22948	CCT5	-0.317716	Cluster 1	Clustered	18.9616	H__sapiens__1_-710324	query	CCT5	2.27576	NM_012073	NP_036205	0.72781	FALSE	H__sapiens__1_-710324	6644	KIAA0098	P48643
493	immune response-activating cell surface receptor signaling pathway|immune response-regulating cell surface receptor signaling pathway involved in phagocytosis|regulation of protein catabolic process|nitric oxide biosynthetic process|nitric oxide metabolic process|intracellular receptor signaling pathway|positive regulation of nitric oxide biosynthetic process|double-stranded RNA binding|negative …	GO:0002429|GO:0002433|GO:0042176|GO:0006809|GO:0046209|GO:0030522|GO:0045429|GO:0003725|GO:0009895|GO:0038094|GO:0003823|GO:0045428|GO:0035966|GO:0002768|GO:0023026|GO:0038096|GO:0071346|GO:0042177|GO:0006909|GO:0023023|GO:0002431|GO:0034341|GO:0045088|GO:0006986|GO:0038093	428.944	2.30431	-50	0.00176678	131	0.333333	0.0823186	ENSG00000096384	ENSP00000481908	3326	HSP90AB1	-0.318234	Cluster 2	Clustered	17.702	H__sapiens__1_-703039	query	HSP90AB1	2.28485	NM_007355	NP_031381	0.727433	FALSE	H__sapiens__1_-703039	7626	HSPCB	P08238
497	protein kinase binding|guanyl ribonucleotide binding|guanyl nucleotide binding|GTP binding	GO:0019901|GO:0032561|GO:0019001|GO:0005525	327.552	2.44851	-62	0.0017301	108	0.333333	0.0723479	ENSG00000156508	ENSP00000479609	1915	EEF1A1	-0.321565	Cluster 4	Clustered	13.906	H__sapiens__1_-710991	query	EEF1A1	2.24848	NM_001402	NP_001393	0.725014	FALSE	H__sapiens__1_-710991	5882	LENG7	P68104
501	neuron apoptotic process|monosaccharide biosynthetic process|regulation of protein stability|hexose metabolic process|glucose metabolic process|glucose catabolic process|transferase activity, transferring nitrogenous groups|carbohydrate catabolic process|oxidoreductase activity, acting on the aldehyde or oxo group of donors|cellular response to interferon-gamma|hexose catabolic process|glycolysis…	GO:0051402|GO:0046364|GO:0031647|GO:0019318|GO:0006006|GO:0006007|GO:0016769|GO:0016052|GO:0016903|GO:0071346|GO:0019320|GO:0006096|GO:0097285|GO:0046365|GO:0034341|GO:0044724|GO:0006094|GO:0070997|GO:0016051|GO:0005996|GO:0019319	521.466	1.86891	-37	0.00180832	159	0.5	0.092129	ENSG00000111640	ENSP00000478864	2597	GAPDH	-0.329126	Cluster 2	Clustered	15.9124	H__sapiens__1_-704893	query	GAPDH	2.32424	NM_002046	NP_002037	0.719552	FALSE	H__sapiens__1_-704893	9506	GAPD	P04406
506	immune response-activating cell surface receptor signaling pathway|immune response-regulating cell surface receptor signaling pathway involved in phagocytosis|protein folding|immune response-regulating cell surface receptor signaling pathway|forebrain development|Fc-gamma receptor signaling pathway involved in phagocytosis|'de novo' posttranslational protein folding|subthalamus development|multic…	GO:0002429|GO:0002433|GO:0006457|GO:0002768|GO:0030900|GO:0038096|GO:0051084|GO:0021539|GO:0048871|GO:0006909|GO:0002431|GO:0006458|GO:0021536|GO:0021762|GO:0007420|GO:0038094|GO:0038093|GO:0072562	395.13	2.33722	-61	0.0017331	120	0.333333	0.0715046	ENSG00000075624	ENSP00000409264	60	ACTB	-0.330616	Cluster 4	Clustered	14.3171	H__sapiens__1_-702292	query	ACTB	2.25152	NM_001101	NP_001092	0.718481	FALSE	H__sapiens__1_-702292	7066		P60709
509	negative regulation of protein serine/threonine kinase activity|response to lipid|regulation of stress-activated MAPK cascade|kinase regulator activity|peptide metabolic process|negative regulation of ERK1 and ERK2 cascade|response to lipopolysaccharide|transferase activity, transferring alkyl or aryl (other than methyl) groups|negative regulation of multicellular organismal process|negative regu…	GO:0071901|GO:0033993|GO:0032872|GO:0019207|GO:0006518|GO:0070373|GO:0032496|GO:0016765|GO:0051241|GO:0033673|GO:0004364|GO:0043405|GO:0051348|GO:0010563|GO:0043409|GO:0071466|GO:0006805|GO:2001234|GO:0006954|GO:0002237|GO:0001933|GO:0032642|GO:0009410|GO:2001233|GO:0006801|GO:0006575|GO:1902532|GO:2001236|GO:0032602|GO:0072593|GO:2001237|GO:0070372|GO:0042326|GO:0031098|GO:0006979|GO:0050727|GO:…	678.562	3.76486	-48	0.00177305	111	0.5	0.0739002	ENSG00000084207	ENSP00000484929	2950	GSTP1	-0.330639	Cluster 6	Clustered	7.26598	H__sapiens__1_-702601	query	GSTP1	2.29091	NM_000852	NP_000843	0.718464	FALSE	H__sapiens__1_-702601	10464	GSTP	P09211
512	antigen processing and presentation of exogenous peptide antigen via MHC class II|vacuolar part	GO:0019886|GO:0044437	362.026	4.35925	-72	0.00170068	77	0.5	0.0539535	ENSG00000117984	ENSP00000490897	1509	CTSD	-0.331996	Cluster 7	Clustered	5.54932	H__sapiens__1_-705753	query	CTSD	2.21818	NM_001909	NP_001900	0.71749	FALSE	H__sapiens__1_-705753	5050	CPSD	P07339
515	positive regulation of mitotic cell cycle phase transition|negative regulation of phosphorylation|muscle cell differentiation|regulation of mitosis|androgen receptor signaling pathway|regulatory region nucleic acid binding|intracellular receptor signaling pathway|transcription regulatory region DNA binding|regulation of chromosome organization|positive regulation of cell cycle phase transition|re…	GO:1901992|GO:0042326|GO:0042692|GO:0007088|GO:0030521|GO:0001067|GO:0030522|GO:0044212|GO:0033044|GO:1901989|GO:0051783|GO:0033673|GO:0050681|GO:0051348|GO:0051219|GO:0019216|GO:0051302|GO:0010563|GO:0045840|GO:0090068|GO:0051656|GO:0007346|GO:0045445|GO:0051785|GO:0007067|GO:0045936|GO:0006469|GO:0051235|GO:0001933|GO:0007265|GO:0000975|GO:0010638|GO:0045787|GO:0051640|GO:0001047	171.293	3.01873	-97	0.00163132	65	0.333333	0.035143	ENSG00000139687	ENSP00000434702	5925	RB1	-0.337242	Cluster 8	Clustered	3.7861	H__sapiens__1_-708862	query	RB1	2.14242	NM_000321	NP_000312	0.713736	FALSE	H__sapiens__1_-708862	2514	RB	P06400
517	toll-like receptor signaling pathway|stress-activated protein kinase signaling cascade|positive regulation of defense response|response to oxidative stress|toll-like receptor 5 signaling pathway|toll-like receptor 9 signaling pathway|regulatory region nucleic acid binding|activation of innate immune response|MyD88-independent toll-like receptor signaling pathway|cellular response to reactive oxyg…	GO:0002224|GO:0031098|GO:0031349|GO:0006979|GO:0034146|GO:0034162|GO:0001067|GO:0002218|GO:0002756|GO:0034614|GO:0002221|GO:0044212|GO:0038095|GO:0051403|GO:0035666|GO:0034166|GO:0034134|GO:0034599|GO:0038124|GO:0045089|GO:0000302|GO:0038123|GO:0002768|GO:0034142|GO:0002755|GO:0006954|GO:0034138|GO:0045088|GO:0000975|GO:0002758|GO:0038093	281.945	2.99899	-89	0.00165289	80	0.333333	0.040353	ENSG00000170345	ENSP00000452590	2353	FOS	-0.337539	Cluster 7	Clustered	5.65007	H__sapiens__1_-713799	query	FOS	2.16667	NM_005252	NP_005243	0.713524	FALSE	H__sapiens__1_-713799	4150	c-fos	P01100
519	muscle cell differentiation|multicellular organism growth|positive regulation of T cell proliferation|epithelial cell proliferation|muscle system process|positive regulation of peptidyl-tyrosine phosphorylation|regulation of carbohydrate metabolic process|cellular carbohydrate metabolic process|striated muscle cell differentiation|developmental growth|regulation of multicellular organism growth|r…	GO:0042692|GO:0035264|GO:0042102|GO:0050673|GO:0003012|GO:0050731|GO:0006109|GO:0044262|GO:0051146|GO:0048589|GO:0040014|GO:0051302|GO:0046425|GO:0014910|GO:0090068|GO:0006007|GO:0033157|GO:2000147|GO:0051098|GO:0006913|GO:0016052|GO:0044057|GO:0045445|GO:0043410|GO:0010676|GO:0030141|GO:0030168|GO:0090316|GO:2001233|GO:0044275|GO:0043388|GO:0043255|GO:2001236|GO:0033002|GO:0006006|GO:0010675|GO:…	121.895	3.86595	-109	0.0016	46	0.333333	0.0276805	ENSG00000017427	ENSP00000416811	3479	IGF1	-0.2759	Cluster 8	Clustered	3.7619	H__sapiens__1_-701348	query	IGF1	2.10606	NM_001111285	NP_001104755	0.758889	FALSE	H__sapiens__1_-701348	1668	IGFI	P05019
521	cellular response to drug|immune response-regulating cell surface receptor signaling pathway|protein dephosphorylation|response to inorganic substance|Fc-epsilon receptor signaling pathway|calmodulin binding|drug binding|protein serine/threonine phosphatase complex|response to drug|T cell activation|Fc receptor signaling pathway	GO:0035690|GO:0002768|GO:0006470|GO:0010035|GO:0038095|GO:0005516|GO:0008144|GO:0008287|GO:0042493|GO:0042110|GO:0038093	1029.96	2.54051	-11	0.00189753	180	0.5	0.102506	ENSG00000138814	ENSP00000434599	5530	PPP3CA	-0.338668	Cluster 3	Clustered	9.92161	H__sapiens__1_-708744	query	PPP3CA	2.40303	NM_001130692	NP_001124164	0.712719	FALSE	H__sapiens__1_-708744	16442	PPP2B	Q08209
523	lysosomal membrane|response to lipid|extrinsic component of membrane|response to monoamine|regulation of rhodopsin mediated signaling pathway|GTPase activity|neuron part|response to catecholamine|adenylate cyclase-activating G-protein coupled receptor signaling pathway|cellular response to radiation|cellular response to light stimulus|energy reserve metabolic process|vacuolar part|plasma membrane…	GO:0005765|GO:0033993|GO:0019898|GO:0071867|GO:0022400|GO:0003924|GO:0097458|GO:0071869|GO:0007189|GO:0071478|GO:0071482|GO:0006112|GO:0044437|GO:0098590|GO:0009314|GO:0071396|GO:0007187|GO:0007213|GO:0033762|GO:1901653|GO:0007212|GO:0014070|GO:1901652|GO:0071375|GO:0007188|GO:0031234|GO:0071868|GO:0043434|GO:0030168|GO:0008277|GO:0071377|GO:0019897|GO:0005774|GO:0016056|GO:0071214|GO:0071407|GO:…	1369.27	3.30317	-15	0.00188324	176	0.5	0.0982291	ENSG00000078369	ENSP00000483532	2782	GNB1	-0.341487	Cluster 3	Clustered	9.27895	H__sapiens__1_-702398	query	GNB1	2.39091	NM_002074	NP_002065	0.710713	FALSE	H__sapiens__1_-702398	20938		P62873
524	negative regulation of phosphate metabolic process|enzyme inhibitor activity|negative regulation of protein kinase activity|protein kinase regulator activity|negative regulation of protein phosphorylation|negative regulation of phosphorylation|kinase regulator activity|negative regulation of kinase activity|negative regulation of transferase activity|negative regulation of phosphorus metabolic pr…	GO:0045936|GO:0004857|GO:0006469|GO:0019887|GO:0001933|GO:0042326|GO:0019207|GO:0033673|GO:0051348|GO:0010563	64.7264	2.83442	-111	0.00159236	45	0.333333	0.0327579	ENSG00000197045	ENSP00000487065	2764	GMFB	-0.213876		Unclustered	3.84202	H__sapiens__1_-718319	query	GMFB	2.09697	NM_004124	NP_004115	0.807448	FALSE	H__sapiens__1_-718319	1228	GMF	P60983
528	nucleoside triphosphate biosynthetic process|active transmembrane transporter activity|purine nucleoside triphosphate biosynthetic process|mitochondrial ATP synthesis coupled proton transport|respiratory electron transport chain|purine nucleoside biosynthetic process|organelle inner membrane|energy coupled proton transport, down electrochemical gradient|ATP synthesis coupled proton transport|mito…	GO:0009142|GO:0022804|GO:0009145|GO:0042776|GO:0022904|GO:0042451|GO:0019866|GO:0015985|GO:0015986|GO:0005743|GO:0046129|GO:0015399|GO:0042625|GO:0005759|GO:0015992|GO:0045333|GO:0015672|GO:0015405|GO:0042455|GO:0016469|GO:0016820|GO:0030003|GO:0031966|GO:0009168|GO:0045259|GO:0009201|GO:0046390|GO:0042626|GO:0006754|GO:0009161|GO:0009128|GO:0009127|GO:0043492|GO:0009295|GO:0009125|GO:0001525|GO:…	481.014	1.75571	-34	0.00181818	160	0.333333	0.0949706	ENSG00000110955	ENSP00000448428	506	ATP5B	-0.342273	Cluster 1	Clustered	19.8228	H__sapiens__1_-704813	query	ATP5B	2.33333	NM_001686	NP_001677	0.710154	FALSE	H__sapiens__1_-704813	9354	ATPSB	P06576
532	lysosomal membrane|positive regulation of epidermal growth factor receptor signaling pathway|protein kinase regulator activity|kinase regulator activity|hyaluronan metabolic process|regulation of protein tyrosine kinase activity|regulation of ion transmembrane transport|positive regulation of peptidyl-tyrosine phosphorylation|receptor activator activity|regulation of carbohydrate metabolic proces…	GO:0005765|GO:0045742|GO:0019887|GO:0019207|GO:0030212|GO:0061097|GO:0034765|GO:0050731|GO:0030546|GO:0006109|GO:0070851|GO:0007176|GO:0008543|GO:0044437|GO:0010959|GO:0051302|GO:0043406|GO:0090068|GO:0033157|GO:0051098|GO:0006913|GO:1901186|GO:0043410|GO:0046824|GO:0030141|GO:0030168|GO:0034762|GO:0005774|GO:0090316|GO:0043388|GO:0043255|GO:0030545|GO:0051170|GO:0032881|GO:0006816|GO:0007088|GO:…	511.79	4.66482	-71	0.00170358	84	0.5	0.0486507	ENSG00000138798	ENSP00000424316	1950	EGF	-0.311209	Cluster 7	Clustered	5.60324	H__sapiens__1_-708740	query	EGF	2.22121	NM_001963	NP_001954	0.732561	FALSE	H__sapiens__1_-708740	6604		P01133
537	regulation of protein transport|regulation of nervous system development|establishment of protein localization to membrane|regulation of establishment of protein localization|negative regulation of protein transport|regulation of intracellular protein transport|regulation of intracellular transport|Ras protein signal transduction|regulation of neuron projection development|regulation of neurogene…	GO:0051223|GO:0051960|GO:0090150|GO:0070201|GO:0051224|GO:0033157|GO:0032386|GO:0007265|GO:0010975|GO:0050767|GO:0051051	616.568	4.17651	-50	0.00176678	103	0.5	0.0698565	ENSG00000203879	ENSP00000486715	2664	GDI1	-0.344991	Cluster 5	Clustered	8.81174	H__sapiens__1_-720724	query	GDI1	2.28485	NM_001493	NP_001484	0.708226	FALSE	H__sapiens__1_-720724	9294	XAP-4	P31150
538	enzyme inhibitor activity	GO:0004857	366.459	2.61555	-62	0.0017301	105	0.5	0.0611977	ENSG00000074317	ENSP00000479489	6620	SNCB	-0.250773	Cluster 3	Clustered	10.2583	H__sapiens__1_-702234	query	SNCB	2.24848	NM_003085	NP_003076	0.778199	FALSE	H__sapiens__1_-702234	6122		Q16143
541			693.863	4.40097	-44	0.00178571	107	0.333333	0.0777973	ENSG00000126247	ENSP00000487115	826	CAPNS1	-0.346884	Cluster 4	Clustered	11.9787	H__sapiens__1_-706787	query	CAPNS1	2.30303	NM_001749	NP_001740	0.706888	FALSE	H__sapiens__1_-706787	10184	CDPS	P04632
542	post-Golgi vesicle-mediated transport|Golgi vesicle transport	GO:0006892|GO:0048193	429.976	3.55575	-64	0.00172414	95	0.333333	0.0638794	ENSG00000105402	ENSP00000472667	8775	NAPA	-0.289084	Cluster 5	Clustered	8.50363	H__sapiens__1_-704080	query	NAPA	2.24242	NM_003827	NP_003818	0.74895	FALSE	H__sapiens__1_-704080	6982		P54920
546	G-protein coupled receptor signaling pathway, coupled to cyclic nucleotide second messenger|lysosomal membrane|guanyl ribonucleotide binding|response to peptide|adenylate cyclase-inhibiting G-protein coupled receptor signaling pathway|adenylate cyclase-modulating G-protein coupled receptor signaling pathway|G-protein beta/gamma-subunit complex binding|extrinsic component of cytoplasmic side of pl…	GO:0007187|GO:0005765|GO:0032561|GO:1901652|GO:0007193|GO:0007188|GO:0031683|GO:0031234|GO:0019898|GO:0019001|GO:0043434|GO:0003924|GO:0030168|GO:0019897|GO:0005774|GO:0005834|GO:0044437|GO:0005525|GO:0001664	1088.62	3.87327	-32	0.00182482	137	0.5	0.0782786	ENSG00000127955	ENSP00000410572	2770	GNAI1	-0.349117	Cluster 1	Clustered	22.3915	H__sapiens__1_-706954	query	GNAI1	2.33939	NM_002069	NP_002060	0.70531	FALSE	H__sapiens__1_-706954	14574		P63096
548	drug binding	GO:0008144	74.7588	3.34554	-103	0.00161551	45	0.333333	0.0356193	ENSG00000075618	ENSP00000409967	6624	FSCN1	-0.203466	Cluster 7	Clustered	4.69758	H__sapiens__1_-702291	query	FSCN1	2.12424	NM_003088	NP_003079	0.815898	FALSE	H__sapiens__1_-702291	1396	SNL	Q16658
550	protein import into nucleus|nuclear import|protein targeting to nucleus|protein folding|nucleocytoplasmic transport|protein localization to nucleus|phospholipase activity|protein import|maintenance of location|single-organism nuclear import|phospholipase C activity|nuclear transport|lipase activity	GO:0006606|GO:0051170|GO:0044744|GO:0006457|GO:0006913|GO:0034504|GO:0004620|GO:0017038|GO:0051235|GO:1902593|GO:0004629|GO:0051169|GO:0016298	132.09	2.77752	-90	0.00165017	63	0.333333	0.0463214	ENSG00000167004	ENSP00000398005	2923	PDIA3	-0.272724	Cluster 6	Clustered	5.93535	H__sapiens__1_-713000	query	PDIA3	2.16364	NM_005313	NP_005304	0.761303	FALSE	H__sapiens__1_-713000	2362	PI-PLC	P30101
553	positive regulation of protein serine/threonine kinase activity|toll-like receptor signaling pathway|regulation of stress-activated MAPK cascade|positive regulation of defense response|toll-like receptor 5 signaling pathway|peptidyl-serine modification|activation of innate immune response|pattern recognition receptor signaling pathway|receptor-mediated endocytosis|TRIF-dependent toll-like recepto…	GO:0071902|GO:0002224|GO:0032872|GO:0031349|GO:0034146|GO:0018209|GO:0002218|GO:0002221|GO:0006898|GO:0035666|GO:0034134|GO:0008543|GO:0043405|GO:0038094|GO:0043406|GO:0045089|GO:0038123|GO:1901653|GO:0032147|GO:0071375|GO:0034142|GO:0007259|GO:0018105|GO:0043410|GO:0030168|GO:0038179|GO:0034138|GO:0032868|GO:0008286|GO:0038127|GO:0005769|GO:0048011|GO:0002429|GO:0002433|GO:0000187|GO:0031098|GO:…	518.834	1.87831	-43	0.00178891	152	0.5	0.0822199	ENSG00000100030	ENSP00000440842	5594	MAPK1	-0.349934	Cluster 3	Clustered	10.5	H__sapiens__1_-703144	query	MAPK1	2.30606	NM_138957	NP_620407	0.704734	FALSE	H__sapiens__1_-703144	8768	PRKM2	P28482
557	G2/M transition of mitotic cell cycle|cytoskeleton-dependent intracellular transport|'de novo' protein folding|protein folding|cell cycle G2/M phase transition|microtubule|'de novo' posttranslational protein folding	GO:0000086|GO:0030705|GO:0006458|GO:0006457|GO:0044839|GO:0005874|GO:0051084	637.409	2.47751	-38	0.00180505	143	0.5	0.0861252	ENSG00000167552	ENSP00000450268	7846	TUBA1A	-0.354545	Cluster 3	Clustered	10.4798	H__sapiens__1_-713117	query	TUBA1A	2.32121	NM_006009	NP_006000	0.701493	FALSE	H__sapiens__1_-713117	10190	TUBA3	Q71U36
560	'de novo' protein folding|protein folding|chaperone-mediated protein complex assembly|microtubule|'de novo' posttranslational protein folding|unfolded protein binding	GO:0006458|GO:0006457|GO:0051131|GO:0005874|GO:0051084|GO:0051082	433.093	1.98453	-46	0.00177936	143	0.5	0.0864434	ENSG00000166226	ENSP00000450153	10576	CCT2	-0.354769	Cluster 1	Clustered	18.8682	H__sapiens__1_-712794	query	CCT2	2.29697	NM_006431	NP_006422	0.701335	FALSE	H__sapiens__1_-712794	8264	Cctb	P78371
569	establishment of protein localization to mitochondrion|positive regulation of mitochondrial membrane permeability involved in apoptotic process|regulation of mitochondrial membrane permeability involved in apoptotic process|regulation of ion transmembrane transport|regulation of ion transmembrane transporter activity|protein dephosphorylation|vesicle membrane|regulation of metal ion transport|reg…	GO:0072655|GO:1902110|GO:1902108|GO:0034765|GO:0032412|GO:0006470|GO:0012506|GO:0010959|GO:0032409|GO:0010563|GO:0010821|GO:0010822|GO:0031406|GO:0003015|GO:0030900|GO:0035794|GO:0030659|GO:0044057|GO:0007005|GO:0016597|GO:0015672|GO:0034762|GO:1902686|GO:0000086|GO:0090150|GO:0038179|GO:0052548|GO:1901028|GO:1900740|GO:2001233|GO:0021536|GO:0048011|GO:0035304|GO:0007006|GO:1900739|GO:0001844|GO:…	404.286	2.17895	-42	0.00179211	134	0.5	0.0898381	ENSG00000274474	ENSP00000487508	7531	YWHAE	-0.358382	Cluster 4	Clustered	13.8305	H__sapiens__1_-704592	query	YWHAE	2.30909	NM_006761	NP_006752	0.698806	FALSE	H__sapiens__1_-704592	7890	FLJ45465	P62258
574	toll-like receptor signaling pathway|nuclear import|protein targeting to nucleus|stress-activated protein kinase signaling cascade|positive regulation of defense response|protein localization to nucleus|toll-like receptor 5 signaling pathway|toll-like receptor 9 signaling pathway|regulatory region nucleic acid binding|activation of innate immune response|MyD88-independent toll-like receptor signa…	GO:0002224|GO:0051170|GO:0044744|GO:0031098|GO:0031349|GO:0034504|GO:0034146|GO:0034162|GO:0001067|GO:0002218|GO:0002756|GO:0002221|GO:0044212|GO:0038095|GO:0051403|GO:1902593|GO:0035666|GO:0034166|GO:0034134|GO:0038124|GO:0045089|GO:0006606|GO:0038123|GO:0002768|GO:0051098|GO:0006913|GO:0034142|GO:0002755|GO:0017038|GO:0034138|GO:0045088|GO:0000975|GO:0002758|GO:0051169|GO:0038093	969.597	3.40757	-38	0.00180505	138	0.5	0.0738666	ENSG00000177606	ENSP00000360266	3725	JUN	-0.359698	Cluster 6	Clustered	6.59589	H__sapiens__1_-715339	query	JUN	2.32121	NM_002228	NP_002219	0.697887	FALSE	H__sapiens__1_-715339	12710	c-Jun	P05412
577	positive regulation of cell migration|hexose metabolic process|response to hypoxia|regulation of nitric-oxide synthase activity|response to interleukin-1|regulation of epithelial cell proliferation|epithelial cell proliferation|regulatory region nucleic acid binding|axon cargo transport|transcription regulatory region DNA binding|regulation of carbohydrate metabolic process|positive regulation of…	GO:0030335|GO:0019318|GO:0001666|GO:0050999|GO:0070555|GO:0050678|GO:0050673|GO:0001067|GO:0008088|GO:0044212|GO:0006109|GO:0030949|GO:0036293|GO:0048010|GO:0044262|GO:0005996|GO:0010574|GO:0001935|GO:0032768|GO:0006007|GO:0010906|GO:2000147|GO:0016052|GO:0019320|GO:0010676|GO:0032770|GO:0006954|GO:0032722|GO:0032642|GO:0044724|GO:0001936|GO:0007018|GO:0044275|GO:0000975|GO:0030947|GO:0032602|GO:…	443.15	2.95549	-67	0.00171527	104	0.333333	0.0565171	ENSG00000100644	ENSP00000451696	3091	HIF1A	-0.370692	Cluster 6	Clustered	7.10606	H__sapiens__1_-703343	query	HIF1A	2.23333	NM_181054	NP_851397	0.690257	FALSE	H__sapiens__1_-703343	6178	PASD8	Q16665
579	enzyme inhibitor activity	GO:0004857	475.824	3.99037	-61	0.0017331	92	0.5	0.0625303	ENSG00000164111	ENSP00000427135	308	ANXA5	-0.325203	Cluster 6	Clustered	5.9651	H__sapiens__1_-712246	query	ANXA5	2.25152	NM_001154	NP_001145	0.72238	FALSE	H__sapiens__1_-712246	7378	ENX2	P08758
581	acetyl-CoA biosynthetic process|carboxylic acid catabolic process|regulation of coenzyme metabolic process|aspartate family amino acid catabolic process|regulation of acyl-CoA biosynthetic process|acyl-CoA biosynthetic process|acetyl-CoA biosynthetic process from pyruvate|regulation of fatty acid metabolic process|mitochondrial matrix|cellular respiration|alpha-amino acid catabolic process|pyruva…	GO:0006085|GO:0046395|GO:0051196|GO:0009068|GO:0050812|GO:0071616|GO:0006086|GO:0019217|GO:0005759|GO:0045333|GO:1901606|GO:0006090|GO:0006099|GO:1901605|GO:0010510|GO:0035384|GO:0044282|GO:0006084|GO:0015980|GO:0019216|GO:0051193|GO:0016054|GO:0009060|GO:0009063	590.745	2.09857	-38	0.00180505	156	0.5	0.085007	ENSG00000091140	ENSP00000417016	1738	DLD	-0.377924	Cluster 2	Clustered	17.7382	H__sapiens__1_-702894	query	DLD	2.32121	NM_001289752	NP_001276681	0.685282	FALSE	H__sapiens__1_-702894	9142	LAD	P09622
589	cellular metal ion homeostasis|positive regulation of protein serine/threonine kinase activity|negative regulation of steroid biosynthetic process|sensory perception|behavior|regulation of blood pressure|regulation of steroid biosynthetic process|neuronal cell body|peptide metabolic process|locomotory behavior|cell body|multicellular organism growth|regulation of neuron death|transition metal ion…	GO:0006875|GO:0071902|GO:0010894|GO:0007600|GO:0007610|GO:0008217|GO:0050810|GO:0043025|GO:0006518|GO:0007626|GO:0044297|GO:0035264|GO:1901214|GO:0055076|GO:0000303|GO:0008631|GO:0042493|GO:0006887|GO:0042110|GO:0042542|GO:0043005|GO:0003012|GO:0008088|GO:0051241|GO:0008015|GO:0010035|GO:0002521|GO:0040008|GO:0045471|GO:0055065|GO:1901617|GO:0043405|GO:0040014|GO:0043406|GO:0051087|GO:0016209|GO:…	673.617	2.72366	-33	0.00182149	143	0.5	0.0909849	ENSG00000142168	ENSP00000374645	6647	SOD1	-0.385984	Cluster 4	Clustered	12.9304	H__sapiens__1_-709197	query	SOD1	2.33636	NM_000454	NP_000445	0.679781	FALSE	H__sapiens__1_-709197	11450	IPOA	P00441
592	negative regulation of protein serine/threonine kinase activity|protein phosphatase regulator activity|protein phosphatase type 2A regulator activity|peptidyl-tyrosine modification|negative regulation of phosphorylation|regulation of cell adhesion|protein phosphatase type 2A complex|phosphatase regulator activity|cellular response to fibroblast growth factor stimulus|protein dephosphorylation|neg…	GO:0071901|GO:0019888|GO:0008601|GO:0018212|GO:0042326|GO:0030155|GO:0000159|GO:0019208|GO:0044344|GO:0006470|GO:0043407|GO:0033673|GO:0040008|GO:0008287|GO:0008543|GO:0043405|GO:0071774|GO:0051348|GO:0010563|GO:0046425|GO:0003823|GO:0043409|GO:0018108|GO:0007259|GO:0050730|GO:0019932|GO:0045936|GO:0000086|GO:0006469|GO:0001933|GO:0044839|GO:0071900|GO:1902532	417.53	2.45127	-48	0.00177305	122	0.333333	0.0821172	ENSG00000105568	ENSP00000485914	5518	PPP2R1A	-0.38896	Cluster 4	Clustered	12.0656	H__sapiens__1_-704115	query	PPP2R1A	2.29091	NM_014225	NP_055040	0.677761	FALSE	H__sapiens__1_-704115	8372	PR65A	P30153
595	nuclear import|negative regulation of protein transport|protein localization to nucleus|regulation of protein catabolic process|positive regulation of intracellular transport|regulation of protein import into nucleus|exocytosis|positive regulation of protein import into nucleus|regulation of intracellular transport|platelet degranulation|single-organism nuclear import|negative regulation of catab…	GO:0051170|GO:0051224|GO:0034504|GO:0042176|GO:0032388|GO:0042306|GO:0006887|GO:0042307|GO:0032386|GO:0002576|GO:1902593|GO:0009895|GO:0051051|GO:0007187|GO:0031647|GO:0051223|GO:1900180|GO:0006606|GO:0046822|GO:0033157|GO:0007212|GO:0006913|GO:0007193|GO:0007188|GO:0042177|GO:0046824|GO:0030168|GO:0007067|GO:0017038|GO:0070201|GO:0090316|GO:0051235|GO:0043122|GO:0051169|GO:0051222	427.598	3.05029	-73	0.00169779	93	0.5	0.0513007	ENSG00000196924	ENSP00000480593	2316	FLNA	-0.397682	Cluster 7	Clustered	4.92143	H__sapiens__1_-718283	query	FLNA	2.21515	NM_001456	NP_001447	0.671876	FALSE	H__sapiens__1_-718283	6122	OPD2	P21333
599	establishment of protein localization to mitochondrion|regulation of nitric-oxide synthase activity|intrinsic apoptotic signaling pathway in response to oxidative stress|peptidyl-serine modification|regulation of mitochondrial membrane permeability involved in apoptotic process|negative regulation of signal transduction in absence of ligand|epithelial cell proliferation|nitric oxide biosynthetic …	GO:0072655|GO:0050999|GO:0008631|GO:0018209|GO:1902108|GO:1901099|GO:0050673|GO:0006809|GO:0046209|GO:0034765|GO:0015909|GO:0006109|GO:0050995|GO:0033673|GO:0044262|GO:0008543|GO:0051348|GO:0016054|GO:0001935|GO:0090068|GO:0010822|GO:2000147|GO:1901653|GO:0006869|GO:0006913|GO:0015849|GO:0018105|GO:0010676|GO:1900407|GO:0050767|GO:0030168|GO:0034762|GO:1902686|GO:0090150|GO:0051091|GO:0001933|GO:…	468.846	2.71159	-53	0.00175747	121	0.5	0.0747666	ENSG00000142208	ENSP00000481526	207	AKT1	-0.434183	Cluster 5	Clustered	8.33025	H__sapiens__1_-709207	query	AKT1	2.27576	NM_005163	NP_005154	0.647793	FALSE	H__sapiens__1_-709207	8068	RAC	P31749
602	cellular metal ion homeostasis|protein phosphatase regulator activity|regulation of nitric-oxide synthase activity|regulation of calcium ion transmembrane transporter activity|regulation of phospholipase C activity|nitric oxide metabolic process|regulation of ion transmembrane transport|muscle system process|regulation of ion transmembrane transporter activity|divalent inorganic cation homeostasi…	GO:0006875|GO:0019888|GO:0050999|GO:1901019|GO:1900274|GO:0046209|GO:0034765|GO:0003012|GO:0032412|GO:0072507|GO:0010522|GO:0071482|GO:0044262|GO:0055065|GO:0008543|GO:0010959|GO:0032409|GO:0051302|GO:0016052|GO:0051480|GO:0044057|GO:0030168|GO:0034762|GO:0072503|GO:1902495|GO:0044275|GO:0032411|GO:0030003|GO:0021536|GO:0009187|GO:0006006|GO:0060402|GO:0006816|GO:0019208|GO:0044344|GO:0008016|GO:…	525.783	3.12852	-60	0.00173611	111	0.5	0.0659831	ENSG00000198668	ENSP00000486402	801	CALM1	-0.463653	Cluster 3	Clustered	10.8992	H__sapiens__1_-718834	query	CALM1	2.25455	NM_006888	NP_008819	0.628982	FALSE	H__sapiens__1_-718834	8398	DD132
614	nuclear import|nucleocytoplasmic transport|nuclear transport	GO:0051170|GO:0006913|GO:0051169	262.319	3.40494	-86	0.00165837	75	0.333333	0.052528	ENSG00000135486	ENSP00000449913	3178	HNRNPA1	-0.534582	Cluster 4	Clustered	14.2739	H__sapiens__1_-708082	query	HNRNPA1	2.17273	NM_031157	NP_112420	0.585914	FALSE	H__sapiens__1_-708082	4356	HNRPA1	P09651
616	mitochondrial membrane organization|regulation of protein insertion into mitochondrial membrane involved in apoptotic signaling pathway|protein insertion into mitochondrial membrane involved in apoptotic signaling pathway|protein insertion into mitochondrial membrane|regulation of mitochondrial membrane permeability|establishment of protein localization to mitochondrion|positive regulation of mit…	GO:0007006|GO:1900739|GO:0001844|GO:0051204|GO:0046902|GO:0072655|GO:1902110|GO:1902108|GO:0008637|GO:0032386|GO:0012506|GO:0010821|GO:0010822|GO:0097193|GO:0019901|GO:0035794|GO:0030659|GO:0007005|GO:0097345|GO:0030168|GO:1902686|GO:0090150|GO:0070201|GO:1901028|GO:1900740|GO:2001233|GO:0010638|GO:0051205|GO:0072562	913.619	2.01321	-12	0.00189394	201	0.5	0.112496	ENSG00000164924	ENSP00000430219	7534	YWHAZ	-0.590326	Cluster 4	Clustered	12.531	H__sapiens__1_-712474	query	YWHAZ	2.4	NM_145690	NP_663723	0.554146	FALSE	H__sapiens__1_-712474	16270	YWHAD	P63104
622	response to lipid|regulation of nitric-oxide synthase activity|regulation of protein catabolic process|regulation of phospholipase C activity|epithelial cell proliferation|nitric oxide biosynthetic process|nitric oxide metabolic process|response to steroid hormone|fibroblast growth factor receptor signaling pathway|positive regulation of MAP kinase activity|positive regulation of cell cycle proce…	GO:0033993|GO:0050999|GO:0042176|GO:1900274|GO:0050673|GO:0006809|GO:0046209|GO:0048545|GO:0008543|GO:0043406|GO:0090068|GO:0033157|GO:2000147|GO:0006913|GO:0007611|GO:0030659|GO:0043410|GO:0046824|GO:0043491|GO:0090150|GO:0090316|GO:0097305|GO:0051170|GO:0070372|GO:0034504|GO:0042306|GO:0044344|GO:0080135|GO:0038095|GO:0070371|GO:1901989|GO:0045429|GO:0009895|GO:0071774|GO:0009314|GO:0071396|GO:…	1025.01	2.58432	-10	0.00190114	180	0.5	0.104659	ENSG00000146648	ENSP00000415559	1956	EGFR	-0.695789	Cluster 3	Clustered	9.93895	H__sapiens__1_-709861	query	EGFR	2.40606	NM_201284	NP_958441	0.498681	FALSE	H__sapiens__1_-709861	15884	ERBB1	P00533
626	mitochondrial membrane organization|regulation of protein insertion into mitochondrial membrane involved in apoptotic signaling pathway|protein insertion into mitochondrial membrane involved in apoptotic signaling pathway|protein insertion into mitochondrial membrane|regulation of mitochondrial membrane permeability|establishment of protein localization to mitochondrion|positive regulation of mit…	GO:0007006|GO:1900739|GO:0001844|GO:0051204|GO:0046902|GO:0072655|GO:1902110|GO:1902108|GO:0021539|GO:0008637|GO:0032386|GO:0012506|GO:0010821|GO:0010822|GO:0097193|GO:0030900|GO:0035794|GO:0030659|GO:0007005|GO:0097345|GO:1902686|GO:0090150|GO:0070201|GO:1901028|GO:1900740|GO:2001233|GO:0010638|GO:0021536|GO:0021762|GO:0007420|GO:0051205	481.644	2.69415	-47	0.0017762	124	0.5	0.0835337	ENSG00000134308	ENSP00000398990	10971	YWHAQ	-3.39005	Cluster 4	Clustered	12.0553	H__sapiens__1_-707865	result		2.29394	NM_006826	NP_006817	0.0337071	FALSE	H__sapiens__1_-707865	8652	14-3-3	P27348
627	positive regulation of protein serine/threonine kinase activity|positive regulation of cell migration|response to lipid|behavior|positive regulation of epidermal growth factor receptor signaling pathway|response to hypoxia|membrane protein proteolysis|positive regulation of response to external stimulus|cytokine receptor binding|regulation of protein tyrosine kinase activity|response to drug|T ce…	GO:0071902|GO:0030335|GO:0033993|GO:0007610|GO:0045742|GO:0001666|GO:0033619|GO:0032103|GO:0005126|GO:0061097|GO:0042493|GO:0042110|GO:0032496|GO:0002443|GO:0051241|GO:0050731|GO:0036293|GO:0002521|GO:0070851|GO:0040008|GO:0016324|GO:0007176|GO:0098590|GO:0033028|GO:0090068|GO:1900087|GO:2000147|GO:1901653|GO:0032637|GO:0007346|GO:0071375|GO:1901186|GO:0071887|GO:0007259|GO:0030165|GO:0002237|GO:…	43.4185	2.69979	-116	0.00157978	38	0.333333	0.0268246	ENSG00000151694	ENSP00000480552	6868	ADAM17	-0.205948		Unclustered	3.55556	H__sapiens__1_-710440	query	ADAM17	2.08182	NM_003183	NP_003174	0.813876	FALSE	H__sapiens__1_-710440	842	TACE	P78536
630	monosaccharide biosynthetic process|hexose metabolic process|glucose metabolic process|gluconeogenesis|carbohydrate biosynthetic process|monosaccharide metabolic process|hexose biosynthetic process	GO:0046364|GO:0019318|GO:0006006|GO:0006094|GO:0016051|GO:0005996|GO:0019319	388.408	2.59025	-54	0.00175439	113	0.333333	0.0756609	ENSG00000014641	ENSP00000446395	4190	MDH1	-0.287674	Cluster 4	Clustered	13.8371	H__sapiens__1_-701325	query	MDH1	2.27273	NM_005917	NP_005908	0.750006	FALSE	H__sapiens__1_-701325	6524		P40925
633	toll-like receptor signaling pathway|mitochondrial membrane organization|regulation of mitochondrial membrane permeability|stress-activated protein kinase signaling cascade|positive regulation of defense response|toll-like receptor 5 signaling pathway|positive regulation of mitochondrial membrane permeability involved in apoptotic process|regulation of mitochondrial membrane permeability involved…	GO:0002224|GO:0007006|GO:0046902|GO:0031098|GO:0031349|GO:0034146|GO:1902110|GO:1902108|GO:0016570|GO:0034162|GO:0001067|GO:0002218|GO:0002756|GO:0002221|GO:0044212|GO:0008637|GO:0051403|GO:0016569|GO:0035666|GO:0034166|GO:0034134|GO:0038124|GO:0045089|GO:0019901|GO:0038123|GO:0007346|GO:0006839|GO:0034142|GO:0035794|GO:0002755|GO:0007005|GO:1902686|GO:0051091|GO:0034138|GO:0045088|GO:0000975|GO:…	583.172	3.92005	-56	0.00174825	106	0.5	0.0706471	ENSG00000115966	ENSP00000437952	1386	ATF2	-3.43815	Cluster 5	Clustered	8.12261	H__sapiens__1_-705493	result		2.26667	NM_001880	NP_001871	0.0321242	FALSE	H__sapiens__1_-705493	10062	TREB7	P15336
635	regulation of peptide hormone secretion|carboxylic acid transport|regulation of insulin secretion|peptide hormone secretion|regulation of hormone levels|peptide secretion|acid secretion|peptide transport|neuron projection|neuron part|regulation of hormone secretion|regulation of neurotransmitter levels|glutamate secretion|hormone secretion|energy reserve metabolic process|insulin secretion|regula…	GO:0090276|GO:0046942|GO:0050796|GO:0030072|GO:0010817|GO:0002790|GO:0046717|GO:0015833|GO:0043005|GO:0097458|GO:0046883|GO:0001505|GO:0014047|GO:0046879|GO:0006112|GO:0030073|GO:0090087|GO:0009914|GO:0015849|GO:0006836|GO:0042886|GO:0023061|GO:0007269|GO:0015980|GO:0002791	177.862	1.90582	-90	0.00165017	81	0.333333	0.0410975	ENSG00000106089	ENSP00000378585	6804	STX1A	-3.56441	Cluster 3	Clustered	11.3204	H__sapiens__1_-704238	result		2.16364	NM_004603	NP_004594	0.0283138	FALSE	H__sapiens__1_-704238	3032	STX1	Q16623
640	'de novo' protein folding|protein folding|microtubule|'de novo' posttranslational protein folding	GO:0006458|GO:0006457|GO:0005874|GO:0051084	761.309	3.44608	-45	0.00178253	129	0.333333	0.0782201	ENSG00000137267	ENSP00000369703	7280	TUBB2A	-3.58331	Cluster 3	Clustered	9.64336	H__sapiens__1_-708430	result		2.3	NM_001069	NP_001060	0.0277835	FALSE	H__sapiens__1_-708430	12142	TUBB2	Q13885
647	tricarboxylic acid metabolic process|mitochondrial matrix|energy derivation by oxidation of organic compounds|cellular respiration|tricarboxylic acid cycle|aerobic respiration	GO:0072350|GO:0005759|GO:0015980|GO:0045333|GO:0006099|GO:0009060	282.341	2.97473	-75	0.00169205	87	0.333333	0.0604995	ENSG00000067829	ENSP00000482665	3421	IDH3G	-3.59045	Cluster 3	Clustered	11.148	H__sapiens__1_-701996	result		2.20909	NM_174869	NP_777358	0.0275858	FALSE	H__sapiens__1_-701996	4640		P51553
648	ferric iron transport|transferrin transport|guanyl ribonucleotide binding|synaptic vesicle localization|receptor metabolic process|antigen processing and presentation of exogenous peptide antigen via MHC class II|regulation of nitric-oxide synthase activity|establishment of vesicle localization|guanyl nucleotide binding|vesicle localization|GTPase activity|synaptic vesicle transport|nitric oxide …	GO:0015682|GO:0033572|GO:0032561|GO:0097479|GO:0043112|GO:0019886|GO:0050999|GO:0051650|GO:0019001|GO:0051648|GO:0003924|GO:0048489|GO:0046209|GO:0006898|GO:0030139|GO:0051341|GO:0000041|GO:0072512|GO:0006826|GO:0012506|GO:0044456|GO:0045202|GO:0032768|GO:0051656|GO:0031623|GO:0097480|GO:0005874|GO:0030659|GO:0030666|GO:0000086|GO:0044839|GO:0006892|GO:0048193|GO:0051640|GO:0005525	184.303	3.82758	-93	0.00164204	58	0.333333	0.041574	ENSG00000079805	ENSP00000468734	1785	DNM2	-0.256235	Cluster 6	Clustered	6.99194	H__sapiens__1_-702452	query	DNM2	2.15455	NM_004945	NP_004936	0.77396	FALSE	H__sapiens__1_-702452	2984	DYNII	P50570
650	immune response-activating cell surface receptor signaling pathway|mitochondrial membrane organization|immune response-regulating cell surface receptor signaling pathway involved in phagocytosis|establishment of protein localization to mitochondrion|regulation of nitric-oxide synthase activity|nitric oxide biosynthetic process|nitric oxide metabolic process|ribonucleoside monophosphate metabolic …	GO:0002429|GO:0007006|GO:0002433|GO:0072655|GO:0050999|GO:0006809|GO:0046209|GO:0009161|GO:0031983|GO:0009128|GO:0051131|GO:0030139|GO:0060205|GO:0051341|GO:0009125|GO:0045429|GO:0009126|GO:0006200|GO:0009169|GO:0038094|GO:0003823|GO:0045428|GO:0032768|GO:0035966|GO:0046034|GO:0016887|GO:0006457|GO:0002768|GO:0023026|GO:0009167|GO:0038096|GO:0006839|GO:0007005|GO:0006909|GO:0023023|GO:0002431|GO:…	631.565	2.07366	-29	0.00183486	167	0.5	0.0975755	ENSG00000080824	ENSP00000489370	3320	HSP90AA1	-3.67096	Cluster 2	Clustered	15.2698	H__sapiens__1_-702486	result		2.34848	NM_005348	NP_005339	0.025452	FALSE	H__sapiens__1_-702486	11082	HSPCA	P07900
664	nucleoside triphosphate biosynthetic process|purine nucleoside triphosphate biosynthetic process|oxidative phosphorylation|mitochondrial ATP synthesis coupled proton transport|respiratory electron transport chain|purine nucleoside biosynthetic process|organelle inner membrane|energy coupled proton transport, down electrochemical gradient|ATP synthesis coupled proton transport|mitochondrial inner …	GO:0009142|GO:0009145|GO:0006119|GO:0042776|GO:0022904|GO:0042451|GO:0019866|GO:0015985|GO:0015986|GO:0005743|GO:0046129|GO:0005759|GO:0015992|GO:0045333|GO:0015672|GO:0042455|GO:0016469|GO:0031966|GO:0009168|GO:0045259|GO:0009201|GO:0046390|GO:0006754|GO:0009161|GO:0009128|GO:0009127|GO:0009125|GO:0009126|GO:0044455|GO:0006200|GO:0009169|GO:0009206|GO:0046034|GO:0016887|GO:0009152|GO:0022900|GO:…	446.394	2.26626	-47	0.0017762	132	0.333333	0.0843931	ENSG00000165629	ENSP00000349142	509	ATP5C1	-3.69233	Cluster 2	Clustered	14.9921	H__sapiens__1_-712638	result		2.29394	NM_005174	NP_005165	0.0249138	FALSE	H__sapiens__1_-712638	8254	ATP5CL1	P36542
677	positive regulation of epithelial cell proliferation|guanyl ribonucleotide binding|regulation of binding|cell projection membrane|guanyl nucleotide binding|positive regulation of DNA binding|ruffle membrane|regulation of epithelial cell proliferation|epithelial cell proliferation|GTP binding	GO:0050679|GO:0032561|GO:0051098|GO:0031253|GO:0019001|GO:0043388|GO:0032587|GO:0050678|GO:0050673|GO:0005525	618.214	3.11509	-41	0.00179533	125	0.5	0.0860241	ENSG00000239672	ENSP00000435498	4830	NME1	-3.70807	Cluster 2	Clustered	17.0363	H__sapiens__1_-738087	result		2.31212	NM_198175	NP_937818	0.0245248	FALSE	H__sapiens__1_-738087	10024	NM23-H1	P15531
680	monosaccharide biosynthetic process|hexose metabolic process|glucose metabolic process|mitochondrial matrix|dicarboxylic acid metabolic process|cellular respiration|tricarboxylic acid cycle|gluconeogenesis|carbohydrate biosynthetic process|energy derivation by oxidation of organic compounds|monosaccharide metabolic process|hexose biosynthetic process|aerobic respiration	GO:0046364|GO:0019318|GO:0006006|GO:0005759|GO:0043648|GO:0045333|GO:0006099|GO:0006094|GO:0016051|GO:0015980|GO:0005996|GO:0019319|GO:0009060	179.595	1.6659	-70	0.00170648	103	0.333333	0.06804	ENSG00000146701	ENSP00000475583	4191	MDH2	-3.72015	Cluster 1	Clustered	18.4441	H__sapiens__1_-709869	result		2.22424	NM_005918	NP_005909	0.0242304	FALSE	H__sapiens__1_-709869	3690		P40926
682	cellular response to fibroblast growth factor stimulus|neurotrophin signaling pathway|immune response-regulating cell surface receptor signaling pathway|epidermal growth factor receptor signaling pathway|Fc-epsilon receptor signaling pathway|fibroblast growth factor receptor signaling pathway|response to fibroblast growth factor|ERBB signaling pathway|phosphatidylinositol-mediated signaling|neuro…	GO:0044344|GO:0038179|GO:0002768|GO:0007173|GO:0038095|GO:0008543|GO:0071774|GO:0038127|GO:0048015|GO:0048011|GO:0048017|GO:0038093	334.331	4.68116	-80	0.00167785	70	0.5	0.050892	ENSG00000175634	ENSP00000473485	6199	RPS6KB2	-3.74233	Cluster 3	Clustered	10.2414	H__sapiens__1_-714932	result		2.19394	NM_003952	NP_003943	0.0236989	FALSE	H__sapiens__1_-714932	6126	STK14B	Q9UBS0
683			108.077	2.42624	-88	0.00165563	65	0.333333	0.0521801	ENSG00000077549	ENSP00000401010	832	CAPZB	-0.256083	Cluster 5	Clustered	8.42183	H__sapiens__1_-702367	query	CAPZB	2.1697	NM_004930	NP_004921	0.774078	FALSE	H__sapiens__1_-702367	2292		P47756
686	proton-transporting ATP synthase complex|proton-transporting two-sector ATPase complex|mitochondrial proton-transporting ATP synthase complex|mitochondrial membrane part|mitochondrial membrane|organelle inner membrane|mitochondrial inner membrane	GO:0045259|GO:0016469|GO:0005753|GO:0044455|GO:0031966|GO:0019866|GO:0005743	296.308	2.24866	-57	0.0017452	110	0.333333	0.0773916	ENSG00000154518	ENSP00000387317	518	ATP5G3	-3.76678	Cluster 1	Clustered	19.9574	H__sapiens__1_-710771	result		2.26364	NM_001689	NP_001680	0.0231265	FALSE	H__sapiens__1_-710771	5662		P48201
697	carboxylic acid catabolic process|aspartate family amino acid catabolic process|oxidoreductase activity, acting on the aldehyde or oxo group of donors|mitochondrial matrix|cellular respiration|alpha-amino acid catabolic process|tricarboxylic acid cycle|alpha-amino acid metabolic process|small molecule catabolic process|energy derivation by oxidation of organic compounds|mitochondrial membrane|org…	GO:0046395|GO:0009068|GO:0016903|GO:0005759|GO:0045333|GO:1901606|GO:0006099|GO:1901605|GO:0044282|GO:0015980|GO:0031966|GO:0016054|GO:0009060|GO:0009063	411.996	2.65054	-50	0.00176678	118	0.5	0.0792678	ENSG00000105953	ENSP00000486854	4967	OGDH	-3.76982	Cluster 4	Clustered	12.1306	H__sapiens__1_-704201	result		2.28485	NM_002541	NP_002532	0.0230563	FALSE	H__sapiens__1_-704201	7550	E1k	Q02218
699	'de novo' protein folding|protein folding|microtubule|'de novo' posttranslational protein folding	GO:0006458|GO:0006457|GO:0005874|GO:0051084	436.776	1.87112	-48	0.00177305	144	0.5	0.0821417	ENSG00000115484	ENSP00000443061	10575	CCT4	-3.77175	Cluster 2	Clustered	15.9282	H__sapiens__1_-705419	result		2.29091	NM_006430	NP_006421	0.0230117	FALSE	H__sapiens__1_-705419	7548	Cctd	P50991
702	hexose metabolic process|glucose metabolic process|glucose catabolic process|carbohydrate catabolic process|hexose catabolic process|carbohydrate phosphorylation|carbohydrate kinase activity|glycolysis|monosaccharide catabolic process|single-organism carbohydrate catabolic process|apical plasma membrane|cellular carbohydrate metabolic process|apical part of cell|muscle cell cellular homeostasis|p…	GO:0019318|GO:0006006|GO:0006007|GO:0016052|GO:0019320|GO:0046835|GO:0019200|GO:0006096|GO:0046365|GO:0044724|GO:0016324|GO:0044262|GO:0045177|GO:0046716|GO:0098590|GO:0005996	434.646	3.03454	-49	0.00176991	113	0.333333	0.0829586	ENSG00000152556	ENSP00000486196	5213	PFKM	-3.77908	Cluster 2	Clustered	16.6788	H__sapiens__1_-710549	result		2.28788	NM_001166688	NP_001160160	0.0228437	FALSE	H__sapiens__1_-710549	7576	PPP1R122	P08237
707	'de novo' protein folding|protein folding|microtubule|'de novo' posttranslational protein folding	GO:0006458|GO:0006457|GO:0005874|GO:0051084	544.211	2.04007	-30	0.0018315	155	0.333333	0.0974302	ENSG00000135624	ENSP00000487267	10574	CCT7	-3.78058	Cluster 1	Clustered	18.449	H__sapiens__1_-708105	result		2.34545	NM_006429	NP_006420	0.0228094	FALSE	H__sapiens__1_-708105	11016	Nip7-1	Q99832
711	positive regulation of cell migration|exocytosis|subthalamus development|unfolded protein binding|ribonucleoside monophosphate metabolic process|purine nucleoside monophosphate catabolic process|platelet degranulation|positive regulation of cellular component movement|nucleoside monophosphate catabolic process|purine nucleoside monophosphate metabolic process|ATP catabolic process|purine ribonucl…	GO:0030335|GO:0006887|GO:0021539|GO:0051082|GO:0009161|GO:0009128|GO:0002576|GO:0051272|GO:0009125|GO:0009126|GO:0006200|GO:0009169|GO:0035966|GO:0051087|GO:0046034|GO:0016887|GO:2000147|GO:0006457|GO:0009167|GO:0030900|GO:0030168|GO:0009158|GO:0009123|GO:0051235|GO:0040017|GO:0021536|GO:0021762|GO:0007420|GO:0006986	341.43	2.52745	-60	0.00173611	108	0.5	0.0713941	ENSG00000044574	ENSP00000324173	3309	HSPA5	-3.78092	Cluster 3	Clustered	9.58333	H__sapiens__1_-701581	result		2.25455	NM_005347	NP_005338	0.0228017	FALSE	H__sapiens__1_-701581	6172	GRP78	P11021
716	coated vesicle membrane|coated vesicle|clathrin-coated vesicle|clathrin-coated vesicle membrane|cytoplasmic vesicle membrane|vesicle membrane|synapse part|synapse	GO:0030662|GO:0030135|GO:0030136|GO:0030665|GO:0030659|GO:0012506|GO:0044456|GO:0045202	56.2938	3.04674	-113	0.00158983	38	0.333333	0.0273265	ENSG00000091664	ENSP00000263160	57084	SLC17A6	-0.135506	Cluster 5	Seed	9.15789	H__sapiens__1_-702916	query	SLC17A6	2.09394	NM_020346	NP_065079	0.873274	FALSE	H__sapiens__1_-702916	998	VGLUT2	Q9P2U8
717			14.818	2.29679	-139	0.00152672	23	0.333333	0.0153658	ENSG00000125814	ENSP00000482826	63908	NAPB	-0.0871605		Unclustered	6.97436	H__sapiens__1_-706702	query	NAPB	2.01515	NM_022080	NP_071363	0.91653	FALSE	H__sapiens__1_-706702	254	SNAPB	Q9H115
719	axon|establishment of organelle localization|neuron projection terminus|synaptic vesicle localization|dendrite development|establishment of synaptic vesicle localization|synaptic vesicle endocytosis|establishment of vesicle localization|vesicle localization|regulation of neuron projection development|synaptic vesicle transport|regulation of neurogenesis|neuron projection|perinuclear region of cyt…	GO:0030424|GO:0051656|GO:0044306|GO:0097479|GO:0016358|GO:0097480|GO:0048488|GO:0051650|GO:0051648|GO:0010975|GO:0048489|GO:0050767|GO:0043005|GO:0048471|GO:0097458|GO:0051960|GO:0090150|GO:0031253|GO:0032587|GO:0051640|GO:0045202	62.4981	3.9527	-118	0.00157729	35	0.333333	0.0270951	ENSG00000124507	ENSP00000484060	29993	PACSIN1	-0.0950411		Unclustered	4.76087	H__sapiens__1_-706520	query	PACSIN1	2.07879	NM_020804	NP_065855	0.909336	FALSE	H__sapiens__1_-706520	1124	SDPI	Q9BY11
721	negative regulation of phosphate metabolic process|protein phosphatase regulator activity|enzyme inhibitor activity|negative regulation of protein kinase activity|protein kinase regulator activity|negative regulation of protein phosphorylation|negative regulation of phosphorylation|kinase regulator activity|negative regulation of kinase activity|phosphatase regulator activity|negative regulation …	GO:0045936|GO:0019888|GO:0004857|GO:0006469|GO:0019887|GO:0001933|GO:0042326|GO:0019207|GO:0033673|GO:0019208|GO:0051348|GO:0010563	32.1392	3.3433	-136	0.00152439	26	0.333333	0.0138765	ENSG00000131771	ENSP00000462841	84152	PPP1R1B	-0.146686		Unclustered	2.96703	H__sapiens__1_-707479	query	PPP1R1B	2.01212	NM_181505	NP_852606	0.863565	FALSE	H__sapiens__1_-707479	420	FLJ20940	Q9UD71
723	sensory perception|positive regulation of sequence-specific DNA binding transcription factor activity|brain development	GO:0007600|GO:0051091|GO:0007420	33.733	6.10131	-154	0.00147493	17	0.333333	0.00851702	ENSG00000043355	ENSP00000365514	7546	ZIC2	-0.156828		Unclustered	1.33333	H__sapiens__1_-701571	query	ZIC2	1.94545	NM_007129	NP_009060	0.854851	FALSE	H__sapiens__1_-701571	310	HPE5	O95409
724	cellular response to xenobiotic stimulus|antioxidant activity|xenobiotic metabolic process|glutathione derivative biosynthetic process|response to xenobiotic stimulus|glutathione derivative metabolic process|monosaccharide metabolic process	GO:0071466|GO:0016209|GO:0006805|GO:1901687|GO:0009410|GO:1901685|GO:0005996	37.5299	5.70735	-148	0.00150602	20	0.333333	0.0147219	ENSG00000065621	ENSP00000390986	119391	GSTO2	-0.0463962	Cluster 6	Clustered	7	H__sapiens__1_-701917	query	GSTO2	1.98788	NM_183239	NP_899062	0.954664	FALSE	H__sapiens__1_-701917	502		Q9H4Y5
726	cellular response to xenobiotic stimulus|cellular amino acid biosynthetic process|xenobiotic metabolic process|glutathione derivative biosynthetic process|response to xenobiotic stimulus|peptide metabolic process|cellular modified amino acid metabolic process|cellular amide metabolic process|glutathione metabolic process|glutathione derivative metabolic process	GO:0071466|GO:0008652|GO:0006805|GO:1901687|GO:0009410|GO:0006518|GO:0006575|GO:0043603|GO:0006749|GO:1901685	149.726	5.59721	-105	0.00160772	41	0.333333	0.0306007	ENSG00000133313	ENSP00000482227	55748	CNDP2	-0.16347	Cluster 8	Clustered	4.23692	H__sapiens__1_-707730	query	CNDP2	2.11515	NM_018235	NP_060705	0.849192	FALSE	H__sapiens__1_-707730	2286	PEPA	Q96KP4
727	primary active transmembrane transporter activity|ATPase activity|active transmembrane transporter activity|ATPase activity, coupled to transmembrane movement of ions|inorganic cation transmembrane transporter activity|ATPase activity, coupled to transmembrane movement of substances|monovalent inorganic cation transport|P-P-bond-hydrolysis-driven transmembrane transporter activity|cation-transpor…	GO:0015399|GO:0016887|GO:0022804|GO:0042625|GO:0022890|GO:0042626|GO:0015672|GO:0015405|GO:0019829|GO:0043492|GO:1902495|GO:0046873|GO:0016820|GO:0045202	80.4921	3.74913	-111	0.0015949	42	0.333333	0.0315279	ENSG00000105409	ENSP00000489877	478	ATP1A3	-0.0680644	Cluster 6	Clustered	6.89474	H__sapiens__1_-704082	query	ATP1A3	2.1	NM_152296	NP_689509	0.9342	FALSE	H__sapiens__1_-704082	1656	DYT12	P13637
730	positive regulation of protein serine/threonine kinase activity|response to glucagon|activation of MAPK activity|cellular response to peptide|activation of protein kinase activity|response to peptide|cellular response to peptide hormone stimulus|response to peptide hormone|GTPase activity|positive regulation of MAPK cascade|cellular response to glucagon stimulus|regulation of protein serine/threo…	GO:0071902|GO:0033762|GO:0000187|GO:1901653|GO:0032147|GO:1901652|GO:0071375|GO:0043434|GO:0003924|GO:0043410|GO:0071377|GO:0071900|GO:0006112|GO:0015980|GO:0043405|GO:0043406	527.22	2.33139	-46	0.00177936	132	0.5	0.0713629	ENSG00000162188	ENSP00000294117	2785	GNG3	-0.180467	Cluster 4	Clustered	12.7329	H__sapiens__1_-711687	query	GNG3	2.29697	NM_012202	NP_036334	0.83488	FALSE	H__sapiens__1_-711687	8234		P63215
733			26.0839	3.15982	-137	0.00153139	25	0.333333	0.0164231	ENSG00000157851	ENSP00000481305	56896	DPYSL5	-0.0741133		Unclustered	3.54286	H__sapiens__1_-711141	query	DPYSL5	2.02121	NM_020134	NP_064519	0.928566	FALSE	H__sapiens__1_-711141	424	Ulip6	Q9BPU6
735			121.976	5.59793	-116	0.00158228	34	0.333333	0.0245434	ENSG00000002549	ENSP00000481000	51056	LAP3	-0.186131		Unclustered	3.05846	H__sapiens__1_-700997	query	LAP3	2.08485	NM_015907	NP_056991	0.830165	FALSE	H__sapiens__1_-700997	1946	PEPS	P28838
736			55.9604	3.38963	-121	0.00156986	34	0.333333	0.0232343	ENSG00000126945	ENSP00000361927	3188	HNRNPH2	-0.146381		Unclustered	4.26667	H__sapiens__1_-706860	query	HNRPH2	2.0697	NM_019597	NP_062543	0.863828	FALSE	H__sapiens__1_-706860	854	HNRPH2	P55795
740	gated channel activity|glutamate receptor signaling pathway|ion channel activity|channel activity|ionotropic glutamate receptor activity|extracellular ligand-gated ion channel activity|ion channel complex|ligand-gated channel activity|passive transmembrane transporter activity|substrate-specific channel activity|cytoplasmic vesicle membrane|ionotropic glutamate receptor complex|ligand-gated ion c…	GO:0022836|GO:0007215|GO:0005216|GO:0015267|GO:0004970|GO:0005230|GO:0034702|GO:0022834|GO:0022803|GO:0022838|GO:0030659|GO:0008328|GO:0015276|GO:0030666|GO:0008066|GO:0035235|GO:1902495|GO:0030139|GO:0012506|GO:0043235|GO:0032281	280.098	2.31544	-74	0.00169492	98	0.333333	0.0550802	ENSG00000125675	ENSP00000481875	2892	GRIA3	-0.195771	Cluster 4	Clustered	13.4318	H__sapiens__1_-706672	query	GRIA3	2.21212	NM_007325	NP_015564	0.822201	FALSE	H__sapiens__1_-706672	5586	MRX94	P42263
743	axon|neuron part|neuron projection	GO:0030424|GO:0097458|GO:0043005	56.6184	3.47505	-121	0.00156986	33	0.333333	0.0204227	ENSG00000104327	ENSP00000430281	793	CALB1	-0.198558	Cluster 8	Clustered	3.94667	H__sapiens__1_-703881	query	CALB1	2.0697	NM_004929	NP_004920	0.819912	FALSE	H__sapiens__1_-703881	826	CALB	P05937
745			40.0999	1.9319	-123	0.00156495	41	0.333333	0.0262529	ENSG00000283391	ENSP00000490893	1933	EEF1B2	-0.199411		Unclustered	5.65714	H__sapiens__1_-705328	query	EEF1B2	2.06364	NM_021121	NP_066944	0.819213	FALSE	H__sapiens__1_-705328	896		P24534
746	response to virus	GO:0009615	159.887	1.9909	-88	0.00165563	79	0.333333	0.049889	ENSG00000254772	ENSP00000331901	1937	EEF1G	-0.186002	Cluster 5	Clustered	8.66445	H__sapiens__1_-745330	query	EEF1G	2.1697	NM_001404	NP_001395	0.830272	FALSE	H__sapiens__1_-745330	2936	EF1G	P26641
748	regulation of protein secretion|regulation of protein transport|regulation of establishment of protein localization|protein folding|platelet degranulation|positive regulation of secretion|exocytosis|protein secretion|positive regulation of protein transport|platelet activation|isomerase activity|unfolded protein binding	GO:0050708|GO:0051223|GO:0070201|GO:0006457|GO:0002576|GO:0051047|GO:0006887|GO:0009306|GO:0051222|GO:0030168|GO:0016853|GO:0051082	176.987	2.98607	-82	0.00167224	74	0.333333	0.0592604	ENSG00000196262	ENSP00000479961	5478	PPIA	-0.200598	Cluster 4	Clustered	12.098	H__sapiens__1_-718063	query	PPIA	2.18788	NM_021130	NP_066953	0.818242	FALSE	H__sapiens__1_-718063	3364	CYPA	P62937
749	'de novo' protein folding|protein folding|microtubule|'de novo' posttranslational protein folding	GO:0006458|GO:0006457|GO:0005874|GO:0051084	199.539	1.87141	-79	0.00168067	99	0.5	0.0555946	ENSG00000163468	ENSP00000435026	7203	CCT3	-0.138741	Cluster 4	Clustered	12.3514	H__sapiens__1_-712011	query	CCT3	2.19697	NM_005998	NP_005989	0.870453	FALSE	H__sapiens__1_-712011	3714	TRIC5	P49368
755	gated channel activity|channel activity|ionotropic glutamate receptor activity|neuronal cell body|extracellular ligand-gated ion channel activity|ion channel complex|dendritic spine|substrate-specific channel activity|neuron spine|cell body|ionotropic glutamate receptor complex|ligand-gated ion channel activity|neuron projection|neuron part|ionotropic glutamate receptor signaling pathway|endocyti…	GO:0022836|GO:0015267|GO:0004970|GO:0043025|GO:0005230|GO:0034702|GO:0043197|GO:0022838|GO:0044309|GO:0044297|GO:0008328|GO:0015276|GO:0043005|GO:0097458|GO:0035235|GO:0030139|GO:0012506|GO:0014069|GO:0044456|GO:0032281|GO:0045202|GO:0007215|GO:0005216|GO:0022834|GO:0022803|GO:0030659|GO:0030666|GO:0030165|GO:0008066|GO:1902495|GO:0043235|GO:0030425	696.003	3.72647	-60	0.00173611	111	0.5	0.0623782	ENSG00000155511	ENSP00000428994	2890	GRIA1	-0.204528	Cluster 6	Seed	7.3039	H__sapiens__1_-710874	query	GRIA1	2.25455	NM_001258023	NP_001244952	0.815032	FALSE	H__sapiens__1_-710874	12442	GLURA	P42261
759	mitochondrial matrix|energy derivation by oxidation of organic compounds|cellular respiration|tricarboxylic acid cycle|aerobic respiration	GO:0005759|GO:0015980|GO:0045333|GO:0006099|GO:0009060	117.422	1.73551	-91	0.00164745	78	0.333333	0.0507945	ENSG00000163541	ENSP00000403884	8802	SUCLG1	-0.206125	Cluster 2	Clustered	15.9581	H__sapiens__1_-712042	query	SUCLG1	2.16061	NM_003849	NP_003840	0.813732	FALSE	H__sapiens__1_-712042	2268		P53597
761	response to glucagon|cellular response to peptide|response to peptide|cellular response to peptide hormone stimulus|energy reserve metabolic process|response to peptide hormone|energy derivation by oxidation of organic compounds|cellular response to glucagon stimulus	GO:0033762|GO:1901653|GO:1901652|GO:0071375|GO:0006112|GO:0043434|GO:0015980|GO:0071377	102.928	1.90833	-106	0.00160514	61	0.333333	0.0285221	ENSG00000127588	ENSP00000248150	51764	GNG13	-0.117319	Cluster 1	Clustered	22.3915	H__sapiens__1_-706925	query	GNG13	2.11212	NM_016541	NP_057625	0.889301	FALSE	H__sapiens__1_-706925	1922	h2-35	Q9P2W3
763	establishment of organelle localization|synaptic vesicle localization|establishment of synaptic vesicle localization|microtubule|neurotransmitter transport|establishment of vesicle localization|exocytosis|vesicle localization|synaptic vesicle transport|signal release|regulation of neurotransmitter levels|synaptic vesicle exocytosis|neurotransmitter secretion|organelle localization	GO:0051656|GO:0097479|GO:0097480|GO:0005874|GO:0006836|GO:0051650|GO:0006887|GO:0051648|GO:0048489|GO:0023061|GO:0001505|GO:0016079|GO:0007269|GO:0051640	48.4151	2.08354	-112	0.0015873	43	0.333333	0.0271742	ENSG00000101298	ENSP00000479696	9751	SNPH	-0.210136	Cluster 5	Clustered	8.97	H__sapiens__1_-703471	query	SNPH	2.09091	NM_014723	NP_055538	0.810474	FALSE	H__sapiens__1_-703471	898	bA314N13.5	O15079
765	cellular metal ion homeostasis|regulation of ion homeostasis|regulation of sequestering of calcium ion|regulation of ERK1 and ERK2 cascade|calcium ion transport into cytosol|calcium ion transport|drug binding|response to drug|regulation of phospholipase C activity|regulation of homeostatic process|positive regulation of lipase activity|calcium ion homeostasis|divalent inorganic cation homeostasis…	GO:0006875|GO:2000021|GO:0051282|GO:0070372|GO:0060402|GO:0006816|GO:0008144|GO:0042493|GO:1900274|GO:0032844|GO:0060193|GO:0055074|GO:0072507|GO:0004930|GO:0070371|GO:0010863|GO:0055065|GO:0006873|GO:0019216|GO:0051209|GO:0070374|GO:0010517|GO:0070838|GO:0072511|GO:0007204|GO:0045834|GO:0006874|GO:0060191|GO:0051480|GO:0046890|GO:0043410|GO:0048015|GO:0072503|GO:0010518|GO:0007202|GO:0051235|GO:…	338.296	3.18845	-69	0.0017094	93	0.333333	0.0552411	ENSG00000102468	ENSP00000482708	3356	HTR2A	-0.215463	Cluster 3	Clustered	11.1054	H__sapiens__1_-703656	query	HTR2A	2.22727	NM_001165947	NP_001159419	0.806168	FALSE	H__sapiens__1_-703656	5496	HTR2	P28223
769	immune response-activating cell surface receptor signaling pathway|immune response-regulating cell surface receptor signaling pathway involved in phagocytosis|immune response-regulating cell surface receptor signaling pathway|Fc-gamma receptor signaling pathway involved in phagocytosis|multicellular organismal homeostasis|phagocytosis|Fc-gamma receptor signaling pathway|Fc receptor mediated stimu…	GO:0002429|GO:0002433|GO:0002768|GO:0038096|GO:0048871|GO:0006909|GO:0038094|GO:0002431|GO:0038093|GO:0072562	72.2049	1.39293	-101	0.00162075	73	0.333333	0.0460355	ENSG00000184009	ENSP00000477968	71	ACTG1	-0.192785	Cluster 3	Clustered	10.1735	H__sapiens__1_-716647	query	ACTG1	2.1303	NM_001614	NP_001605	0.824659	FALSE	H__sapiens__1_-716647	1596	DFNA26	P63261
774	negative regulation of peptidase activity|enzyme inhibitor activity|reactive oxygen species metabolic process|regulation of cysteine-type endopeptidase activity involved in apoptotic process|response to oxidative stress|response to hydrogen peroxide|regulatory region nucleic acid binding|negative regulation of oxidoreductase activity|perinuclear region of cytoplasm|cellular response to reactive o…	GO:0010466|GO:0004857|GO:0072593|GO:0043281|GO:0006979|GO:0042542|GO:0001067|GO:0051354|GO:0048471|GO:0034614|GO:0044212|GO:0006739|GO:0010035|GO:0051341|GO:0052547|GO:0034599|GO:0043154|GO:0010951|GO:0016684|GO:0000302|GO:0016209|GO:2000116|GO:0048872|GO:2000117|GO:0005759|GO:0042743|GO:0048871|GO:0006954|GO:0052548|GO:0070301|GO:0000975|GO:0004601|GO:0042744	97.462	2.26999	-99	0.00162075	59	0.333333	0.0424539	ENSG00000126432	ENSP00000335363	25824	PRDX5	-0.171227	Cluster 4	Clustered	12.9205	H__sapiens__1_-706802	query	PRDX5	2.1303	NM_181652	NP_857635	0.84263	FALSE	H__sapiens__1_-706802	1876	SBBI10	P30044
778	regulation of I-kappaB kinase/NF-kappaB signaling	GO:0043122	17.3584	5.87318	-162	0.00146413	13	0.333333	0.00858068	ENSG00000132024	ENSP00000467526	54862	CC2D1A	-0.104127		Unclustered	4.02778	H__sapiens__1_-707520	query	CC2D1A	1.9303	NM_017721	NP_060191	0.901111	FALSE	H__sapiens__1_-707520	232	MRT3	Q6P1N0
783	epithelial cell differentiation|nucleoside triphosphate biosynthetic process|positive regulation of epithelial cell proliferation|nucleoside phosphate biosynthetic process|regulation of epithelial cell proliferation|epithelial cell proliferation	GO:0030855|GO:0009142|GO:0050679|GO:1901293|GO:0050678|GO:0050673	146.33	2.48952	-88	0.00165289	73	0.333333	0.0517624	ENSG00000243678	ENSP00000426976	4831	NME2	-0.150511	Cluster 3	Clustered	10.3619	H__sapiens__1_-739809	query	NDPKB	2.16667	NM_002512	NP_002503	0.860269	FALSE	H__sapiens__1_-739809	2656	NM23-H2	P22392
790	gated channel activity|glutamate receptor signaling pathway|ion channel activity|channel activity|ionotropic glutamate receptor activity|extracellular ligand-gated ion channel activity|ion channel complex|ligand-gated channel activity|passive transmembrane transporter activity|substrate-specific channel activity|cytoplasmic vesicle membrane|ionotropic glutamate receptor complex|ligand-gated ion c…	GO:0022836|GO:0007215|GO:0005216|GO:0015267|GO:0004970|GO:0005230|GO:0034702|GO:0022834|GO:0022803|GO:0022838|GO:0030659|GO:0008328|GO:0015276|GO:0030666|GO:0008066|GO:0035235|GO:1902495|GO:0030139|GO:0012506|GO:0043235|GO:0032281	382.134	2.56851	-65	0.00172117	106	0.5	0.0599291	ENSG00000152578	ENSP00000436449	2893	GRIA4	-0.195431	Cluster 5	Clustered	8.20195	H__sapiens__1_-710551	query	GRIA4	2.23939	NM_001112812	NP_001106283	0.82248	FALSE	H__sapiens__1_-710551	6838	GLURD	P48058
792			115.703	3.04733	-101	0.00162075	56	0.333333	0.0363259	ENSG00000102385	ENSP00000444752	1821	DRP2	-0.218937	Cluster 4	Clustered	11.697	H__sapiens__1_-703647	query	DRP2	2.1303	NM_001939	NP_001930	0.803373	FALSE	H__sapiens__1_-703647	1826		Q13474
804	cellular response to xenobiotic stimulus|xenobiotic metabolic process|carboxylic acid binding|glutathione derivative biosynthetic process|peptide metabolic process|amino acid binding|transferase activity, transferring alkyl or aryl (other than methyl) groups|response to xenobiotic stimulus|organic acid binding|cellular modified amino acid metabolic process|glutathione transferase activity|cellula…	GO:0071466|GO:0006805|GO:0031406|GO:1901687|GO:0006518|GO:0016597|GO:0016765|GO:0009410|GO:0043177|GO:0006575|GO:0004364|GO:0043603|GO:0006749|GO:1901685	73.8468	3.37474	-119	0.0015748	37	0.333333	0.0213154	ENSG00000134184	ENSP00000456315	2944	GSTM1	-0.20233	Cluster 6	Clustered	7	H__sapiens__1_-707832	query	GSTM1	2.07576	NM_146421	NP_666533	0.816825	FALSE	H__sapiens__1_-707832	1152	H-B	P09488
806	response to glucagon|cellular response to peptide|response to peptide|cellular response to peptide hormone stimulus|energy reserve metabolic process|response to peptide hormone|GTPase activity|energy derivation by oxidation of organic compounds|cellular response to glucagon stimulus	GO:0033762|GO:1901653|GO:1901652|GO:0071375|GO:0006112|GO:0043434|GO:0003924|GO:0015980|GO:0071377	325.351	3.00146	-74	0.00169492	93	0.333333	0.0531467	ENSG00000242616	ENSP00000363411	2790	GNG10	-0.184678	Cluster 1	Clustered	22.3915	H__sapiens__1_-739365	query	GNG10	2.21212	NM_001198664	NP_001185593	0.831372	FALSE	H__sapiens__1_-739365	4504		P50151
818			57.8697	3.53758	-121	0.0015674	36	0.333333	0.0236865	ENSG00000119125	ENSP00000437972	9615	GDA	-0.120674	Cluster 6	Clustered	6.975	H__sapiens__1_-705858	query	GDA	2.06667	NM_004293	NP_004284	0.886323	FALSE	H__sapiens__1_-705858	860		Q9Y2T3
821	protein phosphatase regulator activity|protein phosphatase type 2A regulator activity|protein dephosphorylation|regulation of growth|eye photoreceptor cell differentiation|regulation of protein catabolic process|protein phosphatase type 2A complex|protein serine/threonine phosphatase complex|developmental growth|phosphatase regulator activity	GO:0019888|GO:0008601|GO:0006470|GO:0040008|GO:0001754|GO:0042176|GO:0000159|GO:0008287|GO:0048589|GO:0019208	300.315	4.49559	-83	0.00166667	66	0.333333	0.0420255	ENSG00000073711	ENSP00000419344	5523	PPP2R3A	-0.219927	Cluster 7	Clustered	5.01008	H__sapiens__1_-702211	query	PPP2R3	2.18182	NM_181897	NP_871626	0.802577	FALSE	H__sapiens__1_-702211	4004	PPP2R3	Q06190
851	negative regulation of protein serine/threonine kinase activity|negative regulation of phosphorylation|regulation of stress-activated MAPK cascade|stress-activated protein kinase signaling cascade|regulation of neuron death|regulatory region nucleic acid binding|regulation of cellular response to stress|cell-type specific apoptotic process|transcription regulatory region DNA binding|cellular resp…	GO:0071901|GO:0042326|GO:0032872|GO:0031098|GO:1901214|GO:0001067|GO:0080135|GO:0097285|GO:0044212|GO:0071478|GO:1901215|GO:0051403|GO:0043407|GO:0033673|GO:0071482|GO:0043405|GO:0051348|GO:0009314|GO:0010563|GO:0043409|GO:0051402|GO:0097193|GO:0019901|GO:0043524|GO:0007346|GO:0045936|GO:0006469|GO:0001933|GO:0071214|GO:0071900|GO:0070997|GO:0000975|GO:1902532|GO:0043523|GO:0009416	59.0127	4.03762	-122	0.0015625	32	0.333333	0.019886	ENSG00000078900	ENSP00000475143	7161	TP73	-0.175111		Unclustered	3.2	H__sapiens__1_-702419	query	TP73	2.06061	NM_005427	NP_005418	0.839364	FALSE	H__sapiens__1_-702419	950	P73	O15350
855	mitochondrial matrix|energy derivation by oxidation of organic compounds|cellular respiration|tricarboxylic acid cycle|aerobic respiration	GO:0005759|GO:0015980|GO:0045333|GO:0006099|GO:0009060	181.579	2.19399	-78	0.0016835	88	0.333333	0.0620777	ENSG00000166411	ENSP00000485769	3419	IDH3A	-0.220989	Cluster 4	Clustered	14.296	H__sapiens__1_-712845	query	IDH3A	2.2	NM_005530	NP_005521	0.801725	FALSE	H__sapiens__1_-712845	3376		P50213
874	toll-like receptor signaling pathway|positive regulation of DNA metabolic process|immune response-activating cell surface receptor signaling pathway|regulation of histone modification|positive regulation of defense response|toll-like receptor 5 signaling pathway|histone modification|toll-like receptor 9 signaling pathway|activation of innate immune response|regulation of cellular response to stre…	GO:0002224|GO:0051054|GO:0002429|GO:0031056|GO:0031349|GO:0034146|GO:0016570|GO:0034162|GO:0002218|GO:0080135|GO:0030522|GO:0002221|GO:0033044|GO:0038095|GO:0016569|GO:0034166|GO:0034134|GO:0038124|GO:0045089|GO:0038123|GO:0002768|GO:0034142|GO:0002755|GO:0051091|GO:0045088|GO:0043122|GO:0010638|GO:0002758|GO:1902275|GO:0038093	142.313	3.69032	-96	0.00163399	54	0.333333	0.0416366	ENSG00000177889	ENSP00000450260	7334	UBE2N	-0.273673	Cluster 5	Clustered	8.125	H__sapiens__1_-715397	query	UBE2N	2.14545	NM_003348	NP_003339	0.760581	FALSE	H__sapiens__1_-715397	2322	UbcH-ben	P61088
892	secretory granule lumen|extrinsic component of membrane|regulation of cell adhesion|exocytosis|secretory granule|platelet activation|platelet alpha granule lumen|negative regulation of multicellular organismal process|extrinsic component of plasma membrane|vesicle lumen|platelet degranulation|platelet alpha granule|cytoplasmic membrane-bounded vesicle lumen|blood microparticle	GO:0034774|GO:0019898|GO:0030155|GO:0006887|GO:0030141|GO:0030168|GO:0031093|GO:0051241|GO:0019897|GO:0031983|GO:0002576|GO:0031091|GO:0060205|GO:0072562	277.964	4.17628	-89	0.00165289	67	0.333333	0.0413606	ENSG00000122194	ENSP00000389424	5340	PLG	-0.27962	Cluster 8	Seed	4.62698	H__sapiens__1_-706228	query	PLG	2.16667	NM_001168338	NP_001161810	0.756071	FALSE	H__sapiens__1_-706228	3888		P00747
921	response to lipid|coated vesicle|regulation of hormone levels|regulation of cell adhesion|vasculogenesis|endocytic vesicle|vascular endothelial growth factor receptor signaling pathway|lipid localization|hormone secretion|vesicle membrane|regulation of cellular response to growth factor stimulus|cellular response to lipid|coated vesicle membrane|clathrin-coated vesicle|lipid transport|hormone tra…	GO:0033993|GO:0030135|GO:0010817|GO:0030155|GO:0001570|GO:0030139|GO:0048010|GO:0010876|GO:0046879|GO:0012506|GO:0090287|GO:0071396|GO:0030662|GO:0030136|GO:0006869|GO:0009914|GO:0030665|GO:0030659|GO:0048511|GO:0030666|GO:0030165|GO:0023061|GO:0051091|GO:0030947|GO:0030669|GO:0007420	229.996	4.2071	-88	0.00165563	63	0.333333	0.0407666	ENSG00000174804	ENSP00000434034	8322	FZD4	-0.17039	Cluster 2	Clustered	16	H__sapiens__1_-714766	query	FZD4	2.1697	NM_012193	NP_036325	0.843336	FALSE	H__sapiens__1_-714766	3544	CD344	Q9ULV1
948			159.839	5.43852	-107	0.00160514	42	0.333333	0.0296417	ENSG00000154710	ENSP00000476796	27342	RABGEF1	-0.131275	Cluster 6	Clustered	6.15441	H__sapiens__1_-710791	query	RABGEF1	2.11212	NM_014504	NP_055319	0.876977	FALSE	H__sapiens__1_-710791	2652	RABEX5	Q9UJ41
950	behavior|positive regulation of mitotic cell cycle phase transition|regulation of stress-activated MAPK cascade|stress-activated protein kinase signaling cascade|striated muscle tissue development|muscle cell differentiation|exocytosis|muscle tissue development|response to interleukin-1|regulation of cellular response to stress|regulation of calcium ion-dependent exocytosis|positive regulation of…	GO:0007610|GO:1901992|GO:0032872|GO:0031098|GO:0014706|GO:0042692|GO:0006887|GO:0060537|GO:0070555|GO:0080135|GO:0017158|GO:1901989|GO:0051783|GO:0051403|GO:0040008|GO:0004629|GO:0051146|GO:0048589|GO:0001819|GO:0051302|GO:0016298|GO:0055002|GO:0090068|GO:1900087|GO:0007215|GO:0007213|GO:0050890|GO:0060627|GO:0007346|GO:0017157|GO:0044708|GO:0007611|GO:0030900|GO:0005516|GO:0045445|GO:0043410|GO:…	659.586	2.84892	-39	0.0018018	134	0.5	0.0774593	ENSG00000182621	ENSP00000490862	23236	PLCB1	-0.196603	Cluster 3	Clustered	9.35652	H__sapiens__1_-716300	query	PLCB1	2.31818	NM_182734	NP_877398	0.821517	FALSE	H__sapiens__1_-716300	9856	PLC154	Q9NQ66
964	inflammatory response|positive regulation of inflammatory response|positive regulation of response to external stimulus|positive regulation of defense response|positive regulation of cytokine production|regulation of inflammatory response	GO:0006954|GO:0050729|GO:0032103|GO:0031349|GO:0001819|GO:0050727	276.257	5.24705	-97	0.00163132	54	0.333333	0.0305245	ENSG00000164136	ENSP00000436914	3600	IL15	-0.225746	Cluster 6	Clustered	6.225	H__sapiens__1_-712261	query	IL15	2.14242	NM_172175	NP_751915	0.797921	FALSE	H__sapiens__1_-712261	3574	MGC9721	P40933
978	lysosomal membrane|response to glucagon|cellular response to peptide|response to peptide|cellular response to peptide hormone stimulus|forebrain development|response to peptide hormone|subthalamus development|cellular response to glucagon stimulus|vacuolar membrane|energy reserve metabolic process|diencephalon development|energy derivation by oxidation of organic compounds|vacuolar part|substanti…	GO:0005765|GO:0033762|GO:1901653|GO:1901652|GO:0071375|GO:0030900|GO:0043434|GO:0021539|GO:0071377|GO:0005774|GO:0006112|GO:0021536|GO:0015980|GO:0044437|GO:0021762|GO:0007420	231.147	2.46522	-81	0.00167504	88	0.333333	0.0483041	ENSG00000114450	ENSP00000420606	59345	GNB4	-0.163267	Cluster 1	Clustered	22.3915	H__sapiens__1_-705273	query	GNB4	2.19091	NM_021629	NP_067642	0.849364	FALSE	H__sapiens__1_-705273	3438		Q9HAV0
984	microtubule	GO:0005874	623.562	2.70696	-47	0.0017762	129	0.5	0.0707146	ENSG00000092964	ENSP00000431117	1808	DPYSL2	-0.32611	Cluster 3	Clustered	9.95501	H__sapiens__1_-702965	query	DPYSL2	2.29394	NM_001386	NP_001377	0.721726	FALSE	H__sapiens__1_-702965	9024	DRP-2	Q16555
995			107.83	4.55762	-108	0.00160256	41	0.333333	0.0308875	ENSG00000127526	ENSP00000470652	79939	SLC35E1	-0.131997		Unclustered	4.92	H__sapiens__1_-706911	query	SLC35E1	2.10909	NM_024881	NP_079157	0.876344	FALSE	H__sapiens__1_-706911	1914	FLJ14251	Q96K37
999	epithelial cell differentiation|positive regulation of cell migration|positive regulation of cell motility|regulation of immune effector process|cellular response to interferon-gamma|T cell activation|endothelial cell development|leukocyte mediated immunity|response to interferon-gamma|positive regulation of cellular component movement|epithelial cell development|regulation of leukocyte migration…	GO:0030855|GO:0030335|GO:2000147|GO:0002697|GO:0071346|GO:0042110|GO:0001885|GO:0002443|GO:0034341|GO:0051272|GO:0002064|GO:0002685|GO:0002687|GO:0040017	159.864	3.94007	-106	0.00160256	48	0.333333	0.026822	ENSG00000090339	ENSP00000465680	3383	ICAM1	-0.337777	Cluster 8	Clustered	4.45846	H__sapiens__1_-702848	query	ICAM1	2.10909	NM_000201	NP_000192	0.713354	FALSE	H__sapiens__1_-702848	1958	CD54	P05362
1000	covalent chromatin modification|histone modification	GO:0016569|GO:0016570	10.4279	4.02336	-169	0.00142857	11	0.333333	0.00619471	ENSG00000163840	ENSP00000373157	151636	DTX3L	-0.13773	Cluster 8	Clustered	3.73333	H__sapiens__1_-712148	query	DTX3L	1.87879	NM_138287	NP_612144	0.871334	FALSE	H__sapiens__1_-712148	148	BBAP	Q8TDB6
1002			34.1062	2.82238	-112	0.00159236	34	0.333333	0.030669	ENSG00000128872	ENSP00000453524	29767	TMOD2	-0.121286	Cluster 3	Clustered	9.71429	H__sapiens__1_-707062	query	TMOD2	2.09697	NM_014548	NP_055363	0.88578	FALSE	H__sapiens__1_-707062	738	NTMOD	Q9NZR1
1011	lysosomal membrane|vacuolar membrane|receptor metabolic process|exocytosis|vacuolar part|PDZ domain binding	GO:0005765|GO:0005774|GO:0043112|GO:0006887|GO:0044437|GO:0030165	349.383	3.13963	-74	0.00169492	93	0.333333	0.0546734	ENSG00000278174	ENSP00000488517	4905	NSF	-0.173138	Cluster 4	Seed	14.4798	H__sapiens__1_-702224	query	NSF	2.21212	NM_006178	NP_006169	0.841022	FALSE	H__sapiens__1_-702224	5300		P46459
1017	transcription regulatory region DNA binding|cellular response to radiation|cellular response to abiotic stimulus|circadian regulation of gene expression|regulatory region DNA binding|response to light stimulus|rhythmic process|response to radiation|regulatory region nucleic acid binding|core promoter binding	GO:0044212|GO:0071478|GO:0071214|GO:0032922|GO:0000975|GO:0009416|GO:0048511|GO:0009314|GO:0001067|GO:0001047	62.0924	3.43175	-120	0.00156986	34	0.333333	0.0200355	ENSG00000134852	ENSP00000426983	9575	CLOCK	-0.199031		Unclustered	2.4	H__sapiens__1_-707957	query	CLOCK	2.0697	NM_004898	NP_004889	0.819525	FALSE	H__sapiens__1_-707957	958	KIAA0334	O15516
1020	nucleocytoplasmic transport|nuclear transport	GO:0006913|GO:0051169	624.317	3.8517	-50	0.00176678	108	0.5	0.0697293	ENSG00000124788	ENSP00000416360	6310	ATXN1	-0.35276	Cluster 6	Clustered	6.90565	H__sapiens__1_-706571	query	ATXN1	2.28485	NM_001128164	NP_001121636	0.702746	FALSE	H__sapiens__1_-706571	9190	SCA1	P54253
1029	toll-like receptor signaling pathway|negative regulation of steroid biosynthetic process|regulation of steroid biosynthetic process|membrane protein proteolysis|positive regulation of defense response|toll-like receptor 5 signaling pathway|hyaluronan metabolic process|response to interleukin-1|regulatory region nucleic acid binding|activation of innate immune response|negative regulation of oxido…	GO:0002224|GO:0010894|GO:0050810|GO:0033619|GO:0031349|GO:0034146|GO:0030212|GO:0070555|GO:0001067|GO:0002218|GO:0051354|GO:0002221|GO:0044212|GO:0006109|GO:0035666|GO:1901617|GO:0034134|GO:0042368|GO:0045089|GO:0032768|GO:0019218|GO:0038123|GO:0006869|GO:0034142|GO:0015850|GO:0006954|GO:0006066|GO:0038179|GO:0051091|GO:0034138|GO:0000975|GO:0043255|GO:0048011|GO:0002429|GO:0009110|GO:0045939|GO:…	419.279	4.21865	-78	0.0016835	77	0.333333	0.0457507	ENSG00000109320	ENSP00000469340	4790	NFKB1	-0.36208	Cluster 8	Clustered	4.55134	H__sapiens__1_-704636	query	NFKB1	2.2	NM_003998	NP_003989	0.696227	FALSE	H__sapiens__1_-704636	5590	NFKB-p50	P19838
1032	cellular metal ion homeostasis|divalent inorganic cation transmembrane transporter activity|gated channel activity|regulation of sequestering of calcium ion|peptide hormone secretion|response to hypoxia|substrate-specific channel activity|regulation of phospholipase C activity|ligand-gated ion channel activity|positive regulation of lipase activity|calcium ion homeostasis|divalent inorganic catio…	GO:0006875|GO:0072509|GO:0022836|GO:0051282|GO:0030072|GO:0001666|GO:0022838|GO:1900274|GO:0015276|GO:0060193|GO:0055074|GO:0072507|GO:0036293|GO:0046873|GO:0055065|GO:0012506|GO:0006112|GO:0008543|GO:0051209|GO:0038094|GO:0005216|GO:0090087|GO:0072511|GO:0022834|GO:0030659|GO:0051480|GO:0030141|GO:0030168|GO:0072503|GO:0023061|GO:0038179|GO:0060401|GO:0030003|GO:0038127|GO:0048011|GO:0090276|GO:…	216.137	2.9567	-87	0.00165837	72	0.333333	0.042679	ENSG00000150995	ENSP00000440564	3708	ITPR1	-0.274655	Cluster 6	Clustered	6.78663	H__sapiens__1_-710345	query	ITPR1	2.17273	NM_002222	NP_002213	0.759835	FALSE	H__sapiens__1_-710345	3296	SCA29	Q14643
1039	cellular metal ion homeostasis|behavior|neuron projection terminus|dendrite development|adrenergic receptor binding|regulation of long-term neuronal synaptic plasticity|dendritic spine organization|synaptic vesicle transport|regulation of ion transmembrane transport|neuron projection|calcium ion homeostasis|regulation of ion transmembrane transporter activity|divalent inorganic cation homeostasis…	GO:0006875|GO:0007610|GO:0044306|GO:0016358|GO:0031690|GO:0048169|GO:0097061|GO:0048489|GO:0034765|GO:0043005|GO:0055074|GO:0032412|GO:0072507|GO:0006898|GO:0030139|GO:0055065|GO:0012506|GO:0032409|GO:0045202|GO:0030424|GO:0007215|GO:0031623|GO:0007611|GO:0048488|GO:0030659|GO:0051480|GO:0030100|GO:0030165|GO:0034762|GO:0072503|GO:0050808|GO:1902495|GO:0048259|GO:0030003|GO:0030425|GO:0051640|GO:…	890.455	2.6671	-30	0.0018315	165	0.5	0.090502	ENSG00000132535	ENSP00000467897	1742	DLG4	-0.380234	Cluster 3	Clustered	11.2994	H__sapiens__1_-707594	query	DLG4	2.34545	NM_001365	NP_001356	0.683701	FALSE	H__sapiens__1_-707594	13426	SAP90	P78352
1041	electron transport chain|oxidative phosphorylation|mitochondrial respiratory chain|oxidoreductase complex|respiratory chain|mitochondrial membrane part|respiratory electron transport chain|energy derivation by oxidation of organic compounds|cellular respiration|mitochondrial membrane|organelle inner membrane|mitochondrial inner membrane	GO:0022900|GO:0006119|GO:0005746|GO:1990204|GO:0070469|GO:0044455|GO:0022904|GO:0015980|GO:0045333|GO:0031966|GO:0019866|GO:0005743	149.001	2.59204	-89	0.00165289	73	0.333333	0.0513228	ENSG00000281434	ENSP00000487517	4705	NDUFA10	-0.139128	Cluster 4	Clustered	11.6907	H__sapiens__1_-707250	query	NDUFA10	2.16667	NM_004544	NP_004535	0.870117	FALSE	H__sapiens__1_-707250	2520	CI-42k	O95299
1049	toll-like receptor signaling pathway|toll-like receptor TLR1:TLR2 signaling pathway|stress-activated protein kinase signaling cascade|positive regulation of defense response|toll-like receptor 4 signaling pathway|toll-like receptor 5 signaling pathway|MyD88-dependent toll-like receptor signaling pathway|toll-like receptor 9 signaling pathway|activation of innate immune response|MyD88-independent …	GO:0002224|GO:0038123|GO:0031098|GO:0031349|GO:0034142|GO:0034146|GO:0002755|GO:0034162|GO:0002218|GO:0002756|GO:0038179|GO:0002221|GO:0034138|GO:0045088|GO:0051403|GO:0035666|GO:0002758|GO:0034166|GO:0034134|GO:0038124|GO:0048011|GO:0045089	104.435	3.05879	-101	0.00161812	53	0.333333	0.0362183	ENSG00000126767	ENSP00000366182	2002	ELK1	-0.208862	Cluster 8	Clustered	4.33613	H__sapiens__1_-706833	query	ELK1	2.12727	NM_005229	NP_005220	0.811507	FALSE	H__sapiens__1_-706833	1868		P19419
1052	cellular metal ion homeostasis|receptor metabolic process|regulation of immune effector process|antigen processing and presentation of exogenous peptide antigen via MHC class II|response to virus|transition metal ion homeostasis|establishment of vesicle localization|vesicle localization|GTPase activity|dendritic spine organization|regulation of receptor internalization|receptor-mediated endocytos…	GO:0006875|GO:0043112|GO:0002697|GO:0019886|GO:0009615|GO:0055076|GO:0051650|GO:0051648|GO:0003924|GO:0097061|GO:0002090|GO:0006898|GO:0055065|GO:0050804|GO:0006873|GO:0046916|GO:0051656|GO:0060627|GO:0048167|GO:0031623|GO:0030100|GO:0050805|GO:0006892|GO:0048193|GO:0048259|GO:0010638|GO:0030003|GO:0051640	176.908	3.2651	-91	0.00164745	65	0.333333	0.0448629	ENSG00000143761	ENSP00000442980	375	ARF1	-0.22768	Cluster 7	Clustered	5.27692	H__sapiens__1_-709453	query	ARF1	2.16061	NM_001658	NP_001649	0.796379	FALSE	H__sapiens__1_-709453	3172		P84077
1058	cellular metal ion homeostasis|response to lipid|regulation of histone modification|peptidyl-serine modification|synaptic vesicle transport|negative regulation of oxidoreductase activity|perinuclear region of cytoplasm|regulation of neurotransmitter levels|response to catecholamine|divalent inorganic cation homeostasis|regulation of carbohydrate metabolic process|regulation of calcium ion transpo…	GO:0006875|GO:0033993|GO:0031056|GO:0018209|GO:0048489|GO:0051354|GO:0048471|GO:0001505|GO:0071869|GO:0072507|GO:0006109|GO:0010522|GO:0044262|GO:0055065|GO:1901617|GO:0010959|GO:0032409|GO:0009712|GO:0030424|GO:0031623|GO:0017157|GO:0045744|GO:0048488|GO:0030659|GO:0071868|GO:0051480|GO:0030100|GO:0018105|GO:0015850|GO:0010640|GO:0010676|GO:0030141|GO:0072503|GO:0002237|GO:0018958|GO:0015872|GO:…	917.757	2.57096	-19	0.00186916	167	0.5	0.0983272	ENSG00000145335	ENSP00000484044	6622	SNCA	-0.587944	Cluster 3	Clustered	9.91596	H__sapiens__1_-709679	query	SNCA	2.37879	NM_007308	NP_009292	0.555468	FALSE	H__sapiens__1_-709679	14380	PARK4	P37840
1065	regulation of ERK1 and ERK2 cascade|receptor metabolic process|regulation of immune effector process|androgen receptor signaling pathway|regulation of receptor internalization|leukocyte mediated immunity|positive regulation of endocytosis|intracellular receptor signaling pathway|receptor-mediated endocytosis|endocytic vesicle|ERK1 and ERK2 cascade|positive regulation of ERK1 and ERK2 cascade|regu…	GO:0070372|GO:0043112|GO:0002697|GO:0030521|GO:0002090|GO:0002443|GO:0045807|GO:0030522|GO:0006898|GO:0030139|GO:0070371|GO:0070374|GO:0060627|GO:0031623|GO:0051098|GO:0045744|GO:0030100|GO:0043410|GO:0030168|GO:0008277|GO:0048260|GO:0045088|GO:0048259|GO:0002092|GO:0001664	256.727	3.02379	-75	0.00169205	85	0.333333	0.0572676	ENSG00000141480	ENSP00000466857	409	ARRB2	-0.599894	Cluster 3	Clustered	9.26246	H__sapiens__1_-709112	query	ARRB2	2.20909	NM_199004	NP_945355	0.54887	FALSE	H__sapiens__1_-709112	4532	DKFZp686L0365	P32121
1069	cellular metal ion homeostasis|behavior|visual learning|secretory granule lumen|locomotory behavior|dendrite development|multicellular organism growth|transition metal ion homeostasis|regulation of protein tyrosine kinase activity|exocytosis|neuron projection|regulation of synapse structure and activity|perinuclear region of cytoplasm|axon cargo transport|vesicle lumen|ionotropic glutamate recept…	GO:0006875|GO:0007610|GO:0008542|GO:0034774|GO:0007626|GO:0016358|GO:0035264|GO:0055076|GO:0061097|GO:0006887|GO:0043005|GO:0050803|GO:0048471|GO:0008088|GO:0031983|GO:0035235|GO:0040008|GO:0055065|GO:0007176|GO:0048589|GO:0040014|GO:0045202|GO:0030424|GO:0007215|GO:0007346|GO:0007611|GO:0030141|GO:0030168|GO:0052548|GO:0007018|GO:0051705|GO:0070997|GO:0030003|GO:0009416|GO:0038127|GO:0030425|GO:…	1040.94	3.43938	-21	0.0018622	154	0.5	0.0948827	ENSG00000142192	ENSP00000406539	351	APP	-0.671683	Cluster 5	Clustered	8.13529	H__sapiens__1_-709204	query	APP	2.37273	NM_201414	NP_958817	0.510848	FALSE	H__sapiens__1_-709204	15262	AD1	P05067
1073	gated channel activity|response to lipid|negative regulation of steroid biosynthetic process|regulation of steroid biosynthetic process|peptide hormone secretion|striated muscle tissue development|muscle cell differentiation|substrate-specific channel activity|cardiac muscle tissue development|response to drug|exocytosis|muscle tissue development|regulatory region nucleic acid binding|response to…	GO:0022836|GO:0033993|GO:0010894|GO:0050810|GO:0030072|GO:0014706|GO:0042692|GO:0022838|GO:0048738|GO:0042493|GO:0006887|GO:0060537|GO:0001067|GO:0048545|GO:0044212|GO:0046873|GO:0016575|GO:1901617|GO:0051146|GO:0005216|GO:0090087|GO:0019218|GO:0017157|GO:0045445|GO:0050767|GO:0015672|GO:0023061|GO:0006066|GO:0052548|GO:0071407|GO:0000975|GO:0001047|GO:0090276|GO:0015267|GO:0050796|GO:0010817|GO:…	64.4669	5.0286	-123	0.00155763	29	0.333333	0.0192076	ENSG00000084093	ENSP00000484836	5978	REST	-0.194616		Unclustered	2.94872	H__sapiens__1_-702598	query	REST	2.05455	NM_005612	NP_005603	0.823151	FALSE	H__sapiens__1_-702598	968	XBR	Q13127
1089	negative regulation of protein transport|establishment of protein localization to mitochondrion|positive regulation of mitochondrial membrane permeability involved in apoptotic process|regulation of mitochondrial membrane permeability involved in apoptotic process|perinuclear region of cytoplasm|protein dephosphorylation|vesicle membrane|fibroblast growth factor receptor signaling pathway|negativ…	GO:0051224|GO:0072655|GO:1902110|GO:1902108|GO:0048471|GO:0006470|GO:0012506|GO:0008543|GO:0010563|GO:0010821|GO:0010822|GO:1901653|GO:0031406|GO:0032147|GO:0071375|GO:0035794|GO:0030659|GO:0007005|GO:0016597|GO:1902686|GO:0090150|GO:0038179|GO:1901028|GO:1900740|GO:2001233|GO:0032868|GO:0008286|GO:0038127|GO:0048011|GO:0035304|GO:0007006|GO:1900739|GO:0001844|GO:0051204|GO:0046902|GO:0032869|GO:…	1150.1	2.55459	10	0.00193798	200	0.5	0.119928	ENSG00000166913	ENSP00000488178	7529	YWHAB	-3.68128	Cluster 3	Seed	11.5698	H__sapiens__1_-712972	result		2.43636	NM_139323	NP_647539	0.0251906	FALSE	H__sapiens__1_-712972	18608	YWHAA	P31946
1103	response to glucagon|regulation of blood pressure|cellular response to peptide|response to peptide|cellular response to peptide hormone stimulus|blood circulation|energy reserve metabolic process|response to peptide hormone|GTPase activity|energy derivation by oxidation of organic compounds|circulatory system process|cellular response to glucagon stimulus	GO:0033762|GO:0008217|GO:1901653|GO:1901652|GO:0071375|GO:0008015|GO:0006112|GO:0043434|GO:0003924|GO:0015980|GO:0003013|GO:0071377	177.855	1.90194	-85	0.00166389	86	0.333333	0.0431349	ENSG00000111664	ENSP00000445967	2784	GNB3	-0.235877	Cluster 1	Clustered	22.3915	H__sapiens__1_-704900	query	GNB3	2.17879	NM_002075	NP_002066	0.789877	FALSE	H__sapiens__1_-704900	2806		P16520
1106	monosaccharide biosynthetic process|hexose metabolic process|glucose metabolic process|glucose catabolic process|carbohydrate catabolic process|forebrain development|hexose catabolic process|subthalamus development|glycolysis|monosaccharide catabolic process|single-organism carbohydrate catabolic process|gluconeogenesis|carbohydrate biosynthetic process|diencephalon development|substantia nigra d…	GO:0046364|GO:0019318|GO:0006006|GO:0006007|GO:0016052|GO:0030900|GO:0019320|GO:0021539|GO:0006096|GO:0046365|GO:0044724|GO:0006094|GO:0016051|GO:0021536|GO:0021762|GO:0005996|GO:0007420|GO:0019319	101.522	1.82841	-100	0.00162338	71	0.333333	0.0411867	ENSG00000108515	ENSP00000467444	2027	ENO3	-3.74897	Cluster 3	Clustered	9.87387	H__sapiens__1_-704521	result		2.13333	NM_053013	NP_443739	0.0235419	FALSE	H__sapiens__1_-704521	1790		P13929
1108	'de novo' protein folding|protein folding|microtubule|'de novo' posttranslational protein folding	GO:0006458|GO:0006457|GO:0005874|GO:0051084	70.1821	0.961153	-94	0.00163934	88	0.333333	0.0501346	ENSG00000120438	ENSP00000444423	6950	TCP1	-3.76261	Cluster 4	Clustered	12.7991	H__sapiens__1_-706035	result		2.15152	NM_030752	NP_110379	0.0232231	FALSE	H__sapiens__1_-706035	1788	Ccta	P17987
1129			216.622	3.94576	-81	0.00167504	66	0.5	0.0506335	ENSG00000011007	ENSP00000484196	6924	TCEB3	-0.203894	Cluster 6	Clustered	6.25	H__sapiens__1_-701249	query	TCEB3A	2.19091	NM_003198	NP_003189	0.815548	FALSE	H__sapiens__1_-701249	3498	TCEB3A	Q14241
1140	response to glucagon|cellular response to peptide|response to peptide|cellular response to peptide hormone stimulus|energy reserve metabolic process|response to peptide hormone|GTPase activity|energy derivation by oxidation of organic compounds|cellular response to glucagon stimulus	GO:0033762|GO:1901653|GO:1901652|GO:0071375|GO:0006112|GO:0043434|GO:0003924|GO:0015980|GO:0071377	17.4861	0.55579	-121	0.00156495	51	0.333333	0.0227097	ENSG00000167414	ENSP00000300873	94235	GNG8	-0.0726032	Cluster 1	Clustered	22.3915	H__sapiens__1_-713087	query	GNG8	2.06364	NM_033258	NP_150283	0.92997	FALSE	H__sapiens__1_-713087	308		Q9UK08
1146			24.9226	2.94273	-144	0.00151286	27	0.333333	0.0217629	ENSG00000105185	ENSP00000476525	9141	PDCD5	-0.175236	Cluster 5	Clustered	7.97386	H__sapiens__1_-704024	query	PDCD5	1.99697	NM_004708	NP_004699	0.839259	FALSE	H__sapiens__1_-704024	360	TFAR19	O14737
1150	response to organic cyclic compound|cellular response to organic cyclic compound	GO:0014070|GO:0071407	85.9332	4.43344	-118	0.0015748	36	0.333333	0.0237021	ENSG00000135625	ENSP00000445626	1961	EGR4	-0.205399	Cluster 3	Clustered	9.84848	H__sapiens__1_-708106	query	EGR4	2.07576	NM_001965	NP_001956	0.814322	FALSE	H__sapiens__1_-708106	1174	PAT133	Q05215
1156	removal of superoxide radicals|reactive oxygen species metabolic process|regulation of blood pressure|response to oxidative stress|regulation of neuron death|response to superoxide|intrinsic apoptotic signaling pathway in response to oxidative stress|regulation of systemic arterial blood pressure|regulation of cellular response to stress|cell-type specific apoptotic process|cellular response to r…	GO:0019430|GO:0072593|GO:0008217|GO:0006979|GO:1901214|GO:0000303|GO:0008631|GO:0003073|GO:0080135|GO:0097285|GO:0034614|GO:0008637|GO:1901215|GO:0008015|GO:0010035|GO:0034599|GO:0051402|GO:0000302|GO:0016209|GO:0097193|GO:0043524|GO:0005759|GO:0007005|GO:0003013|GO:2001234|GO:1900407|GO:0071451|GO:2001233|GO:1902175|GO:0006801|GO:0070997|GO:1902532|GO:0043523	137.648	3.78298	-98	0.00162602	53	0.333333	0.036385	ENSG00000112096	ENSP00000446252	6648	SOD2	-0.212788	Cluster 6	Clustered	6.33048	H__sapiens__1_-704980	query	SOD2	2.13636	NM_001322817	NP_001309749	0.808328	FALSE	H__sapiens__1_-704980	2026		P04179
1164	carbohydrate kinase activity|glycolysis|hexose metabolic process|glucose metabolic process|glucose catabolic process|monosaccharide catabolic process|single-organism carbohydrate catabolic process|carbohydrate catabolic process|cellular carbohydrate metabolic process|hexose catabolic process|monosaccharide metabolic process|carbohydrate phosphorylation	GO:0019200|GO:0006096|GO:0019318|GO:0006006|GO:0006007|GO:0046365|GO:0044724|GO:0016052|GO:0044262|GO:0019320|GO:0005996|GO:0046835	106.505	2.62049	-92	0.00164474	62	0.333333	0.0485708	ENSG00000156515	ENSP00000415949	3098	HK1	-0.174354	Cluster 5	Clustered	7.80127	H__sapiens__1_-710994	query	HK1	2.15758	NM_033500	NP_277035	0.839999	FALSE	H__sapiens__1_-710994	2084		P19367
1167	regulation of mitotic cell cycle|forebrain development|striated muscle tissue development|regulation of mitosis|cofactor binding|microtubule|muscle tissue development|histone modification|subthalamus development|mitosis|regulation of nuclear division|covalent chromatin modification|histone deacetylation|diencephalon development|substantia nigra development|brain development|regulation of cell div…	GO:0007346|GO:0030900|GO:0014706|GO:0007088|GO:0048037|GO:0005874|GO:0060537|GO:0016570|GO:0021539|GO:0007067|GO:0051783|GO:0016569|GO:0016575|GO:0021536|GO:0021762|GO:0007420|GO:0051302	209.389	5.36384	-95	0.00163666	52	0.333333	0.0359967	ENSG00000283100	ENSP00000489602	22933	SIRT2	-0.231245		Unclustered	2.49834	H__sapiens__1_-702033	query	SIRT2	2.14848	NM_030593	NP_085096	0.793545	FALSE	H__sapiens__1_-702033	3022	SIR2L	Q8IXJ6
1176			64.5196	3.01924	-111	0.00159236	41	0.333333	0.0288734	ENSG00000164434	ENSP00000357429	2173	FABP7	-0.240704	Cluster 4	Clustered	13.0175	H__sapiens__1_-712351	query	FABP7	2.09697	NM_001446	NP_001437	0.786075	FALSE	H__sapiens__1_-712351	970	BLBP	O15540
1186	extrinsic component of plasma membrane|establishment of organelle localization|synaptic vesicle localization|calmodulin binding|extrinsic component of membrane|establishment of synaptic vesicle localization|synaptic vesicle endocytosis|establishment of vesicle localization|vesicle localization|organelle localization|synaptic vesicle transport|early endosome	GO:0019897|GO:0051656|GO:0097479|GO:0005516|GO:0019898|GO:0097480|GO:0048488|GO:0051650|GO:0051648|GO:0051640|GO:0048489|GO:0005769	204.921	3.19122	-86	0.00166113	70	0.333333	0.0490611	ENSG00000102189	ENSP00000449682	8411	EEA1	-0.245939	Cluster 7	Clustered	4.89623	H__sapiens__1_-703621	query	EEA1	2.17576	NM_003566	NP_003557	0.78197	FALSE	H__sapiens__1_-703621	3586	ZFYVE2	Q15075
1203	regulation of innate immune response	GO:0045088	11.9878	5.32583	-163	0.00145349	11	0.333333	0.00777942	ENSG00000184979	ENSP00000215794	11274	USP18	-0.107089		Unclustered	1.60714	H__sapiens__1_-716870	query	USP18	1.91515	NM_017414	NP_059110	0.898446	FALSE	H__sapiens__1_-716870	188		Q9UMW8
1212			33.3829	4.11639	-144	0.00151057	23	0.333333	0.0168137	ENSG00000237289	ENSP00000486477	1159	CKMT1B	-0.0484125	Cluster 5	Clustered	7.56364	H__sapiens__1_-736836	query	CKMT1B	1.99394	NM_020990	NP_066270	0.952741	FALSE	H__sapiens__1_-736836	606	UMTCK
1214	carboxylic acid catabolic process|glutamine family amino acid metabolic process|alpha-amino acid catabolic process|nitric oxide biosynthetic process|nitric oxide metabolic process|second-messenger-mediated signaling|alpha-amino acid metabolic process|small molecule catabolic process|positive regulation of nitric oxide biosynthetic process|cellular modified amino acid metabolic process|organic aci…	GO:0046395|GO:0009064|GO:1901606|GO:0006809|GO:0046209|GO:0019932|GO:1901605|GO:0044282|GO:0045429|GO:0006575|GO:0016054|GO:0009065|GO:0009063|GO:0045428	49.8704	3.82352	-125	0.00155763	30	0.333333	0.0183352	ENSG00000233076	ENSP00000416785	23564	DDAH2	-0.200669		Unclustered	3.08772	H__sapiens__1_-721501	query	DDAH2	2.05455	NM_013974	NP_039268	0.818183	FALSE	H__sapiens__1_-721501	918		O95865
1233	divalent inorganic cation transmembrane transporter activity|gated channel activity|ion channel activity|channel activity|divalent metal ion transport|divalent inorganic cation transport|calcium ion transmembrane transporter activity|calcium ion transport|passive transmembrane transporter activity|substrate-specific channel activity|inorganic cation transmembrane transporter activity|regulation o…	GO:0072509|GO:0022836|GO:0005216|GO:0015267|GO:0070838|GO:0072511|GO:0015085|GO:0006816|GO:0022803|GO:0022838|GO:0022890|GO:0010975|GO:0050767|GO:0051960|GO:0046873|GO:0005262	250.061	4.36189	-86	0.00166113	63	0.333333	0.042088	ENSG00000107130	ENSP00000486695	23413	NCS1	-0.134499	Cluster 7	Seed	5.81935	H__sapiens__1_-704368	query	NCS1	2.17576	NM_014286	NP_055101	0.874154	FALSE	H__sapiens__1_-704368	3658	NCS-1	P62166
1367	receptor internalization|receptor-mediated endocytosis|receptor metabolic process|regulation of G-protein coupled receptor protein signaling pathway	GO:0031623|GO:0006898|GO:0043112|GO:0008277	120.693	4.46294	-117	0.00157978	40	0.333333	0.0224402	ENSG00000125388	ENSP00000427445	2868	GRK4	-0.17516	Cluster 7	Clustered	5.37662	H__sapiens__1_-706626	query	GRK4	2.08182	NM_182982	NP_892027	0.839323	FALSE	H__sapiens__1_-706626	1886	GPRK4	P32298
1430	mitochondrion organization|mitochondrial membrane|organelle inner membrane|mitochondrial inner membrane	GO:0007005|GO:0031966|GO:0019866|GO:0005743	33.6899	3.86592	-126	0.00155763	27	0.333333	0.0201635	ENSG00000136758	ENSP00000481724	10730	YME1L1	-0.143123		Unclustered	2.86275	H__sapiens__1_-708317	query	YME1L1	2.05455	NM_139312	NP_647473	0.866647	FALSE	H__sapiens__1_-708317	508		Q96TA2
1454	protein kinase binding	GO:0019901	184.682	1.93863	-77	0.00168634	92	0.333333	0.0580843	ENSG00000167658	ENSP00000471265	1938	EEF2	-0.375607	Cluster 3	Clustered	10.5043	H__sapiens__1_-713154	query	EEF2	2.20303	NM_001961	NP_001952	0.686872	FALSE	H__sapiens__1_-713154	3670	EF2	P13639
1476	lysosomal membrane|enzyme inhibitor activity|regulation of histone modification|regulation of ERK1 and ERK2 cascade|receptor metabolic process|extrinsic component of membrane|histone modification|regulatory region nucleic acid binding|regulation of receptor internalization|positive regulation of endocytosis|negative regulation of multicellular organismal process|transcription regulatory region DN…	GO:0005765|GO:0004857|GO:0031056|GO:0070372|GO:0043112|GO:0019898|GO:0016570|GO:0001067|GO:0002090|GO:0045807|GO:0051241|GO:0044212|GO:0033044|GO:0006898|GO:0070371|GO:0016569|GO:0012506|GO:0044437|GO:0070374|GO:0060627|GO:0031623|GO:0032637|GO:0032675|GO:0031234|GO:0032635|GO:0045744|GO:0030659|GO:0030100|GO:0043410|GO:0030168|GO:0008277|GO:0019897|GO:0048260|GO:0005774|GO:0032677|GO:0006892|GO:…	337.392	2.91524	-58	0.00174216	102	0.5	0.0713366	ENSG00000137486	ENSP00000436530	408	ARRB1	-0.404085	Cluster 6	Clustered	7.06378	H__sapiens__1_-708471	query	ARRB1	2.26061	NM_020251	NP_064647	0.667588	FALSE	H__sapiens__1_-708471	6056	ARR1	P49407
1544	divalent inorganic cation transmembrane transporter activity|gated channel activity|behavior|ionotropic glutamate receptor activity|visual learning|neuron projection terminus|substrate-specific channel activity|ligand-gated ion channel activity|neuron projection|calcium ion homeostasis|ionotropic glutamate receptor signaling pathway|divalent inorganic cation homeostasis|metal ion transmembrane tr…	GO:0072509|GO:0022836|GO:0007610|GO:0004970|GO:0008542|GO:0044306|GO:0022838|GO:0015276|GO:0043005|GO:0055074|GO:0035235|GO:0072507|GO:0046873|GO:0045471|GO:0055065|GO:0045202|GO:0030424|GO:0071466|GO:0007215|GO:0005216|GO:0006805|GO:0031406|GO:0007611|GO:0022834|GO:0016597|GO:0009410|GO:0097305|GO:1902495|GO:0009416|GO:0030425|GO:0030135|GO:0015267|GO:0005230|GO:0015085|GO:0034702|GO:0043197|GO:…	128.685	1.9785	-102	0.00161812	75	0.333333	0.0391514	ENSG00000176884	ENSP00000360616	2902	GRIN1	-3.7702	Cluster 5	Clustered	8.37778	H__sapiens__1_-715173	result		2.12727	NM_021569	NP_067544	0.0230474	FALSE	H__sapiens__1_-715173	2868	NMDAR1	Q05586
1569			2.18778	2.45914	-173	0.00141443	9	0.333333	0.00639561	ENSG00000241978	ENSP00000419364	11217	AKAP2	-0.0500926		Unclustered	1.82143	H__sapiens__1_-739076	query	AKAP2	1.85758	NM_001198656	NP_001185585	0.951141	FALSE	H__sapiens__1_-739076	34	PRKA2	Q9Y2D5
1600	'de novo' protein folding|protein folding|'de novo' posttranslational protein folding	GO:0006458|GO:0006457|GO:0051084	25.4445	2.39391	-124	0.0015625	33	0.333333	0.0258536	ENSG00000198033	ENSP00000482878	7278	TUBA3C	-0.0483811		Unclustered	5.52857	H__sapiens__1_-718643	query	TUBA2	2.06061	NM_006001	NP_005992	0.952771	FALSE	H__sapiens__1_-718643	540	TUBA2
1844	response to lipid|extrinsic component of membrane|response to monoamine|response to catecholamine|adenylate cyclase-activating G-protein coupled receptor signaling pathway|energy reserve metabolic process|cellular response to lipid|G-protein coupled receptor signaling pathway, coupled to cyclic nucleotide second messenger|response to glucagon|cellular response to peptide|dopamine receptor signali…	GO:0033993|GO:0019898|GO:0071867|GO:0071869|GO:0007189|GO:0006112|GO:0071396|GO:0007187|GO:0033762|GO:1901653|GO:0007212|GO:0014070|GO:1901652|GO:0071375|GO:0007188|GO:0031234|GO:0071868|GO:0043434|GO:0030168|GO:0071377|GO:0019897|GO:0071407|GO:0005834|GO:0071870|GO:0015980	119.927	1.56182	-90	0.00165017	79	0.333333	0.0390388	ENSG00000186469	ENSP00000484021	54331	GNG2	-0.121297	Cluster 1	Clustered	22.3915	H__sapiens__1_-717271	query	GNG2	2.16364	NM_053064	NP_444292	0.885771	FALSE	H__sapiens__1_-717271	2144		P59768
1934	regulation of I-kappaB kinase/NF-kappaB signaling|early endosome	GO:0043122|GO:0005769	140.356	4.27128	-105	0.00161031	48	0.333333	0.0320276	ENSG00000116729	ENSP00000436196	79971	WLS	-0.152317	Cluster 6	Clustered	6.375	H__sapiens__1_-705593	query	WLS	2.11818	NM_024911	NP_079187	0.858716	FALSE	H__sapiens__1_-705593	2192	mig-14	Q5T9L3
1937	sensory perception|G-protein coupled receptor activity	GO:0007600|GO:0004930	4.33065	3.42514	-184	0.00138696	10	0.333333	0.00715909	ENSG00000173662	ENSP00000414166	80835	TAS1R1	-0.0585256	Cluster 6	Clustered	7	H__sapiens__1_-714566	query	TAS1R1	1.81515	NM_177540	NP_803884	0.943154	FALSE	H__sapiens__1_-714566	58	T1R1	Q7RTX1
1944	cellular metal ion homeostasis|sensory perception|behavior|positive regulation of cytosolic calcium ion concentration|kinase regulator activity|cellular calcium ion homeostasis|cytosolic calcium ion homeostasis|G-protein coupled peptide receptor activity|phospholipase activity|cellular divalent inorganic cation homeostasis|calcium ion homeostasis|divalent inorganic cation homeostasis|G-protein co…	GO:0006875|GO:0007600|GO:0007610|GO:0007204|GO:0019207|GO:0006874|GO:0051480|GO:0008528|GO:0004620|GO:0072503|GO:0055074|GO:0072507|GO:0004930|GO:0001653|GO:0055065|GO:0004629|GO:0030003|GO:0006873|GO:0019216|GO:0016298|GO:0007200|GO:0001664	96.2278	4.76819	-115	0.00157978	36	0.333333	0.0229028	ENSG00000110148	ENSP00000437001	887	CCKBR	-0.146639		Unclustered	3.11957	H__sapiens__1_-704730	query	CCKBR	2.08182	NM_176875	NP_795344	0.863606	FALSE	H__sapiens__1_-704730	1594		P32239
1964			38.8072	4.26926	-151	0.0014771	19	0.333333	0.00945747	ENSG00000182903	ENSP00000430163	170960	ZNF721	-0.132815		Unclustered	2.18182	H__sapiens__1_-716365	query	ZNF721	1.94848	NM_133474	NP_597731	0.875627	FALSE	H__sapiens__1_-716365	492	KIAA1982	Q8TF20
2175	epithelial cell differentiation|inflammatory response	GO:0030855|GO:0006954	25.4911	3.1818	-145	0.00148368	22	0.333333	0.0107609	ENSG00000169194	ENSP00000479835	3596	IL13	-0.216203	Cluster 8	Clustered	3.76923	H__sapiens__1_-713538	query	IL13	1.95758	NM_002188	NP_002179	0.805571	FALSE	H__sapiens__1_-713538	324	P600	P35225
2574	axon|neuron part|neurotransmitter metabolic process|regulation of neurotransmitter levels|active transmembrane transporter activity|neuronal cell body|cell body|neurotransmitter biosynthetic process|neuron projection|monoamine transport	GO:0030424|GO:0097458|GO:0042133|GO:0001505|GO:0022804|GO:0043025|GO:0044297|GO:0042136|GO:0043005|GO:0015844	103.986	5.2084	-117	0.00157978	34	0.333333	0.0205691	ENSG00000276996	ENSP00000479597	6531	SLC6A3	-0.228277	Cluster 7	Clustered	5.51515	H__sapiens__1_-709217	query	SLC6A3	2.08182	NM_001044	NP_001035	0.795904	FALSE	H__sapiens__1_-709217	1476	DAT	Q01959
2824	G-protein coupled receptor activity	GO:0004930	8.75122	4.5071	-178	0.00139665	10	0.333333	0.00555513	ENSG00000152207	ENSP00000482041	57105	CYSLTR2	-0.104502		Unclustered	2	H__sapiens__1_-710499	query	CYSLTR2	1.8303	NM_020377	NP_065110	0.900773	FALSE	H__sapiens__1_-710499	128	CYSLT2R	Q9NS75
2928			64.3834	4.82965	-146	0.00149477	22	0.333333	0.0102782	ENSG00000213020	ENSP00000472910	81856	ZNF611	-0.121068		Unclustered	1.75238	H__sapiens__1_-723308	query	ZNF611	1.97273	NM_030972	NP_112234	0.885974	FALSE	H__sapiens__1_-723308	762	MGC5384	Q8N823
2939	cellular metal ion homeostasis|cyclic nucleotide metabolic process|reactive oxygen species metabolic process|regulation of purine nucleotide biosynthetic process|regulation of lyase activity|regulation of cyclase activity|cAMP metabolic process|ribose phosphate biosynthetic process|response to monoamine|regulation of adenylate cyclase activity|negative regulation of oxidoreductase activity|respon…	GO:0006875|GO:0009187|GO:0072593|GO:1900371|GO:0051339|GO:0031279|GO:0046058|GO:0046390|GO:0071867|GO:0045761|GO:0051354|GO:0071869|GO:0007189|GO:0055074|GO:0072507|GO:0004930|GO:0051341|GO:0055065|GO:0030594|GO:0006873|GO:0007187|GO:0009152|GO:0007212|GO:0014070|GO:0006164|GO:0030799|GO:0006874|GO:0007188|GO:1901293|GO:0030817|GO:0009165|GO:0030808|GO:0072522|GO:0071868|GO:0072503|GO:0009190|GO:…	549.916	3.80288	-53	0.00175747	103	0.5	0.0661062	ENSG00000169676	ENSP00000306129	1816	DRD5	-0.209655	Cluster 1	Clustered	22.3915	H__sapiens__1_-713645	query	DRD5	2.27576	NM_000798	NP_000789	0.810864	FALSE	H__sapiens__1_-713645	7936	DRD1L2	P21918
2961			21.6856	4.43606	-146	0.00149925	17	0.333333	0.0122576	ENSG00000068489	ENSP00000481852	55771	PRR11	-0.151302	Cluster 6	Clustered	6	H__sapiens__1_-702020	query	PRR11	1.97879	NM_018304	NP_060774	0.859588	FALSE	H__sapiens__1_-702020	384	FLJ11029	Q96HE9
3907	behavior|blood circulation|G-protein coupled receptor activity|circulatory system process	GO:0007610|GO:0008015|GO:0004930|GO:0003013	3.06056	3.91737	-213	0.00134409	7	0.333333	0.00429526	ENSG00000204174	ENSP00000480883	5540	NPY4R	-0.0700171		Unclustered	1.04762	H__sapiens__1_-720808	query	PPYR1	1.74545	NM_005972	NP_005963	0.932378	FALSE	H__sapiens__1_-720808	58	Y4	P50391
4512			8.45385	2.85217	-161	0.00145349	14	0.333333	0.00778802	ENSG00000174576	ENSP00000433135	266743	NPAS4	-0.0563168		Unclustered	2.66667	H__sapiens__1_-714728	query	NPAS4	1.91515	NM_178864	NP_849195	0.94524	FALSE	H__sapiens__1_-714728	112	PASD10	Q8IUM7
4559	extrinsic component of plasma membrane|extrinsic component of cytoplasmic side of plasma membrane|extrinsic component of membrane|heterotrimeric G-protein complex|response to light stimulus|GTPase activity|response to radiation	GO:0019897|GO:0031234|GO:0019898|GO:0005834|GO:0009416|GO:0003924|GO:0009314	77.9369	1.80116	-106	0.00160772	59	0.333333	0.0316252	ENSG00000167083	ENSP00000426022	2793	GNGT2	-0.104032	Cluster 1	Clustered	22.3915	H__sapiens__1_-713012	query	GNGT2	2.11515	NM_031498	NP_113686	0.901197	FALSE	H__sapiens__1_-713012	1144	GNG9	O14610
4693	coated vesicle|synaptic vesicle localization|dendritic spine|neuron spine|regulation of neurotransmitter transport|establishment of vesicle localization|vesicle localization|synaptic vesicle transport|catecholamine secretion|neuron projection|axon cargo transport|neuron part|cytoskeleton-dependent intracellular transport|regulation of neurotransmitter levels|microtubule-based transport|regulation…	GO:0030135|GO:0097479|GO:0043197|GO:0044309|GO:0051588|GO:0051650|GO:0051648|GO:0048489|GO:0050432|GO:0043005|GO:0008088|GO:0097458|GO:0030705|GO:0001505|GO:0010970|GO:0050804|GO:0012506|GO:0014069|GO:0044456|GO:0051952|GO:0045202|GO:0030662|GO:0030424|GO:0051656|GO:0030136|GO:0007212|GO:0030665|GO:0097480|GO:0006836|GO:0030659|GO:0015850|GO:0008277|GO:0015844|GO:0023061|GO:0006892|GO:0043269|GO:…	113.388	4.50352	-102	0.00161812	44	0.333333	0.0347122	ENSG00000047579	ENSP00000481997	84062	DTNBP1	-0.116724		Unclustered	5.13846	H__sapiens__1_-701598	query	DTNBP1	2.12727	NM_183040	NP_898861	0.889831	FALSE	H__sapiens__1_-701598	1944	My031	Q96EV8
6344			41.23	5.09572	-130	0.00154799	23	0.333333	0.015849	ENSG00000143933	ENSP00000486952		CALM2	-0.074567	Cluster 6	Clustered	7	H__sapiens__1_-709486	query	CALM2	2.04242	NM_001743	NP_001734	0.928145	FALSE	H__sapiens__1_-709486	584	CAMII
6723			9.93949	4.26274	-164	0.00145349	13	0.333333	0.00958856	ENSG00000144401	ENSP00000416570	151194	METTL21A	-0.0697802		Unclustered	3.2381	H__sapiens__1_-709553	query	METTL21A	1.91515	NM_145280	NP_660323	0.932599	FALSE	H__sapiens__1_-709553	124	LOC151194	Q8WXB1
6725			15.7912	3.83591	-145	0.00151057	18	0.333333	0.0124511	ENSG00000182836	ENSP00000367032	345557	PLCXD3	-0.0527366	Cluster 8	Clustered	4.53333	H__sapiens__1_-716347	query	PLCXD3	1.99394	NM_001005473	NP_001005473	0.94863	FALSE	H__sapiens__1_-716347	238		Q63HM9
11158	cellular modified amino acid metabolic process|mitochondrial membrane|organelle inner membrane|mitochondrial inner membrane|alpha-amino acid metabolic process	GO:0006575|GO:0031966|GO:0019866|GO:0005743|GO:1901605	3.09581	2.16429	-187	0.00140056	10	0.333333	0.0082336	ENSG00000223572	ENSP00000487331	548596	CKMT1A	-0.0252355		Unclustered	4.10714	H__sapiens__1_-726021	query	CKMT1A	1.83636	NM_001321926	NP_001308855	0.97508	FALSE	H__sapiens__1_-726021	68
